# Supplementary material for: Perceptions of patient safety culture among medical students: a cross-sectional investigation in Heilongjiang Province, China
Source: PubMed Central journal article supplement — BMJ Open. 2018 Jul 12;8(7):e020200. doi: 10.1136/bmjopen-2017-020200 (PMC6082492; doi:10.1136/bmjopen-2017-020200), 2018-07-12
Supplement: bmjopen-2017-020200.draft_revisions.pdf [file bmjopen-2017-020200.draft_revisions.pdf]

# BMJ Open

BMJ Open is committed to open peer review. As part of this commitment we make the peer review history of every article we publish publicly available.

When an article is published we post the peer reviewers' comments and the authors' responses online. We also post the versions of the paper that were used during peer review. These are the versions that the peer review comments apply to.

The versions of the paper that follow are the versions that were submitted during the peer review process. They are not the versions of record or the final published versions. They should not be cited or distributed as the published version of this manuscript.

BMJ Open is an open access journal and the full, final, typeset and author-corrected version of record of the manuscript is available on our site with no access controls, subscription charges or pay-per-view fees (<http://bmjopen.bmj.com>).

If you have any questions on BMJ Open's open peer review process please email [info.bmjopen@bmj.com](mailto:info.bmjopen@bmj.com)

# BMJ Open

## Perceptions of patient safety cultures among medical students: A cross-sectional investigation in Heilongjiang Province, China

|                                 |                                                                                                                                                                                                                                                                                                                                                                                                                                                                                                                                                                                                                                                                                                                                                                                                                                                                                                                                                                                                                                                                                                                                                                                                                                                                                                                                                                                                                                                                                                                                                                                                                                                                                        |
|---------------------------------|----------------------------------------------------------------------------------------------------------------------------------------------------------------------------------------------------------------------------------------------------------------------------------------------------------------------------------------------------------------------------------------------------------------------------------------------------------------------------------------------------------------------------------------------------------------------------------------------------------------------------------------------------------------------------------------------------------------------------------------------------------------------------------------------------------------------------------------------------------------------------------------------------------------------------------------------------------------------------------------------------------------------------------------------------------------------------------------------------------------------------------------------------------------------------------------------------------------------------------------------------------------------------------------------------------------------------------------------------------------------------------------------------------------------------------------------------------------------------------------------------------------------------------------------------------------------------------------------------------------------------------------------------------------------------------------|
| Journal:                        | <i>BMJ Open</i>                                                                                                                                                                                                                                                                                                                                                                                                                                                                                                                                                                                                                                                                                                                                                                                                                                                                                                                                                                                                                                                                                                                                                                                                                                                                                                                                                                                                                                                                                                                                                                                                                                                                        |
| Manuscript ID                   | bmjopen-2017-020200                                                                                                                                                                                                                                                                                                                                                                                                                                                                                                                                                                                                                                                                                                                                                                                                                                                                                                                                                                                                                                                                                                                                                                                                                                                                                                                                                                                                                                                                                                                                                                                                                                                                    |
| Article Type:                   | Research                                                                                                                                                                                                                                                                                                                                                                                                                                                                                                                                                                                                                                                                                                                                                                                                                                                                                                                                                                                                                                                                                                                                                                                                                                                                                                                                                                                                                                                                                                                                                                                                                                                                               |
| Date Submitted by the Author:   | 20-Oct-2017                                                                                                                                                                                                                                                                                                                                                                                                                                                                                                                                                                                                                                                                                                                                                                                                                                                                                                                                                                                                                                                                                                                                                                                                                                                                                                                                                                                                                                                                                                                                                                                                                                                                            |
| Complete List of Authors:       | <p>Liu, He; Hebei Medical University, Office of Academic Affairs</p> <p>Li, Ying; Harbin Medical University, Department of Health Policy and Hospital Management</p> <p>Zhao, Siqi; Hebei Medical University, Department of Nursing Psychology and Humanities</p> <p>Jiao, Mingli; Harbin Medical University, Health policy ; Chinese Academy of Social Science, Institute of Quantitative &amp; Technical Economics</p> <p>Lu, Yan; Jiamusi University, School of Public Health</p> <p>Liu, Jinghua; QiQihar Medical University</p> <p>Jiang, Kexin; Harbin Medical University, Department of Health Policy and Hospital Management, School of Public Health</p> <p>Fang, Huiying; Harbin Medical University, Department of Health, Policy and Hospital Management, School of Public Health</p> <p>Sun, Peihang; Harbin Medical University, Department of Health, Policy and Hospital Management, School of Public Health</p> <p>Li, Peng; Harbin Medical University, Department of Health Policy and Hospital Management, School of Public Health</p> <p>Wang, Yameng; Harbin Medical University, Department of Health Policy and Hospital Management</p> <p>Jia, Haonan; Harbin Medical University, Department of Health Policy and Hospital Management, School of Public Health</p> <p>Wu, Yuming; Hebei Medical University, Department of physiology, School of basic medicine</p> <p>Liu, Limin; The 2nd Affiliated Hospital of Harbin Medical University, Medical record room</p> <p>Zhao, Yanming; The 2nd Affiliated Hospital of Harbin Medical University, CT room</p> <p>Wu, Qunhong; Harbin Medical University, Department of Social Medicine, School of Public Health</p> |
| <b>Primary Subject Heading</b>: | Public health                                                                                                                                                                                                                                                                                                                                                                                                                                                                                                                                                                                                                                                                                                                                                                                                                                                                                                                                                                                                                                                                                                                                                                                                                                                                                                                                                                                                                                                                                                                                                                                                                                                                          |
| Secondary Subject Heading:      | Health policy, Medical education and training                                                                                                                                                                                                                                                                                                                                                                                                                                                                                                                                                                                                                                                                                                                                                                                                                                                                                                                                                                                                                                                                                                                                                                                                                                                                                                                                                                                                                                                                                                                                                                                                                                          |
| Keywords:                       | hidden curriculum, medical student, patient safety culture                                                                                                                                                                                                                                                                                                                                                                                                                                                                                                                                                                                                                                                                                                                                                                                                                                                                                                                                                                                                                                                                                                                                                                                                                                                                                                                                                                                                                                                                                                                                                                                                                             |
|                                 |                                                                                                                                                                                                                                                                                                                                                                                                                                                                                                                                                                                                                                                                                                                                                                                                                                                                                                                                                                                                                                                                                                                                                                                                                                                                                                                                                                                                                                                                                                                                                                                                                                                                                        |

1  
2  
3  
4  
5  
6  
7  
8  
9  
10  
11  
12  
13  
14  
15  
16  
17  
18  
19  
20  
21  
22  
23  
24  
25  
26  
27  
28  
29  
30  
31  
32  
33  
34  
35  
36  
37  
38  
39  
40  
41  
42  
43  
44  
45  
46  
47  
48  
49  
50  
51  
52  
53  
54  
55  
56  
57  
58  
59  
60

SCHOLARONE™  
Manuscripts

For peer review only

## Perceptions of patient safety cultures among medical students: A cross-sectional investigation in Heilongjiang Province, China

He Liu<sup>1†</sup>, Ying Li<sup>2†</sup>, Siqi Zhao<sup>3</sup>, Mingli Jiao<sup>2,4\*</sup>, Yan Lu<sup>5</sup>, Jinghua Liu<sup>6</sup>, Kexin Jiang<sup>2</sup>, Huiying Fang<sup>2</sup>, Peihang Sun<sup>2</sup>, Peng Li<sup>2</sup>, Yameng Wang<sup>2</sup>, Haonan Jia<sup>2</sup>, Yuming Wu<sup>7\*</sup>, Limin Liu<sup>8</sup>, Yanming Zhao<sup>9</sup>, Qunhong Wu<sup>10\*</sup>

- 1 Office of Academic Affairs, Hebei Medical University, 361 Zhongshan East Road, Chang'an District, Shijiazhuang 050017, China; E-Mail: 771773207@qq.com (H.L.)
- 2 Department of Health Policy and Hospital Management, School of Public Health, Harbin Medical University, 157 Baojian Road, Nangang District, Harbin 150081, China; E-Mails: 1690342267@qq.com(Y.L.); 576732775@qq.com(S.Z.); jiangkexin1994@163.com(K.J.); 565453428@qq.com(H.F.); 745450570@qq.com (P.S.); 18845146293@163.com(P.L.); 984453904@qq.com(Y.W.); [495150755@163.com](mailto:495150755@163.com)(H.J.)
- 3 Department of Nursing Psychology and Humanities, Hebei Medical University, Donggang Road 48, Yuhua District, Shijiazhuang 050017, China; E-Mail: siqizhao1992@foxmail.com(S.Z.)
- 4 Institute of Quantitative & Technical Economics, Chinese Academy of Social Science, 5 Jian guo men nei Road, Dongcheng District, Beijing 100000, China; E-Mail: minglijiao@126.com(M.J.)
- 5 School of Public Health, Jiamusi University, Jiamusi 154007, China; E-Mail: yanlulyan@163.com(Y.L.)
- 6 School of Public Health, QiQihar Medical University, QiQihar 161006, China; E-Mail: liujinghuajhl@126.com(J.L.)
- 7 Department of physiology, School of basic medicine, Hebei Medical University, 361 Zhongshan Road, Changan District, Shijiazhuang 050017, China; E-Mail: wuyanmingymw@126.com (Y.W.)
- 8 Medical record room, The 2nd Affiliated Hospital of Harbin Medical University, Harbin 150081, China; E-Mail: liuliminlml@126.com (L.L.)
- 9 CT room, The 2nd Affiliated Hospital of Harbin Medical University, Harbin 150081, China; E-Mail: yanmingzhaozym@163.com (Y.Z.)
- 10 Department of Social Medicine, School of Public Health, Harbin Medical University, 157 Baojian Road, Nangang District, Harbin 150081, China; E-Mails: wuqunhong12345@163.com(Q.W.)

†These authors contributed equally to this work.

\*Correspondence : [minglijiao@126.com](mailto:minglijiao@126.com); [wuqunhong12345@163.com](mailto:wuqunhong12345@163.com); [wuyanmingymw@126.com](mailto:wuyanmingymw@126.com)

## Abstract

**Objectives:** Medical school education plays an important role in promoting patient safety. The present study investigated medical students' perspectives regarding a general patient safety culture, identifying students' educational needs across different institutions and cohorts. The ultimate goal of this assessment was to reveal evidence regarding how to promote patient safety in medical school curricula.

**Method:** A cross-sectional study was conducted within each of the four medical universities in Heilongjiang province. First through fifth-year medical students completed an anonymous questionnaire—the Attitudes toward Patient Safety Questionnaire III (APSQ-III). Differences in responses across the four universities and cohorts were analyzed.

**Results:** Overall perceptions of patient safety cultures across the four medical universities were positive. The highest positive response rate was for, "I have a good understanding of patient safety issues as a result of my undergraduate medical training" (range: 58.4%–99.8%), while the lowest positive response rate was for, "medical errors are a sign of incompetence" (14.7%–47.9%).

Younger cohorts had a better awareness of working hours and teamwork. However, fourth and fifth-year students had a better awareness of error inevitability. The lowest positive scores between cohorts included items related to "professional incompetence as an error cause" and "disclosure responsibility."

**Conclusions:** Perceptions of a patient safety culture among students from various medical schools were positive, suggesting a willingness to learn about this important issue. Policy makers should place a greater focus on varied educational needs across schools and cohorts in order to establish proper curricula.

**Keywords:** hidden curriculum, medical student, patient safety culture

## Strengths and limitations of this study

1. Medical student opinions/evaluations regarding patient safety cultures are rather positive.
2. Positive perceptions of the patient safety culture tended to decrease from younger to older cohorts.
3. The APSQ-III is a new instrument that has yet to be subjected to re-testing for reliability and predictive validity.

## 1. Introduction

Hippocrates, who is considered the "father of medicine," proposed the "Hippocratic Oath." This proclamation is made by tens of thousands of medical students worldwide in order to promote a rigorous and enthusiastic attitude toward medical education. Here, the maintenance and promotion of human safety is of utmost importance.

However, as noted a decade ago by the Institute of Medicine (IOM), accountability for patient safety requires a multilayered approach—one that addresses system errors as well as human ones—to help prevent medical errors [1-3]. Advancements in patient safety require a fundamental culture change in healthcare. Reducing harm through an improved safety culture is a global priority [2]. Policy makers, payers, and groups (such as the Agency for Healthcare, Research, and Quality (AHRQ), National Patient Safety Agency, and World Health Organization) have resulted in numerous safety initiatives at the national and institutional level [4]. However, most measures have targeted doctors, managers, and other health care professionals. Less attention has been paid to medical students, the next generation of medical scientists [5].

The clinical practice stage is key for acquiring practical skills among medical students, at which point the student begins to shift roles from "student" to "doctor." To protect the legitimate rights of teachers and medical students and the interests of patients, and to ensure the quality of medical education, the National Health and Family Planning Commission and the Ministry of Education of the People's Republic of China develop a clear regulatory requirements for medical students and medical graduates in clinical trial practice. They point out that the clinical teacher bear the corresponding legal responsibility, if the medical disputes due to the clinical teacher incorrectly guidance. In case the medical students conducting clinical treatment activities without the permission from clinical teacher, individuals will bear the corresponding legal responsibility.

There is now a growing awareness that students are influenced not only by what is taught in a formal curriculum but also by unspoken, powerful messages conveyed through interactions with superiors and educators during students' clinical practice [6-8]. For example, although students are taught before interacting with patients to wash their hands, it is not until they witness doctors engaging in this behavior within a clinical setting that this requirement is truly understood.

One of the medical teachers from Harbin Medical University said that the main purpose of clinical practice is to form proper of "clinical thinking." This lays a solid foundation for the student's

1  
2  
3 future work. My teachers not only provided us with knowledge but exemplars of a proper work  
4 ethic and style. Thus, I am attempting to pass on these characteristics onto students.  
5

6  
7 Thus, medical school curricula need to be strengthened to help comprehensively advocate safety  
8 training. Work within this “hidden curriculum” can deal with students who may deliver or be  
9 taught messages that oppose content from the formal curriculum, professional values, and even  
10 practices for safe patient care. During pressure situations, such as those experienced during  
11 emergencies, doctors can be challenged with making proper decisions in a timely fashion, which  
12 could be an enormous threat to patient safety [9].  
13

14  
15 Therefore, the nation’s medical schools, teaching hospitals, and health systems recognize that  
16 achieving greater patient safety requires more than a brief course in an already crowded medical  
17 school curriculum. There is a need for a fundamental culture change across all phases of medical  
18 education. [10].  
19

20  
21 Some scholars have addressed issues related to improved patient safety. For instance, we  
22 previously observed that open communication, non-punitive responses to errors, and  
23 professionalism are key areas of concern regarding medical students’ perceptions of the patient  
24 safety culture [11]. Leung investigated perspectives of the patient safety culture among medical  
25 students in Hong Kong and Singapore and compared students’ educational needs. However only a  
26 single cohort was surveyed; they did not consider differences in educational need across cohorts  
27 [12].  
28

29  
30 Patient safety education in areas with low medical standards and high medical risks, as is the case  
31 within developing countries like China, are just getting started [13]. There are a few reports  
32 exploring safety education content and teaching methods in China [14]. However, patient safety  
33 education has not been fully implemented within curricula and clinical practice. Lack of  
34 knowledge regarding patient safety remains a common reason for medical errors [15]. The first  
35 important question, then, is to determine what knowledge medical students are specifically lacking.  
36 Additionally, information is needed regarding cognitive components of students’ perceptions of  
37 the patient safety culture. Finally, we need to assess students’ explicit educational needs and what  
38 should be focused upon within a patient safety curriculum. Understanding these various  
39 components are the first steps in providing patient safety education.  
40

41  
42 Low levels of hospital management, limited personal technology, and other issues are prevalent in  
43  
44  
45  
46  
47  
48  
49  
50  
51  
52  
53  
54  
55  
56  
57  
58  
59  
60

1  
2  
3 developing countries. Thus, patient safety problems tend to be more serious than what is observed  
4 in developed countries [16]. Addressing safety education for medical students in developing  
5 countries is particularly urgent. The WHO Director General, Margaret Chan, highlighted patient  
6 safety as a key task going forward [17]. This led to the publication of a Chinese version of the  
7 “WHO Patient Safety Course Guide” in July 2012 in support of a resolution from the Ministry of  
8 Health (National Health and Family Planning Commission of the People’s Republic of China).  
9  
10 Heilongjiang province, as the healthcare center of Northeast China, has the largest area and  
11 availability of health resources. Harbin Medical University has the best educational reputation  
12 level with the most stringent entrance requirements. Qiqihar Medical University, Mudanjiang  
13 Medical University, and the Medical College of Jiamusi University are also prominent (along with  
14 their three-level hospitals) in Heilongjiang province. The China Health Statistics Yearbook (2014)  
15 revealed that there are 21,158 medical and health institutions in the Heilongjiang region, with  
16 medical services covering about 3,813 thousand people from the local population [15]. This is  
17 equivalent to three times the population of Beijing and half of the UK population. Understanding  
18 the baseline patient safety culture, and identifying important and urgent educational needs, is  
19 critical for the effective design and successful implementation of education programs at  
20 Heilongjiang’s medical institutions [15]. Thus, the present paper evaluated the patient safety  
21 culture from students’ perceptions. This was done to explore factors critical to transforming  
22 patient safety perspectives and address students’ educational needs.  
23  
24  
25  
26  
27  
28  
29  
30  
31  
32  
33  
34  
35  
36  
37  
38  
39  
40  
41  
42  
43  
44  
45  
46  
47  
48  
49  
50  
51  
52  
53  
54  
55  
56  
57  
58  
59  
60



## 2. Methods

### 2.1 Sampling and Data collection

We conducted a cross-sectional survey within the four, aforementioned medical universities in Heilongjiang province. This was done to determine undergraduate students' perceptions of their patient safety culture and educational needs. All medical universities in the province were assessed. None of the students had received any prior formal teaching on patient safety, enabling the assessment of any baseline safety culture among these students. Cooperation was obtained from managers in the student offices. We randomly selected 726 (response rate: 90.8%) students from Harbin Medical University, 631 (78.9) students from QiQihar Medical University, 459 (57.4) students from Mudanjiang Medical University, and 682 (85.3) students from the Medical College of Jiamusi University. First through fifth-year students were sampled. With this procedure, we obtained 2,498 valid questionnaires (total response rate: 78.1%).

### 2.2 Questionnaire

The survey instrument used was the Attitudes toward Patient Safety Questionnaire III (APSQ-III)[12,18-21], specifically designed for students and covered nine key factors of patient safety culture. The APSQ-III assesses students on various factors regarding a patient safety culture, rather than examining differences in their actual education. Therefore, this measure can more accurately reflect realistic educational needs [12].

The questionnaire consists of 26 items covering nine key patient safety factors:

- (a) patient safety training received (items 1–3);
- (b) error reporting confidence (items 4–6);
- (c) working hours as an error cause (items 7–9);
- (d) error inevitability (items 10–12);
- (e) professional incompetence as an error cause (items 13–16);
- (f) disclosure responsibility (items 17–19);
- (g) team functioning (items 20 and 21);
- (h) patient involvement in reducing error (items 22 and 23);
- and (i) importance of patient safety in the curriculum (items 24–26).

### 2.3 Data analyses

Responses were recorded on a five-point Likert scale, with 5 = strongly agree and 1 = strongly

1  
2  
3 disagree. Responses were grouped into agree (i.e., 4 or 5) and disagree (i.e., 1 or 2), and overall  
4 percentages were obtained [12]. We compared percent positive responses between schools and  
5 cohort subgroups using a chi-square test. We excluded unanswered questions from the analyses.  
6  
7 Level of significance was set at  $p < .05$ .  
8  
9

#### 10 11 **2.4 Ethics approval**

12 The study protocol was reviewed and approved by the Research Ethics Committee of Harbin  
13 Medical University. Before the survey, approval was also obtained from each school. All  
14 participants voluntarily and anonymously participated and provided their written informed  
15 consent.  
16  
17  
18  
19  
20  
21  
22  
23  
24  
25  
26  
27  
28  
29  
30  
31  
32  
33  
34  
35  
36  
37  
38  
39  
40  
41  
42  
43  
44  
45  
46  
47  
48  
49  
50  
51  
52  
53  
54  
55  
56  
57  
58  
59  
60

### 3. Results

Of the Year 1-5 students who responded to the demographic questions, 1,055 (42.4%) were male, and 1,435 (57.4%) were female. Response rates varied between cohorts (from first to fifth-years): 399 (16%); 483 (19.3%); 587 (23.5%); 746 (29.9%); 283 (11.3%).

Table 2 summarizes safety culture perceptions, by survey domain, for the combined group and the four subgroups. The overall highest scores were for, “patient safety training received,” “patient involvement in reducing errors,” “I have a good understanding of patient safety issues as a result of my undergraduate medical training,” and “patients have an important role in preventing medical errors.” The lowest average domain scores were for, “professional incompetence as an error cause,” “disclosure responsibility,” “medical errors are a sign of incompetence,” and “it is not necessary to report errors, which do not result in adverse outcomes for the patient.”

Specific to each medical institution, the highest level of positive safety perceptions was from Mudanjiang Medical College, with the highest score for the “patient safety training received” domain. Jiamusi Medical College was second with their highest domain score for “working hours as an error cause.” Qiqihar Medical University reported their highest score for “patient involvement in reducing errors.” The lowest score among these three institutions was for “professional incompetence as an error cause.” The lowest positive patient safety perceptions came from Harbin Medical University, with their highest domain score for “patient safety training received,” and their lowest score for “error reporting confidence.” There was a statistically significant difference between schools on responses to all nine key patient safety factors.

Table 3 summarizes safety culture perceptions based on survey domain for the combined group and for the five subgroups. The table displays results sorted by safety domain score. Perceptions of patient safety culture varied based on cohort. All five cohorts had a positive perception of “patient safety training received” and “patient involvement in reducing errors.” Moreover, first and second-year students’ perceptions of “working hours as an error cause” were high. Third-year students had a better awareness of “team functioning.” In addition to the aforementioned domains, fourth and fifth-year students also had a deep understanding of “error inevitability.” The lowest scores were in the “professional incompetence as an error cause” and “importance of patient safety in the curriculum” domains for all cohorts. There was a statistically significant difference between cohorts on responses to all items.

#### 4. Discussions

Since patient safety is a top health care priority, all medical undergraduates should have the necessary capacity to ensure minimal patient harm as they embark on their future career. Education and training are key to achieving this goal. New patient safety curricula across various medical colleges will need to adjust their teaching methods according to students' focal needs. As medical students are an integral part of our future health care systems, their experiences during school (and their perceptions of the patient safety culture) have an important influence on their attitudes toward patient safety and their behaviors within this domain [22]. Screening perceptions in key areas regarding patient safety is an opportunity to improve clinical acumen and future medical education. The present findings provide explicit medical student perspectives relevant to critical clinical services. Such information can be utilized by medical directors and clinical service supervisors for real-time assessment while promoting a safety culture. The APSQ-III has a stable factor structure and criterion validity; it can also distinguish between different student subgroups [12]. We conducted the present study to demonstrate how the APSQ-III can identify differences between different cohorts across several medical universities in Northeastern China.

Overall, our study highlights that medical student opinions/evaluations regarding patient safety cultures are rather positive [23]. It was interesting to observe that although none of our participants had received any formal teaching on the subject, students from all four universities were more likely to report good training on the subject (84.9%). This is the same with a previous study from Gilberto Ka Kit Leung in HongKong[12].The good training evaluation on the subject in our study may be due to a common psychological phenomenon of escape responsibility of student in China and a misunderstanding of what should be taught and the difference with mass media teaching.Many of them do not want to face the errors or defects, suggesting that we are likely to exist professionalism within the organization.Students who experience professional behavior may be unwilling to report things they believe are wrong in order to avoid poor evaluations and to fit in with their teams[4].We may should be more vigilant to prevent the students to misunderstood of the patient safety education course for fear of exposing deficiencies.

A few study limitations should be noted. First, despite good criterion validity, the APSQ-III is a new instrument that has yet to be subjected to re-testing for reliability and predictive validity.

1  
2  
3  
4  
5  
6  
7  
8  
9  
10  
11  
12  
13  
14  
15  
16  
17  
18  
19  
20  
21  
22  
23  
24  
25  
26  
27  
28  
29  
30  
31  
32  
33  
34  
35  
36  
37  
38  
39  
40  
41  
42  
43  
44  
45  
46  
47  
48  
49  
50  
51  
52  
53  
54  
55  
56  
57  
58  
59  
60

Nevertheless, the APSQ-III was first used to compare patient safety cultures in different schools and cohorts within Mainland China. While the present sample was taken from only one region in China, we covered all of the medical colleges within a rather large province. Thus, the present study represents an important first step toward patient safety education in China. We believe that educators can help create a sense of hidden patient safety curricula by building on our findings.

Schools could use percent positive scores to determine where to prioritize improvement efforts[4]. Compared with results from Leung, their three highest scores were for “working hours as an error cause,” “error inevitability,” and “importance of patient safety in the curriculum.” “Patient involvement in reducing error” and “team functioning” received the lowest overall scores in that previous study [12]. In the present study, “patient involvement in reducing errors” and “patient safety training received” were the most positively endorsed domains, while “professional incompetence as an error cause” and “disclosure responsibility” were strong barriers to positive student patient safety perceptions.

Our study found that responses to the “professional incompetence as an error cause” domain were negative, especially for the following items: “medical errors are a sign of incompetence” (32.5%), “medical students generally consider errors as inevitable” (74.9), and “even the most experienced and competent doctors make errors” (84.3%); however, the students lack a proper understanding regarding the reasons for errors. Our results are similar to a study in the US by Moskowitz et al., which revealed that students are uncertain as to what defines an error and what leads to a medical error [19].

Medical students generally agreed that medical errors are human-caused and that medical errors are a sign of incompetence (32.5%). This shows that the present sample of medical students lack awareness regarding systematic errors. Long working hours and medical staff incompetence were noted by several students as important reasons for errors. This may indicate that the students are placing an emphasis on human factors resulting in errors. This is in line with findings from a previous study involving Hong Kong students in which a majority of students reported that “if they work hard, they can eliminate errors” as an effective strategy for preventing future errors [25]. These findings could suggest a need for emphasizing the potential roles of other factors (e.g. system errors and procedural complexity) during the occurrence of medical errors.

Several students reported positive evaluations of their error reporting confidence but a punitive

1  
2  
3  
4  
5  
6  
7  
8  
9  
10  
11  
12  
13  
14  
15  
16  
17  
18  
19  
20  
21  
22  
23  
24  
25  
26  
27  
28  
29  
30  
31  
32  
33  
34  
35  
36  
37  
38  
39  
40  
41  
42  
43  
44  
45  
46  
47  
48  
49  
50  
51  
52  
53  
54  
55  
56  
57  
58  
59  
60

evaluation surrounding their responsibility in reporting (i.e., what and how to report when witnessing a problem with patient care). Medical students' high confidence in reporting medical errors (74.9%) is similar with results from a Turkish study conducted by Karaoglu et al. They found that 60.7% (n = 147) of students stated that they would report an error to the hospital committee if they, themselves, made a medical error. Furthermore, 68.6% (n = 166) of the students stated that they would report a medical error they witnessed [26-27].

In Flin et al.'s study, the majority of students stated they would speak up about an error. However, this result was a bit confusing, since students also endorsed the item, "it is not necessary to report errors that do not result in adverse outcomes for the patient" (60.8%). More than 50% of students from the Medical College at Jiamusi University agreed with this statement, as well. All members of the medical team, including medical students, should be able to recognize unsafe conditions, report errors, and improve error disclosure if not sufficiently conducted. This persistent cultural change should contribute to the eradication of errors and reduce patient safety concerns [28-31].

Several students agreed with the following statements: "my training is preparing me to understand the causes of medical errors" (84.8%) and "I have a good understanding of patient safety issues as a result of my undergraduate medical training" (85.2%). This illustrates that medical students have high expectations regarding patient safety education, which is in line with a study from Madigosky et al. This US-based study revealed that an awareness of patient safety and medical errors can be increased and sustained through the use of an experiential curriculum, which students rated as a valuable experience [32-33].

Insights can also be gained from the similarities observed between the four medical schools. The descending order of positive perceptions regarding patient safety cultures from the four universities are as follows: Mudanjiang Medical University, the Medical College of Jiamusi University, Qiqihar Medical University, and Harbin Medical University. There was no evidence of different reporting practices between the four medical schools. Yet, differences in local patient safety cultures, as well as differences in students' social and cultural backgrounds, may be significant contributing factors[29]. However, the present study design did not enable an exploration of these factors. We could only determine aspects of a future teaching focus. Mudanjiang Medical University, the Medical College of Jiamusi University, and Qiqihar Medical University would likely target education toward the classification, and underlying mechanisms, of

1  
2  
3 medical errors. Harbin Medical University might target confidence in error reporting as an area for  
4 improvement.  
5

6  
7 Our results also revealed that positive perceptions of the patient safety culture tended to decrease  
8 from younger to older cohorts. The first-year students held the highest perceptions, while the  
9 third-year students are the focus of concern. Results revealed a shift in this cohort, which may be  
10 due to third-year students entering into clinical practice. Thus, this stage could be a proper target  
11 for intervention in terms of improving future practice and behaviors among clinicians [32-33].  
12

13  
14 Our results are counter to those from other countries. For example, Flin et al.'s study in the UK  
15 found that the majority first year students reported "medium low" or "average" levels of  
16 knowledge regarding errors and patient safety issues [34-38].  
17

18  
19 In conclusion, our study builds on prior research assessing student experiences with the impact of  
20 "hidden curricula" on patient safety in China. Our results further suggest that medical students'  
21 perceptions regarding patient safety cultures can provide a tool for guiding medical education.  
22 Institutions should have an increased emphasis on issues related to the reasons behind medical  
23 errors and error reporting. Shifts in patient safety cultures should be based on situations affecting  
24 different schools and cohorts, especially among third-year medical students. Longitudinal studies  
25 using a validated instrument should also be conducted to better evaluate patient safety education  
26 programs and their relative impact on local healthcare development. Further studies should  
27 explore the culture of reporting errors and how students in nursing and healthcare profession  
28 programs address these errors.  
29  
30  
31  
32  
33  
34  
35  
36  
37  
38  
39  
40  
41  
42  
43  
44  
45  
46  
47  
48  
49  
50  
51  
52  
53  
54  
55  
56  
57  
58  
59  
60

## References

1. Kohn LT, Corrigan JM, Donaldson MS, eds. To err is human. Building a safer health system. Washington DC: National Academies Press, 2000.
2. Willeumier D. Advocate health care: a systemwide approach to quality and safety. *Jt Comm J Qual Saf* 2004; 30:559-66.
3. Kohn LT, Corrigan JM, Donaldson MS (eds). To Err is Human: Building a Safer Health System. Washington, DC, National Academy Press, 1999.
4. Joshua M. Liao, Jason M. Etchegaray, S. Tyler Williams, David H. Berger, MHCM, Sigall K. Bell, Eric J. Thomas. Assessing Medical Students' Perceptions of Patient Safety: The Medical Student Safety Attitudes and Professionalism Survey. *Acad Med*. 2014;89:343-351.
5. Darrell G Kirch, Philip G. Boysen. Changing The Culture In Medical Education To Teach Patient Safety. *Health affairs*. 29, NO. 9 (2010): 1600-1604.
6. Chuang AW, Nuthalapaty FS, Casey PM, et al. To the point: Reviews in medical education—taking control of the hidden curriculum. *Am J Obstet Gynecol*. 2010;203:316.e1-e6.
7. Crossing the Quality Chasm: A New Health System for the 21st Century. Washington, DC: National Academy Press, 2001.
8. Health Professions Education: A Bridge to Quality. Washington, DC: National Academies Press, 2003.
9. Flanagan B. *ngEducation*, 2004, 38(1): 56-66.
10. Sandars J, Bax N, Mayer D, Wass V, Vickers R. Educating undergraduate medical students about patient safety: priority areas for curriculum development. *Medical Teach* 2007; 29(1): 60-1.
11. Yanli Nie, Lin Li, Yurong Duan, Peixian Chen, Bruce H Barraclough, Mingming Zhang, Jing Li. Patient safety education for undergraduate medical students: a systematic review.
12. Gilberto Ka Kit Leung, Sophia Bee Leng Ang, Tang Ching Lau, Hong Jye Neo, Nivritti Gajanan Patil, Lian Kah Ti. Patient safety culture among medical students in Singapore and Hong Kong. *Singapore Med J* 2013; 54(9): 501-505.
13. Mingming Zhang, Yurong Duan, Jing Li. Patient safety education: One of the important topics for 21<sup>st</sup> medical education [J]. *Chin J Evid-based Med*. 2010. 10(6): 637-639.
14. Marilyn MW, Bruce HB, Samantha AVS, Susan LE. An Educational Approach to Improving Healthcare Safety and Quality. *Chin J Evid-based Med*. 2009, 9(9): 938-941.
15. China Statistical Yearbook of health and family planning. National Health and Family Planning Commission of the People's Republic of China. China Union Medical University Press. 2014.
16. Institute of Medicine. Committee on Quality of Health Care in America. To Err Is Human: Building a Safer Health System. Washington, DC: National Academy Press; 2000.
17. WHO Patient Safety Curriculum Guide for Medical Schools. 2009. Available from: <http://www.who.int/patientsafety/education/curriculum/download/en/index.html>.
18. Carruthers S, Lawton R, Sandars J, Howe A, Perry M. Attitudes to patient safety amongst medical students and tutors: Developing a reliable and valid measure. *Med Teach* 2009; 31:e370-6.
19. Sexton JB, Helmreich RL, Neilands TB, et al. The Safety Attitudes Questionnaire: Psychometric properties, benchmarking data, and emerging research. *BMC Health Serv Res*. 2006;6:44.
20. Wiggleton C, Petrusa E, Loomis K, et al. Medical students' experiences of moral distress: Development of a Web-based survey. *Acad Med*. 2010;85:111-117.
21. Etchegaray JM, Gallagher TH, Bell SK, Dunlap B, Thomas EJ. Error disclosure: A new domain for safety culture assessment. *BMJ Qual Saf*. 2012;21:594-599.
22. Agency for Healthcare Research and Quality. Hospital Survey on Patient Safety Culture. <http://www.ahrq.gov/qual/patientsafetyculture/hospindex.htm>. Accessed October 17, 2013.
23. Kline RB. Principles and Practice of Structural Equation Modeling. New York, NY: The Guilford Press; 2005.
24. Horsburgh M, Perkins R, Coyle B, Degeling P. The professional subcultures of students entering medicine, nursing and pharmacy programmes. *J Interprof Care*. 2006 Aug;20(4):425-31.



- 1  
2  
3 25. Leung GK, Patil NG. Patient safety in the undergraduate curriculum: medical students' perception. *Hong Kong Med J* 2010; 16:101-5.
- 4 26. Singer SJ, Gaba DM, Falwell A, et al. Patient safety climate in 92 US hospitals: differences by work area and discipline. *Med Care*
- 5 2009;47:23-31.
- 6 27. Karaoglu N, Seker M, Kara F, Okka B. Knowledge of new entrant medical students about medical errors in Selseuk University: an
- 7 educational perspective. *Tu rkiye Klinikleri Journal of Medical Sciences* 2008; 28(5):663-71.
- 8 28. Flin R, Patey R, Jackson J, Mearns K, Dissanayaka U. Year 1 medical undergraduates.knowledge of and attitudes to medical error.
- 9 *Medical Education* 2009; 43(12):1147-55.
- 10 29. Wetzel AP, Dow AW, Mazmanian PE. Patient safety attitudes and behaviors of graduating medical students. *Eval Health*
- 11 *Prof.*2012;35:221-238.
- 12 30. Caldicott CV, Faber-Langendoen K. Deception, discrimination, and fear of reprisal: Lessons in ethics from third-year medical students.
- 13 *Acad Med.* 2005;80:866-873.
- 14 31. Vohra PD, Johnson JK, Daugherty CK, Wen M, Barach P. Housestaff and medical student attitudes toward medical errors and adverse
- 15 events. *Jt Comm J Qual Patient Saf.*2007;33:493-501.
- 16 32. Chelsea Bowman, Naama Neeman, Niraj L. Sehgal. Enculturation of Unsafe Attitudes and Behaviors: Student Perceptions of Safety
- 17 *Culture.*academic medicine.2013;88:802-810.
- 18 33. Madigosky WS, Headrick LA, Nelson K, Cox KR, Anderson T. Changing and sustaining medical students' knowledge, skills, and
- 19 attitudes about patient safety and medical fallibility. *Academic Medicine* 2006; 81(1):94-101.
- 20 34. Patey R, Flin R, Cuthbertson BH, MacDonald L, Mearns K, Cleland J, et al. Patient safety: helping medical students understand error
- 21 in healthcare. *Quality and Safety in Health Care* 2007; 16(4): 256-9.
- 22 35. Pearson P, Steven A, Howe A, et al. Learning about patient safety: organizational context and culture in the education of health care
- 23 professionals. *J Health Serv Res Policy* 2010; 15 Suppl 1:4-10.
- 24 36. Walton MM. Hierarchies: The Berlin Wall of patient safety. *Qual Saf Health Care.* 2006;15:229-230.
- 25 37. Brainard AH, Brislen HC. Viewpoint: Learning professionalism: A view from the trenches. *Acad Med.* 2007;82:1010-1014.
- 26 38. Lucey C, Souba W. Perspective: The problem with the problem of professionalism. *Acad Med.* 2010;85:1018-1024.

### Acknowledgements:

This study was funded by the Natural Science Foundation of China (71273002, 71473064); the New Century Excellent Talents of University at the Ministry of Education, China (1252-NCET02); the China Postdoctoral Science Foundation (2015M570211, 2016T90181); and Collaborative Innovation Centre of Social Risks Governance in Health; Project of Education Department of Heilongjiang Province (Education Reform Project, JGXM\_HLJ\_2014087); Social science association of Heilongjiang Province (15058).

### Author contributions statement:

Mingli Jiao, Qunhong Wu, Ying Li and He Liu. designed the study; Jinghua Liu, Limin Liu, Yanming Zhao, Kexin Jiang, Huiying Fang, Peihang Sun, Peng Li, Yameng Wang, Haonan Jia and Yan Lu collected the data; He Liu, Ying Li, and Yuming Wu analysed the data; He Liu, Ying Li, Mingli Jiao, Siqi Zhao drafted the manuscript; and Mingli Jiao contributed to the manuscript's revision. All authors approved the final manuscript for publication.

**Conflict of interest declaration:** The authors declare no conflict of interest

**Data sharing statement:** Data are available from the corresponding author upon request.

Table 1. Participant demographic characteristics.

| subgroups      | No. (%) of respondents |                |               |             |               |             |               | Overall       |
|----------------|------------------------|----------------|---------------|-------------|---------------|-------------|---------------|---------------|
|                | Gender                 |                | Level         |             |               |             |               |               |
|                | M                      | F              | First Year    | Second Year | Third year    | Fourth year | Fifth Year    |               |
| A <sup>□</sup> | 322<br>(44.4)          | 404<br>(55.6)  | 111<br>(15.3) | 132 (18.2)  | 154<br>(21.2) | 245 (33.7)  | 84 (11.6)     | 726<br>(29.1) |
| B <sup>□</sup> | 261<br>(41.7)          | 366<br>(58.3)  | 186<br>(29.5) | 146 (23.1)  | 117<br>(18.5) | 100 (15.8)  | 82 (13)       | 631<br>(25.3) |
| C <sup>□</sup> | 167<br>(36.4)          | 292<br>(63.6)  | 36<br>(7.8)   | 115 (25.1)  | 110 (24)      | 131 (28.5)  | 67 (14.6)     | 459<br>(18.4) |
| D <sup>□</sup> | 305 (45)               | 377 (55)       | 66<br>(9.7)   | 90 (13.2)   | 206<br>(30.2) | 270 (39.6)  | 50 (7.3)      | 682<br>(27.3) |
| Total          | 1055<br>(42.4)         | 1435<br>(57.4) | 399<br>(16)   | 483 (19.3)  | 587<br>(23.5) | 746 (29.9)  | 283<br>(11.3) | 2498          |

<sup>□</sup>A = Harbin Medical University.

<sup>□</sup>B = Qiqihar Medical University.

<sup>□</sup>C = MuDanJiang Medical University.

<sup>□</sup>D = Medical College of Jiamusi University.

Table 2. Items from the APSQ-III that demonstrated significant differences between the four medical universities.

| Domain                                                                                                                                         | Positive responses (%) <sup>‡</sup> |                 |      |      |      |
|------------------------------------------------------------------------------------------------------------------------------------------------|-------------------------------------|-----------------|------|------|------|
|                                                                                                                                                | Overall                             | Between schools |      |      |      |
|                                                                                                                                                |                                     | A*              | B*   | C*   | D*   |
| <b>Patient safety training received</b>                                                                                                        | 84.9                                | 57.3            | 90   | 99.4 | 98.5 |
| 1. My training is preparing me to understand the causes of medical errors.                                                                     | 84.8                                | 56.6            | 89.7 | 99   | 99   |
| 2. I have a good understanding of patient safety issues as a result of my undergraduate medical training.                                      | 85.2                                | 58.4            | 90.2 | 99.8 | 97   |
| 3. My training is preparing me to prevent medical errors.                                                                                      | 84.7                                | 56.8            | 90.1 | 99.3 | 99.4 |
| <b>error reporting confidence</b>                                                                                                              | 74.9                                | 53.1            | 75.8 | 85.6 | 88.1 |
| 4. I would feel comfortable reporting any errors I had made, no matter how serious the outcome had been for the patient.                       | 71.6                                | 52.9            | 68.5 | 80.5 | 85.7 |
| 5. I would feel comfortable reporting any errors other people had made, no matter how serious the outcome had been for the patient.            | 76.7                                | 53.4            | 79.8 | 88.1 | 89.5 |
| 6. I am confident I can talk openly to my supervisor about an error I had made, even if it resulted in potential or actual harm to my patient. | 76.5                                | 53.1            | 79   | 88.1 | 89.2 |
| <b>working hours as an error cause</b>                                                                                                         | 83.4                                | 56.2            | 88.2 | 98   | 98.7 |
| 7. Shorter shifts for doctors will reduce medical errors.                                                                                      | 81.7                                | 53.9            | 85.9 | 97.1 | 97.3 |
| 8. By not taking regular breaks during shifts, doctors are at an increased risk of making errors.                                              | 84.7                                | 57.8            | 89.8 | 98.9 | 99.5 |
| 9. The number of hours doctors work increases the likelihood of making medical errors.                                                         | 83.8                                | 56.8            | 89   | 97.9 | 99.4 |
| <b>error inevitability</b>                                                                                                                     | 74.9                                | 55.2            | 80.9 | 87.1 | 82.2 |
| 10. Even the most experienced and competent doctors make errors.                                                                               | 84.3                                | 56.7            | 89.4 | 99.8 | 98.7 |
| 11. A true professional does not make mistakes or errors.                                                                                      | 68.9                                | 53              | 79.3 | 86.1 | 64.8 |
| 12. Human error is inevitable.                                                                                                                 | 71.6                                | 56              | 73.9 | 75.4 | 83.2 |
| <b>professional incompetence as an error cause</b>                                                                                             | 58.4                                | 53.25           | 59.6 | 61   | 60   |
| 13. Most medical errors result from careless nurses <sup>†</sup>                                                                               | 68.1                                | 56.8            | 79   | 79.3 | 62.1 |
| 14. If people paid more attention at work, medical errors would be avoided <sup>†</sup>                                                        | 67.2                                | 53.2            | 62.5 | 72.8 | 80.1 |
| 15. Most medical errors result from careless doctors <sup>†</sup>                                                                              | 65.8                                | 55.1            | 74.2 | 77.1 | 61.4 |
| 16. Medical errors are a sign of incompetence <sup>†</sup>                                                                                     | 32.5                                | 47.9            | 22.7 | 14.7 | 36.5 |
| <b>disclosure responsibility</b>                                                                                                               | 69.4                                | 55.1            | 72.6 | 78.4 | 74.8 |
| 17. It is not necessary to report errors which do not result in adverse outcomes for the patient <sup>†</sup>                                  | 60.8                                | 57.6            | 70.7 | 69.8 | 48.8 |
| 18. Doctors have a responsibility to disclose errors to patients only if the errors result in patient harm.                                    | 80.8                                | 55              | 85.2 | 93.8 | 94.5 |
| 19. All medical errors should be reported.                                                                                                     | 66.7                                | 52.6            | 61.9 | 71.6 | 81   |
| <b>team functioning</b>                                                                                                                        | 76.9                                | 55.7            | 77.5 | 87.6 | 91.8 |
| 20. Better multidisciplinary teamwork will reduce medical errors.                                                                              | 69.2                                | 54.9            | 64.5 | 75.4 | 84.5 |

|                                                                                                                                          |       |       |       |       |       |
|------------------------------------------------------------------------------------------------------------------------------------------|-------|-------|-------|-------|-------|
| 21. Teaching students teamwork skills will reduce medical errors.                                                                        | 84.7  | 56.6  | 90.5  | 99.8  | 99.1  |
| <b>patient involvement in reducing errors</b>                                                                                            | 84.7  | 56.7  | 90.2  | 99.4  | 98.7  |
| 22. Patients have an important role in preventing medical errors.                                                                        | 85.1  | 56.1  | 90.5  | 99.5  | 98.6  |
| 23. Encouraging patients to be more involved in their care can help to reduce the risk of medical errors occurring.                      | 84.5  | 57.3  | 90    | 99.3  | 98.8  |
| <b>importance of patient safety in the curriculum</b>                                                                                    | 71.6  | 56.4  | 78.5  | 82.4  | 74.4  |
| 24. Teaching students about patient safety should be an important priority in medical students' training.                                | 84.1  | 55.9  | 89.5  | 99.1  | 98.6  |
| 25. Patient safety issues cannot be taught; they can only be learned through clinical experience, which is gained when one is qualified. | 46.6  | 55.8  | 55.4  | 50    | 25.3  |
| 26. Learning about patient safety issues before I qualify will enable me to become a more effective doctor.                              | 85    | 57.5  | 90.7  | 99.3  | 99.4  |
| Overall                                                                                                                                  | 678.8 | 498.9 | 713.3 | 778.9 | 767.2 |

□ A = Harbin Medical University.

□ B = Qiqihar Medical University.

□ C = MuDanJiang Medical University.

□ D = Medical College of Jiamusi University.

‡ Positive responses are those with "agree" or "strongly agree." The denominator for each question may vary because not every student responded to every question in the survey.

† Negatively worded item, where the percent positive response is based on those who responded, "strongly disagree" or "disagree."

Table 3. Items on the APSQ-III that demonstrated significant differences between the five cohorts.

| S<br>c<br>h<br>o<br>o<br>l<br>s | Grades | Overall | Positive responses (%) <sup>†</sup>                       |                                          |                                              |                            |                                                      |                                          |                         |                                                 |                                                         |
|---------------------------------|--------|---------|-----------------------------------------------------------|------------------------------------------|----------------------------------------------|----------------------------|------------------------------------------------------|------------------------------------------|-------------------------|-------------------------------------------------|---------------------------------------------------------|
|                                 |        |         | Pati<br>ent<br>safet<br>y<br>traini<br>ng<br>recei<br>ved | Error<br>reportin<br>g<br>confide<br>nce | Workin<br>g hours<br>as an<br>error<br>cause | Error<br>inevitabi<br>lity | Professional<br>incompetence<br>as an error<br>cause | Discl<br>osure<br>respo<br>nsibili<br>ty | Team<br>functi<br>oning | Patient<br>involvement<br>in reducing<br>errors | Importance<br>of patient<br>safety in the<br>curriculum |
| A                               | first  | 632     | 78.6                                                      | 73.4                                     | 79.7                                         | 71.9                       | 56.6                                                 | 66.4                                     | 73.9                    | 80.8                                            | 50.7                                                    |
|                                 | second | 591.3   | 74.3                                                      | 62.9                                     | 74.4                                         | 71.4                       | 56                                                   | 66.6                                     | 64                      | 71.9                                            | 49.8                                                    |
|                                 | third  | 176.4   | 57.1                                                      | 52.9                                     | 56.2                                         | 52.8                       | 51.9                                                 | 51.4                                     | 57.5                    | 55.1                                            | 41.5                                                    |
|                                 | fourth | 391     | 43.1                                                      | 40                                       | 40.5                                         | 45.4                       | 51.1                                                 | 48.7                                     | 42.7                    | 42.8                                            | 37.6                                                    |
|                                 | fifth  | 401     | 45.2                                                      | 46.4                                     | 42.6                                         | 41.1                       | 51.8                                                 | 46.6                                     | 51.2                    | 42.7                                            | 33.7                                                    |
| B                               | first  | 751.2   | 99.4                                                      | 84.7                                     | 95.8                                         | 86                         | 61.5                                                 | 78.2                                     | 84.1                    | 98.9                                            | 62.6                                                    |
|                                 | second | 760.8   | 97.2                                                      | 86.8                                     | 95                                           | 91.1                       | 66.3                                                 | 78.5                                     | 87                      | 99.1                                            | 59.8                                                    |
|                                 | third  | 717.8   | 98                                                        | 72.7                                     | 95.9                                         | 83.8                       | 59.2                                                 | 63.3                                     | 81.3                    | 100                                             | 63.5                                                    |
|                                 | fourth | 745.1   | 98.9                                                      | 86.5                                     | 97.3                                         | 84.4                       | 60.9                                                 | 77.5                                     | 78.8                    | 97.3                                            | 63.5                                                    |
|                                 | fifth  | 507     | 61.4                                                      | 51.9                                     | 61.2                                         | 61.6                       | 51.5                                                 | 57.4                                     | 56.1                    | 58.7                                            | 47.2                                                    |
| C                               | first  | 771.6   | 99.1                                                      | 90.3                                     | 96.1                                         | 91.9                       | 62                                                   | 84.1                                     | 86.4                    | 98.2                                            | 63.5                                                    |
|                                 | second | 761     | 99.6                                                      | 90.3                                     | 98.3                                         | 84.2                       | 63.6                                                 | 81.2                                     | 81.1                    | 99.5                                            | 63.2                                                    |
|                                 | third  | 757.6   | 100                                                       | 83.4                                     | 97.9                                         | 87.1                       | 60.7                                                 | 78.2                                     | 91                      | 100                                             | 59.3                                                    |
|                                 | fourth | 743.3   | 97                                                        | 77.9                                     | 96.9                                         | 86.9                       | 60                                                   | 75.2                                     | 87.2                    | 95.7                                            | 66.5                                                    |
|                                 | fifth  | 744.4   | 99.7                                                      | 79.9                                     | 99.4                                         | 85.2                       | 58.5                                                 | 70.9                                     | 92.6                    | 100                                             | 58.2                                                    |
| D                               | first  | 751.4   | 99.1                                                      | 87.1                                     | 99.2                                         | 86                         | 63.3                                                 | 72.7                                     | 90.2                    | 97.1                                            | 56.7                                                    |
|                                 | second | 752.2   | 98.5                                                      | 88.7                                     | 99.2                                         | 83.2                       | 61.3                                                 | 77.5                                     | 91                      | 98.2                                            | 54.6                                                    |
|                                 | third  | 745.4   | 97.1                                                      | 87.2                                     | 97.2                                         | 82.9                       | 59.9                                                 | 74.8                                     | 89.3                    | 99.2                                            | 57.8                                                    |
|                                 | fourth | 739.7   | 100                                                       | 96.1                                     | 100                                          | 74.2                       | 52.3                                                 | 67                                       | 97.7                    | 100                                             | 52.4                                                    |
|                                 | fifth  | 738.3   | 100                                                       | 78                                       | 100                                          | 79.3                       | 41                                                   | 74.9                                     | 100                     | 100                                             | 65.1                                                    |

<sup>□</sup>A = Harbin Medical University.

<sup>□</sup>B = Qiqihar Medical University.

<sup>□</sup>C = MuDanJiang Medical University.

<sup>□</sup>D = Medical College of Jiamusi University.

<sup>†</sup> Positive responses are those who responded, "agree" or "strongly agree." The denominator for each question may vary because not every student responded to every question in the survey.

# BMJ Open

## Perceptions of patient safety culture among medical students: A cross-sectional investigation in Heilongjiang Province, China

|                                 |                                                                                                                                                                                                                                                                                                                                                                                                                                                                                                                                                                                                                                                                                                                                                                                                                                                                                                                                                                                                                                                                                                                                                                                                                                                                                                                                                                                                                                                                                                                                                                                                                                                                                        |
|---------------------------------|----------------------------------------------------------------------------------------------------------------------------------------------------------------------------------------------------------------------------------------------------------------------------------------------------------------------------------------------------------------------------------------------------------------------------------------------------------------------------------------------------------------------------------------------------------------------------------------------------------------------------------------------------------------------------------------------------------------------------------------------------------------------------------------------------------------------------------------------------------------------------------------------------------------------------------------------------------------------------------------------------------------------------------------------------------------------------------------------------------------------------------------------------------------------------------------------------------------------------------------------------------------------------------------------------------------------------------------------------------------------------------------------------------------------------------------------------------------------------------------------------------------------------------------------------------------------------------------------------------------------------------------------------------------------------------------|
| Journal:                        | <i>BMJ Open</i>                                                                                                                                                                                                                                                                                                                                                                                                                                                                                                                                                                                                                                                                                                                                                                                                                                                                                                                                                                                                                                                                                                                                                                                                                                                                                                                                                                                                                                                                                                                                                                                                                                                                        |
| Manuscript ID                   | bmjopen-2017-020200.R1                                                                                                                                                                                                                                                                                                                                                                                                                                                                                                                                                                                                                                                                                                                                                                                                                                                                                                                                                                                                                                                                                                                                                                                                                                                                                                                                                                                                                                                                                                                                                                                                                                                                 |
| Article Type:                   | Research                                                                                                                                                                                                                                                                                                                                                                                                                                                                                                                                                                                                                                                                                                                                                                                                                                                                                                                                                                                                                                                                                                                                                                                                                                                                                                                                                                                                                                                                                                                                                                                                                                                                               |
| Date Submitted by the Author:   | 10-Jan-2018                                                                                                                                                                                                                                                                                                                                                                                                                                                                                                                                                                                                                                                                                                                                                                                                                                                                                                                                                                                                                                                                                                                                                                                                                                                                                                                                                                                                                                                                                                                                                                                                                                                                            |
| Complete List of Authors:       | <p>Liu, He; Hebei Medical University, Office of Academic Affairs</p> <p>Li, Ying; Harbin Medical University, Department of Health Policy and Hospital Management</p> <p>Zhao, Siqi; Hebei Medical University, Department of Nursing Psychology and Humanities</p> <p>Jiao, Mingli; Harbin Medical University, Health policy ; Chinese Academy of Social Science, Institute of Quantitative &amp; Technical Economics</p> <p>Lu, Yan; Jiamusi University, School of Public Health</p> <p>Liu, Jinghua; QiQihar Medical University</p> <p>Jiang, Kexin; Harbin Medical University, Department of Health Policy and Hospital Management, School of Public Health</p> <p>Fang, Huiying; Harbin Medical University, Department of Health, Policy and Hospital Management, School of Public Health</p> <p>Sun, Peihang; Harbin Medical University, Department of Health, Policy and Hospital Management, School of Public Health</p> <p>Li, Peng; Harbin Medical University, Department of Health Policy and Hospital Management, School of Public Health</p> <p>Wang, Yameng; Harbin Medical University, Department of Health Policy and Hospital Management</p> <p>Jia, Haonan; Harbin Medical University, Department of Health Policy and Hospital Management, School of Public Health</p> <p>Wu, Yuming; Hebei Medical University, Department of physiology, School of basic medicine</p> <p>Liu, Limin; The 2nd Affiliated Hospital of Harbin Medical University, Medical record room</p> <p>Zhao, Yanming; The 2nd Affiliated Hospital of Harbin Medical University, CT room</p> <p>Wu, Qunhong; Harbin Medical University, Department of Social Medicine, School of Public Health</p> |
| <b>Primary Subject Heading</b>: | Public health                                                                                                                                                                                                                                                                                                                                                                                                                                                                                                                                                                                                                                                                                                                                                                                                                                                                                                                                                                                                                                                                                                                                                                                                                                                                                                                                                                                                                                                                                                                                                                                                                                                                          |
| Secondary Subject Heading:      | Health policy, Medical education and training                                                                                                                                                                                                                                                                                                                                                                                                                                                                                                                                                                                                                                                                                                                                                                                                                                                                                                                                                                                                                                                                                                                                                                                                                                                                                                                                                                                                                                                                                                                                                                                                                                          |
| Keywords:                       | medical education, patient safety, medicine students                                                                                                                                                                                                                                                                                                                                                                                                                                                                                                                                                                                                                                                                                                                                                                                                                                                                                                                                                                                                                                                                                                                                                                                                                                                                                                                                                                                                                                                                                                                                                                                                                                   |
|                                 |                                                                                                                                                                                                                                                                                                                                                                                                                                                                                                                                                                                                                                                                                                                                                                                                                                                                                                                                                                                                                                                                                                                                                                                                                                                                                                                                                                                                                                                                                                                                                                                                                                                                                        |

1  
2  
3  
4  
5  
6  
7  
8  
9  
10  
11  
12  
13  
14  
15  
16  
17  
18  
19  
20  
21  
22  
23  
24  
25  
26  
27  
28  
29  
30  
31  
32  
33  
34  
35  
36  
37  
38  
39  
40  
41  
42  
43  
44  
45  
46  
47  
48  
49  
50  
51  
52  
53  
54  
55  
56  
57  
58  
59  
60

SCHOLARONE™  
Manuscripts

For peer review only

1 **Perceptions of patient safety culture among medical students: A cross-sectional**  
 2 **investigation in Heilongjiang Province, China**

3 **He Liu<sup>1†</sup>, Ying Li<sup>2†</sup>, Siqi Zhao<sup>3</sup>, Mingli Jiao<sup>2,4\*</sup>, Yan Lu<sup>5</sup>, Jinghua Liu<sup>6</sup>, Kexin Jiang<sup>2</sup>, Huiying**  
 4 **Fang<sup>2</sup>, Peihang Sun<sup>2</sup>, Peng Li<sup>2</sup>, Yameng Wang<sup>2</sup>, Haonan Jia<sup>2</sup>, Yuming Wu<sup>7\*</sup>, Limin Liu<sup>8</sup>,**  
 5 **Yanming Zhao<sup>9</sup>, Qunhong Wu<sup>10\*</sup>**

6 1 Office of Academic Affairs, Hebei Medical University, 361 Zhongshan East Road, Chang'an Di  
 7 strict, Shijiazhuang 050017, China; E-Mail: 771773207@qq.com (H.L.)

8 2 Department of Health Policy and Hospital Management, School of Public Health, Harbin  
 9 Medical University, 157 Baojian Road, Nangang District, Harbin 150081, China;  
 10 E-Mails: 1690342267@qq.com (Y.L.); 576732775@qq.com (S.Z.);  
 11 jiangkexin1994@163.com (K.J.); 565453428@qq.com (H.F.); 745450570@qq.com (P.S.);  
 12 18845146293@163.com (P.L.); 984453904@qq.com (Y.W.); 495150755@163.com (H.J.)

13 3 Department of Psychology and Humanities Nursing, Hebei Medical University, Donggang  
 14 Road 48, Yuhua District, Shijiazhuang 050017, China; E-Mail:  
 15 siqizhao1992@foxmail.com (S.Z.)

16 4 Institute of Quantitative & Technical Economics, Chinese Academy of Social Science,  
 17 5 Jian guo men nei Road, Dongcheng District, Beijing 100000, China; E-Mail: minglijiao@  
 18 126.com (M.J.)

19 5 School of Public Health, Jiamusi University, Jiamusi 154007, China; E-Mail:  
 20 yanlulyan@163.com (Y.L.)

21 6 School of Public Health, QiQihar Medical University, QiQihar 161006, China; E-Mail:  
 22 liujinghuaahl@126.com (J.L.)

23 7 Department of physiology, School of basic medicine, Hebei Medical University, 361 Zhongshan  
 24 Road, Changan District, Shijiazhuang 050017, China; E-Mail: wuyanmingymw@126.com  
 25 (Y.W.)

26 8 Medical record room, The 2nd Affiliated Hospital of Harbin Medical University,  
 27 Harbin 150081, China; E-Mail: liuliminlml@126.com (L.L.)

28 9 CT room, The 2nd Affiliated Hospital of Harbin Medical University, Harbin 150081,  
 29 China; E-Mail: yanmingzhaozym@163.com (Y.Z.)

30 10 Department of Social Medicine, School of Public Health, Harbin Medical University, 157  
 31 Baojian Road, Nangang District, Harbin 150081, China;  
 32 E-Mails: wuqunhong12345@163.com (Q.W.)

34 †These authors contributed equally to this work.

35 \*Correspondence : minglijiao@126.com; wuqunhong12345@163.com;  
 36 wuyanmingymw@126.com



1  
2  
3 39 **Abstract**  
4

5 40 **Objectives:** Medical school education plays an important role in promoting patient  
6  
7 41 safety. The present study aimed to assess medical students' perceptions of patient  
8  
9 42 safety culture, and also to identify the educational needs of these students and provide  
10  
11 43 evidence on the most important content for a curriculum relating to patient safety.

12 44 **Method:** A cross-sectional study was conducted within each of the four medical  
13  
14 45 universities in Heilongjiang province. First through fifth-year medical students  
15  
16 46 completed an anonymous questionnaire—the Attitudes toward Patient Safety  
17  
18 47 Questionnaire III (APSQ-III). Differences in responses across the four universities  
19  
20 48 and cohorts were analysed.

21 49 **Results:** Overall perceptions of patient safety cultures across the four medical  
22  
23 50 universities were positive. The highest positive response rate was for, 'I have a good  
24  
25 51 understanding of patient safety issues as a result of my undergraduate medical  
26  
27 52 training' (range: 58.4%–99.8%), while the lowest positive response rate was for,  
28  
29 53 'medical errors are a sign of incompetence' (14.7%–47.9%).

30  
31 54 Younger cohorts had a better awareness of working hours and teamwork. However,  
32  
33 55 fourth and fifth-year students had a better awareness of error inevitability. The lowest  
34  
35 56 positive scores between cohorts included items related to 'professional incompetence  
36  
37 57 as an error cause' and 'disclosure responsibility'.

38 58 **Conclusions:** Perceptions of patient safety culture among students from various  
39  
40 59 medical schools were positive, suggesting a willingness to learn about this important  
41  
42 60 issue. Policy makers should place a greater focus on varied educational needs across  
43  
44 61 schools and cohorts to establish proper curricula.

45 62 **Keywords:** medical education, patient safety, medicine students  
46  
47 63

48  
49 64 **Strengths and limitations of this study**

50  
51 65 Strengths:

- 52  
53 66 ● This is the first use of the APSQ-III to compare patient safety in different schools  
54  
55 67 and cohorts within a developing country (China)  
56  
57 68 ● We covered almost all of the medical colleges within a rather large province  
58  
59  
60

- 1  
2  
3 69 ● This study provides the necessary evidence for educators to design future  
4 interventions and create a sense of focus on patient safety in medical education  
5  
6

7 Limitations:

- 8  
9 72 ● APSQ-III is a new instrument, the reliability and validity of which have not yet  
10 been retested  
11  
12 74 ● Our study is limited by the potential for non-response bias. Students who  
13 responded to the survey may have been more likely than their peers to be  
14 interested in patient safety, which may have led to inflation of the attitude ratings  
15  
16  
17

## 18 1. Introduction

19 Hippocrates, who is considered the ‘father of medicine’, proposed the ‘Hippocratic  
20 Oath’. This oath is taken by medical students worldwide to promote a rigorous and  
21 enthusiastic attitude toward medical education. Hence, the maintenance and promotion  
22 of human safety is of utmost importance.  
23  
24

25 However, as noted a decade ago by the Institute of Medicine (IOM), accountability  
26 for patient safety requires a multi-layered approach—one that addresses system errors  
27 as well as human ones—to help prevent medical errors [1-3]. Advancements in patient  
28 safety require a fundamental culture change in healthcare. Reducing harm through an  
29 improved safety culture is a global priority [2]. Policy makers, payers, and groups  
30 (such as the Agency for Healthcare, Research, and Quality (AHRQ), National Patient  
31 Safety Agency, and World Health Organization) have resulted in numerous safety  
32 initiatives at the national and institutional level [4]. However, most measures have  
33 targeted doctors, managers, and other health care professionals. Less attention has  
34 been paid to medical students, the next generation of medical scientists [5].  
35  
36

37 The clinical practice stage is key for acquiring practical skills among medical students,  
38 at which point the student begins to shift roles from ‘student’ to ‘doctor’. To protect  
39 the rights of teachers and medical students and the interests of patients, and to ensure  
40 the quality of medical education, the National Health and Family Planning  
41 Commission and the Ministry of Education of the People’s Republic of China develop  
42 clear regulatory requirements for medical students and medical graduates in clinical  
43 trial practice. While clinical teachers bear legal responsibility for medical disputes due  
44  
45  
46  
47  
48  
49  
50  
51  
52  
53  
54  
55  
56  
57  
58  
59  
60

1  
2  
3 99 to incorrect guidance, when medical students conduct clinical treatment activities  
4  
5 100 without the permission of the clinical teacher, individuals bear the corresponding legal  
6  
7 101 responsibility.

8  
9 102 There is now a growing awareness that students are influenced not only by what is  
10  
11 103 taught in the formal curriculum, but also by unspoken, powerful messages conveyed  
12  
13 104 through interactions with superiors and educators during students' clinical practice  
14  
15 105 [6-8]. For example, although students are taught to wash their hands before interacting  
16  
17 106 with patients, it is not until they witness doctors engaging in this behaviour within a  
18  
19 107 clinical setting that this requirement is truly understood.

20  
21 108 One of the medical teachers from Harbin Medical University said that the main  
22  
23 109 purpose of clinical practice is to form proper 'clinical thinking'. This lays a solid  
24  
25 110 foundation for the student's future work. My teachers not only provided us with  
26  
27 111 knowledge but exemplars of proper work ethic and style. Thus, I am attempting to  
28  
29 112 pass on these characteristics to students.

30  
31 113 Medical school curricula need to be strengthened to comprehensively advocate safety  
32  
33 114 training. Work within this 'hidden curriculum' can deal with students who may engage  
34  
35 115 in or be taught practices that oppose content from the formal curriculum, professional  
36  
37 116 values, and even safe patient care. During pressure situations, such as those  
38  
39 117 experienced during emergencies, doctors can be challenged with making proper  
40  
41 118 decisions in a timely fashion, which could be an enormous threat to patient safety [9].

42  
43 119 Therefore, the nation's medical schools, teaching hospitals, and health systems  
44  
45 120 recognize that achieving greater patient safety requires more than a brief course in an  
46  
47 121 already crowded medical school curriculum. There is a need for a fundamental culture  
48  
49 122 change across all phases of medical education. [10].

50  
51 123 Some scholars have addressed issues related to improved patient safety. For instance,  
52  
53 124 we previously observed that open communication, non-punitive responses to errors,  
54  
55 125 and professionalism are key areas of concern regarding medical students' perceptions  
56  
57 126 of the patient safety culture [11]. Leung investigated perspectives of the patient safety  
58  
59 127 culture among medical students in Hong Kong and Singapore and compared students'  
60  
128 educational needs. However, only a single cohort was surveyed; this study did not

1  
2  
3 129 consider differences in educational need across cohorts [12].  
4  
5 130 Patient safety education in areas with low medical standards and high medical risks,  
6  
7 131 as is the case in developing countries like China, is in its infancy [13]. While a few  
8  
9 132 reports have explored safety education content and teaching methods in China [14],  
10  
11 133 patient safety education has not been fully implemented within curricula and clinical  
12  
13 134 practice. Lack of knowledge regarding patient safety remains a common reason for  
14  
15 135 medical errors [15]. The first important question, then, is to determine what  
16  
17 136 knowledge medical students are specifically lacking. Additionally, information is  
18  
19 137 needed regarding cognitive components of students' perceptions of patient safety  
20  
21 138 culture. Finally, we need to assess students' explicit educational needs and what  
22  
23 139 should be focused upon within a patient safety curriculum. Understanding these  
24  
25 140 various components are the first steps in providing patient safety education.  
26  
27 141 Low levels of hospital management, limited personal technology, and other issues are  
28  
29 142 prevalent in developing countries. Thus, patient safety problems tend to be more  
30  
31 143 serious than what is observed in developed countries [16]. Addressing safety  
32  
33 144 education for medical students in developing countries is particularly urgent. The  
34  
35 145 WHO Director General, Margaret Chan, highlighted patient safety as a key task going  
36  
37 146 forward [17]. This led to the publication of a Chinese version of the 'WHO Patient  
38  
39 147 Safety Course Guide' in July 2012 in support of a resolution from the Ministry of  
40  
41 148 Health (National Health and Family Planning Commission of the People's Republic  
42  
43 149 of China).  
44  
45 150 Heilongjiang province, as the healthcare centre of Northeast China, has the largest  
46  
47 151 area and availability of health resources, while Harbin Medical University has the best  
48  
49 152 educational reputation with the most stringent entrance requirements. Qiqihar Medical  
50  
51 153 University, Mudanjiang Medical University, and the Medical College of Jiamusi  
52  
53 154 University are also prominent (along with their three-level hospitals) in Heilongjiang  
54  
55 155 province. The China Health Statistics Yearbook (2014) revealed that there are 21,158  
56  
57 156 medical and health institutions in the Heilongjiang region, with medical services  
58  
59 157 covering about 3,813 thousand people from the local population [15]. This is  
60 158 equivalent to three times the population of Beijing and half of the UK population.

1  
2  
3 159 Understanding the baseline patient safety culture, and identifying important and  
4  
5 160 urgent educational needs, is critical for the effective design and successful  
6  
7 161 implementation of education programs at Heilongjiang's medical institutions [15].  
8  
9 162 Thus, the present study evaluated patient safety culture from students' perspectives.  
10  
11 163 This was done to explore factors critical to transforming patient safety perspectives  
12  
13 164 and address students' educational needs.

## 14 165 **2. Methods**

### 16 166 **2.1 Sampling and Data collection**

17  
18 167 We conducted a cross-sectional survey within the four, aforementioned medical  
19  
20 168 universities in Heilongjiang province. Cooperation was obtained from managers in the  
21  
22 169 student offices. Some schools offered courses in doctor-patient relations and  
23  
24 170 evidence-based medicine, but there was no dedicated and systematic patient safety  
25  
26 171 course. None of the students had received any prior formal teaching on patient safety,  
27  
28 172 enabling a baseline assessment of safety culture among these students. We used  
29  
30 173 systematic random sampling to select 800 medical students from a roster of all  
31  
32 174 medical undergraduates at each school. We provided these students with detailed  
33  
34 175 explanations of the objective of this investigation; some students expressed interest in  
35  
36 176 participating in the survey, while others declined to participate. Students who were  
37  
38 177 willing to participate in the investigation were given two days to complete the  
39  
40 178 questionnaire anonymously; they were asked to then return it to a box provided in the  
41  
42 179 counselor's office. Respondents' names and other identifiers were not collected. Using  
43  
44 180 this procedure, we obtained 2489 valid questionnaires (total response rate: 78.1%). Of  
45  
46 181 the students who participated, 726 (response rate: 90.8%) came from Harbin Medical  
47  
48 182 University, 631 (78.9%) from Qiqihar Medical University, 459 (57.4%) from  
49  
50 183 Mudanjiang Medical University, and 682 (85.3%) from the Medical College of  
51  
52 184 Jiamusi University.

### 51 185 **2.2 Questionnaire**

52  
53 186 The survey instrument used was the Attitudes toward Patient Safety Questionnaire III  
54  
55 187 (APSQ-III) [12,18-21], which was specifically designed for students and covers nine  
56  
57 188 key factors related to patient

189 safety culture. The APSQ-III assesses various factors regarding patient safety culture,  
190 rather than examining differences in patient safety education. Therefore, this measure  
191 can more accurately reflect realistic educational needs [12].

192 The questionnaire consists of 26 items covering nine key patient safety factors:

193 (a) patient safety training received (items 1–3);

194 (b) error reporting confidence (items 4–6);

195 (c) working hours as an error cause (items 7–9);

196 (d) error inevitability (items 10–12);

197 (e) professional incompetence as an error cause (items 13–16);

198 (f) disclosure responsibility (items 17–19);

199 (g) team functioning (items 20 and 21);

200 (h) patient involvement in reducing error (items 22 and 23);

201 and (i) importance of patient safety in the curriculum (items 24–26).

### 202 **2.3 Data analyses**

203 Responses were recorded on a five-point Likert scale, with 5 = strongly agree and 1 =  
204 strongly disagree. Responses were grouped into agree (i.e. 4 or 5) and disagree (i.e. 1  
205 or 2), and overall percentages were obtained [12]. The chi-square test was used to  
206 compare the rate of positive responses between schools and cohort subgroups. We  
207 also excluded unanswered questions from the analyses. Level of significance was set  
208 at  $p < 0.05$ .

### 209 **2.4 Ethics approval**

210 The study protocol was reviewed and approved by the Research Ethics Committee of  
211 Harbin Medical University. Before the survey, approval was also obtained from each  
212 school. All participants voluntarily and anonymously participated and provided their  
213 written informed consent.

## 214 **3. Results**

215 Of the Year 1–5 students who responded to the demographic questions, 1,055 (42.4%)  
216 were male, and 1,435 (57.4%) were female. Response rates varied between cohorts  
217 (from first to fifth-years): 399 (16%); 483 (19.3%); 587 (23.5%); 746 (29.9%); 283  
218 (11.3%) (Table 1).

1  
2  
3 219 Table 2 summarizes safety culture perceptions, by survey domain, for the combined  
4  
5 220 group and the four subgroups. The overall highest scores were for, ‘patient safety  
6  
7 221 training received’, ‘patient involvement in reducing errors’, ‘I have a good  
8  
9 222 understanding of patient safety issues as a result of my undergraduate medical  
10  
11 223 training’, and ‘patients have an important role in preventing medical errors’. The  
12  
13 224 lowest average domain scores were for, ‘professional incompetence as an error cause’,  
14  
15 225 ‘disclosure responsibility’, ‘medical errors are a sign of incompetence’, and ‘it is not  
16  
17 226 necessary to report errors, which do not result in adverse outcomes for the patient’.

18 227 Specific to each medical institution, the highest level of positive safety perceptions  
19  
20 228 was from Mudanjiang Medical College, with the highest score for the ‘patient safety  
21  
22 229 training received’ domain. Jiamusi Medical College was second with their highest  
23  
24 230 domain score for ‘working hours as an error cause’. Qiqihar Medical University  
25  
26 231 reported their highest score for ‘patient involvement in reducing errors’. The lowest  
27  
28 232 score among these three institutions was for ‘professional incompetence as an error  
29  
30 233 cause’. The lowest positive patient safety perceptions came from Harbin Medical  
31  
32 234 University, with their highest domain score for ‘patient safety training received’, and  
33  
34 235 their lowest score for ‘error reporting confidence’. There was a statistically significant  
35  
36 236 difference between schools on responses to all nine key patient safety factors.

37 237 Table 3 summarizes safety culture perceptions based on survey domains for the  
38  
39 238 combined group and for the five subgroups. The table displays results sorted by safety  
40  
41 239 domain score. Perceptions of patient safety culture varied based on cohort. All five  
42  
43 240 cohorts had a positive perception of ‘patient safety training received’ and ‘patient  
44  
45 241 involvement in reducing errors’. Moreover, first and second-year students’ perceptions  
46  
47 242 of ‘working hours as an error cause’ were high. Third-year students had a better  
48  
49 243 awareness of ‘team functioning’. In addition to the aforementioned domains, fourth  
50  
51 244 and fifth-year students also had a deep understanding of ‘error inevitability’. The  
52  
53 245 lowest scores were in the ‘professional incompetence as an error cause’ and  
54  
55 246 ‘importance of patient safety in the curriculum’ domains for all cohorts. There was a  
56  
57 247 significant difference ( $p < 0.05$ ) between cohorts on responses to the factors ‘patient  
58  
59 248 safety training received’, ‘error reporting confidence’, ‘working hours as an error

1  
2  
3 249 cause', 'error inevitability', 'team functioning', 'patient involvement in reducing  
4  
5 250 errors', and 'importance of patient safety in the curriculum'.  
6

#### 7 251 **4. Discussion**

8  
9 252 As patient safety is a top health care priority, all medical undergraduates should have  
10  
11 253 the necessary capacity to ensure minimal patient harm as they embark on their future  
12  
13 254 career. Education and training are key to achieving this goal [4]. As medical students  
14  
15 255 are an integral part of our future health care systems, their experiences during school  
16  
17 256 (and their perceptions of patient safety culture) have an important influence on their  
18  
19 257 attitudes toward patient safety and their behaviours within this domain [22]. Screening  
20  
21 258 perceptions in key areas regarding patient safety is an opportunity to improve clinical  
22  
23 259 acumen and future medical education. The present findings provide explicit medical  
24  
25 260 student perspectives relevant to critical clinical services. Such information can be  
26  
27 261 utilized by medical directors and clinical service supervisors for real-time assessment  
28  
29 262 while promoting a safety culture. The APSQ-III has a stable factor structure and  
30  
31 263 criterion validity; it can also distinguish between different student subgroups [12]. We  
32  
33 264 conducted the present study to demonstrate how the APSQ-III can identify differences  
34  
35 265 between different cohorts across several medical universities in Northeast China.

36  
37 266 Overall, our study highlights that medical student opinions/evaluations regarding  
38  
39 267 patient safety cultures are positive [23]. Interestingly, although none of our  
40  
41 268 participants had received any formal teaching on the subject, students from all four  
42  
43 269 universities were more likely to report having been trained well in the subject (84.9%).  
44  
45 270 This finding is similar to that of a previous study by Gilberto Ka Kit Leung in Hong  
46  
47 271 Kong [12], and may be due to a common psychological phenomenon of escaping  
48  
49 272 responsibility among students in China, which refers to the notion that students in this  
50  
51 273 culture are struggling to cope with and protect themselves in an intensely hierarchical  
52  
53 274 environment. This means that not only are they afraid to tell the truth, but they also  
54  
55 275 fear the effects of doing so on teachers' evaluations of them. Many students do not  
56  
57 276 want to acknowledge errors or defects, and may be unwilling to report problems to  
58  
59 277 avoid poor evaluations or to fit in with their teams [4]. Thus, we may need to be more  
60  
278 vigilant to prevent this fear of exposing deficiencies.



1  
2  
3 279 Compared with results from Leung, their three highest scores were for ‘working hours  
4 280 as an error cause’, ‘error inevitability’, and ‘importance of patient safety in the  
5 281 curriculum’. ‘Patient involvement in reducing error’ and ‘team functioning’ received  
6 282 the lowest overall scores in that previous study [12]. In the present study, ‘patient  
7 283 involvement in reducing errors’ and ‘patient safety training received’ were the most  
8 284 positively endorsed domains, while ‘professional incompetence as an error cause’ and  
9 285 ‘disclosure responsibility’ were strong barriers to positive student patient safety  
10 286 perceptions. In contrast with students in Hong Kong, mainland students responded  
11 287 positively to items relating to ‘patient involvement in reducing errors’. A possible  
12 288 reason for this is that patients in Hong Kong must follow the arrangements made by  
13 289 public medical institutions with regard to waiting lists, hospitalisation, and surgery, in  
14 290 accordance with the process established for their illness. They can’t choose their  
15 291 doctors for themselves, but are generally trusting of doctors and hospitals. In  
16 292 mainland China, however, the patient’s understanding of their diagnosis and treatment  
17 293 has been continuously improving, and the traditional medical model has gradually  
18 294 been replaced by active patient participation [24]. The process of medical  
19 295 decision-making is undertaken by the doctor and patient together, and the patient has  
20 296 the right to choose their doctor independently. In addition, medical staff often  
21 297 encourage patients and their families to participate in procedures relating to diagnosis  
22 298 and treatment [25]. This may include encouraging patients or family members to  
23 299 participate in examining the label on an infusion bottle for the name of the drug,  
24 300 reading drug information, and so on. Furthermore, previous work has shown that  
25 301 patient participation can reduce the occurrence of medical errors [26]. Therefore,  
26 302 Chinese medical students have positive attitudes on the item.  
27 303 Our study found that responses to the ‘professional incompetence as an error cause’  
28 304 domain were negative, especially for the following items: ‘medical errors are a sign of  
29 305 incompetence’ (32.5%), ‘medical students generally consider errors as inevitable’  
30 306 (74.9%), and ‘even the most experienced and competent doctors make errors’ (84.3%);  
31 307 however, the students lack a proper understanding regarding the reasons for errors.  
32 308 Our results are similar to those of Moskowitz et al., who found that students in the US

1  
2  
3 309 were uncertain what defined an error and what led to medical errors [19].  
4  
5 310 Medical students generally agreed that medical errors are caused by humans and a  
6  
7 311 sign of incompetence (32.5%). This shows that the present sample of medical students  
8  
9 312 lacked awareness regarding systematic errors. Long working hours and medical staff  
10  
11 313 incompetence were noted by several students as important reasons for errors. This  
12  
13 314 may indicate that the students were placing an emphasis on human factors resulting in  
14  
15 315 errors. This is in line with findings from a previous study involving Hong Kong  
16  
17 316 students in which a majority of students reported that ‘if they work hard, they can  
18  
19 317 eliminate errors’ was an effective strategy for preventing future errors [27]. These  
20  
21 318 findings could suggest a need for emphasizing the potential role of other factors (e.g.  
22  
23 319 system errors and procedural complexity) during the occurrence of medical errors.  
24  
25 320 Several students reported positive evaluations of their error reporting confidence, but  
26  
27 321 a punitive evaluation surrounding their responsibility in reporting (i.e. what and how  
28  
29 322 to report when witnessing a problem with patient care). Medical students’ high  
30  
31 323 confidence in reporting medical errors (74.9%) is similar to the results of a Turkish  
32  
33 324 study conducted by Karaoglu et al [28-29]. They found that 60.7% (n = 147) of  
34  
35 325 students stated that they would report an error to the hospital committee if they,  
36  
37 326 themselves, made a medical error. Furthermore, 68.6% (n = 166) of the students stated  
38  
39 327 that they would report a medical error they witnessed.  
40  
41 328 In Flin et al.’s study, the majority of students stated they would speak up about an  
42  
43 329 error. However, this result was a bit confusing, since students also endorsed the item,  
44  
45 330 ‘it is not necessary to report errors that do not result in adverse outcomes for the  
46  
47 331 patient’ (60.8%)[30]. More than 50% of students from the Medical College at Jiamusi  
48  
49 332 University agreed with this statement, as well. All members of the medical team,  
50  
51 333 including medical students, should be able to recognize unsafe conditions, report  
52  
53 334 errors, and improve error disclosure if not sufficiently conducted. This persistent  
54  
55 335 cultural change should contribute to the eradication of errors and reduce patient safety  
56  
57 336 concerns [31-33].  
58  
59 337 Several students agreed with the following statements: ‘my training is preparing me to  
60  
338 understand the causes of medical errors’ (84.8%) and ‘I have a good understanding of

1  
2  
3 339 patient safety issues as a result of my undergraduate medical training' (85.2%). This  
4  
5 340 illustrates that medical students have high expectations regarding patient safety  
6  
7 341 education, which is in line with the findings of Madigosky et al [34]. This US-based  
8  
9 342 study revealed that awareness of patient safety and medical errors can be increased  
10  
11 343 and sustained through the use of an experiential curriculum, which students rated as a  
12  
13 344 valuable experience [34-35].

14 345 Insights can also be gained from the similarities observed between the four medical  
15  
16 346 schools. The descending order of positive perceptions regarding patient safety cultures  
17  
18 347 from the four universities were as follows: Mudanjiang Medical University, the  
19  
20 348 Medical College of Jiamusi University, Qiqihar Medical University, and Harbin  
21  
22 349 Medical University. There was no evidence of different reporting practices between  
23  
24 350 the four medical schools. Yet, differences in local patient safety cultures, as well as  
25  
26 351 differences in students' social and cultural backgrounds, may be significant  
27  
28 352 contributing factors [31]. However, the present study design did not enable an  
29  
30 353 exploration of these factors; we could only determine focal aspects of future teaching.  
31  
32 354 For example, Mudanjiang Medical University, the Medical College of Jiamusi  
33  
34 355 University, and Qiqihar Medical University would likely target education toward the  
35  
36 356 classification, and underlying mechanisms of medical errors. In contrast, Harbin  
37  
38 357 Medical University might target confidence in error reporting as an area for  
39  
358 improvement.

40 359 Our results are counter to those from other countries. For example, Flin et al.'s study  
41  
42 360 in the UK found that the majority of first-year students reported 'medium low' or  
43  
44 361 'average' levels of knowledge regarding errors and patient safety issues [36-40]. Our  
45  
46 362 results revealed that positive perceptions of patient safety culture tended to decrease  
47  
48 363 from younger to older cohorts. As seen in Table 3, more senior students appeared to  
49  
50 364 have less positive perceptions of 'error reporting confidence' and 'the importance of  
51  
52 365 patient safety in the curriculum'. Possible reasons include their experience of working  
53  
54 366 in strong clinical hierarchies, which is known to have a negative influence on error  
55  
56 367 reporting and disclosure of medical errors [41]. It is likely that this decrease in  
57  
58 368 medical error disclosure emerges as result of the increasing awareness and more

1  
2  
3 369 realistic self-assessment that students develop during the process of medical education  
4  
5 370 [42]. It could also be the result of inadequate training and preparation of young  
6  
7 371 doctors. Additionally, more senior students appeared to have less positive perceptions  
8  
9 372 of 'the importance of patient safety in the curriculum'. A possible reason for this is  
10  
11 373 that from the first grade to the fifth grade in the university, with the increasing number  
12  
13 374 of courses and pressure of examinations, students do not want to add new courses to  
14  
15 375 the curriculum. However, the underlying reason for this state remains to be  
16  
17 376 established.

18 377 One of the limitations of this study is a possible non-response bias. Students who  
19  
20 378 agreed to respond to the survey may have been more likely than their non-responding  
21  
22 379 peers to be interested in patient safety. This greater level of interest may have led to  
23  
24 380 inflation of attitude ratings. Another limitation is that the study made use of a  
25  
26 381 non-standardised survey instrument. Nevertheless, this is the first use of the APSQ-III  
27  
28 382 to compare patient safety cultures in different schools and cohorts within mainland  
29  
30 383 China. While the present sample was taken from only one region in China, we  
31  
32 384 covered almost all of the medical colleges within a rather large province. Furthermore,  
33  
34 385 we recruited a cohort of medical students across five years of their programs. Thus,  
35  
36 386 the present study represents an important first step toward patient safety education  
37  
38 387 research in China. We believe that our findings can help educators develop curricula  
39  
40 388 for patient safety education.

41 389 In conclusion, our study researched perceptions of patient safety culture among  
42  
43 390 medical students in China. Our results further suggest that medical students'  
44  
45 391 perceptions regarding patient safety cultures can provide a tool for guiding medical  
46  
47 392 education. Institutions should have an increased emphasis on issues related to the  
48  
49 393 reasons behind medical errors and error reporting. Shifts in patient safety cultures  
50  
51 394 should be based on situations affecting different schools and cohorts, especially  
52  
53 395 among third-year medical students. Longitudinal studies using a validated instrument  
54  
55 396 should also be conducted to better evaluate patient safety education programs and  
56  
57 397 their relative impact on local healthcare development. Further studies should explore  
58  
59 398 the culture of reporting errors and how students in nursing and healthcare profession

1  
2  
3 399 programs address these errors.  
4

5 400 **References**

- 6  
7 401 1. Kohn LT, Corrigan JM, Donaldson MS, *et al.* To err is human. Building a safer  
8  
9 402 health system. Washington DC: National Academies Press, 2000.  
10  
11 403 2. Willeumier D. Advocate health care: a systemwide approach to quality and  
12  
13 404 safety[J]. *Joint Commission Journal on Quality & Safety*, 2004, 30(10):559.  
14  
15 405 3. Stefl M E. To Err is Human: Building a Safer Health System in 1999.[J]. *Frontiers*  
16  
17 406 *of Health Services Management*, 2001, 18(1):1.  
18  
19 407 4. Liao J M, Etchegaray J M, Williams S T, *et al.* Assessing medical students'  
20  
21 408 perceptions of patient safety: the medical student safety attitudes and  
22  
23 409 professionalism survey[J]. *Academic Medicine Journal of the Association of*  
24  
25 410 *American Medical Colleges*, 2014, 89(2):343.  
26  
27 411 5. Kirch D G, Boysen P G. Changing the culture in medical education to teach patient  
28  
29 412 safety[J]. *Health Affairs*, 2010, 29(9):1600.  
30  
31 413 6. Chuang A W, Nuthalapaty F S, Casey P M, *et al.* To the point: reviews in medical  
32  
33 414 education—taking control of the hidden curriculum[J]. *American Journal of*  
34  
35 415 *Obstetrics & Gynecology*, 2010, 203(4):316.e1.  
36  
37 416 7. Institute of Medicine (US) Committee on Quality of Health Care in America.  
38  
39 417 *Crossing the Quality Chasm: A New Health System for the 21st Century*[J]. *BMJ*,  
40  
41 418 2001, 323(4): 1192.  
42  
43 419 8. Peterson C. Health professions education: a bridge to quality[J]. *Tar Heel Nurse*,  
44  
45 420 2003, 65(4):12.  
46  
47 421 9. Flanagan B, Nestel D, Joseph M. Making patient safety the focus: crisis resource  
48  
49 422 management in the undergraduate curriculum.[J]. *Medical Education*, 2004,  
50  
51 423 38(1):56–66.  
52  
53 424 10. Sandars J, Bax N, Mayer D, *et al.* Educating undergraduate medical students about  
54  
55 425 patient safety: Priority areas for curriculum development[J]. *Medical Teacher*,  
56  
57 426 2007, 29(1):60-1.  
58  
59 427 11. Nie Y, Lin L, Duan Y, *et al.* Patient safety education for undergraduate medical  
428  
60 428 students: a systematic review.[J]. *Bmc Medical Education*, 2011, 11(1):33.

- 1  
2  
3 429 12. Leung G K, Ang S B, Lau T C, et al. Patient safety culture among medical  
4 430 students in Singapore and Hong Kong[J]. Singapore Medical Journal, 2013,  
5 431 54(9):501-505.  
6  
7  
8 432 13. Mingming Zhang, Yurong Duan, Jing Li, et al. Patient safety education: One of the  
9 433 important topics for 21<sup>st</sup> medical education[J]. Chin J Evid-based  
10 434 Med. 2010.10(6):637-639.  
11  
12  
13 435 14. Walton M M, Barraclough B H, Van Staalduinen S A, et al. An Educational  
14 436 Approach to Improving Healthcare Safety and Quality[J]. Chinese Journal of  
15 437 Evidence-Based Medicine, 2009, 2(3):136-142.  
16  
17  
18 438 15. Wei-Ping H U, Yang J, Run-Long X U. Equity Analysis of the Allocation of  
19 439 General Practitioners in Mainland China[J]. Chinese General Practice, 2015.  
20  
21  
22 440 16. Hendee W R. To Err is Humans: Building a Safer Health System[J]. Journal of  
23 441 Vascular & Interventional Radiology, 2001, 12(1):P112–P113.  
24  
25  
26 442 17. WHO Patient Safety Curriculum Guide for Medical Schools. 2009. Available from:  
27 443 <http://www.who.int/patientsafety/education/curriculum/download/en/index.html>.  
28  
29  
30 444 18. Carruthers S, Lawton R, Sandars J, et al. Attitudes to patient safety amongst  
31 445 medical students and tutors: Developing a reliable and valid measure.[J]. Medical  
32 446 Teacher, 2009, 31(8):370-6.  
33  
34  
35 447 19. James B, Roberts P R, Keryn V, et al. The Safety Attitudes Questionnaire:  
36 448 psychometric properties, benchmarking data, and emerging research[J]. BMC  
37 449 Health Services Research, 2006, 6(1):44.  
38  
39  
40 450 20. Wiggleton C, Petrusa E, Loomis K, et al. Medical students' experiences of moral  
41 451 distress: development of a web-based survey[J]. Academic Medicine, 2010,  
42 452 85(1):111-117.  
43  
44  
45 453 21. Etchegaray J M, Gallagher T H, Bell S K, et al. Error disclosure: a new domain for  
46 454 safety culture assessment.[J]. Bmj Quality & Safety, 2012, 21(7):594.  
47  
48  
49 455 22. Agency for Healthcare Research and Quality. Hospital Survey on Patient Safety  
50 456 Culture. <http://www.ahrq.gov/qual/patientsafetyculture/hospsurvindex.htm>.  
51 457 Accessed October 17, 2013.  
52  
53  
54 458 23. Edition T. Principles and Practice of Structural Equation Modeling[J]. Guilford  
55  
56  
57  
58  
59  
60

- 1  
2  
3 459 Press, 2015.  
4  
5 460 24. Na Yuan, Chune Liu, Lei Yu. Study Process of Patients Involved in Treatment  
6  
7 461 Decision—Making State Quo and Influencing Factors [J]. *Medicine and Society*,  
8  
9 462 2017, 30(3):58-61.  
10  
11 463 25. FAN Xin, LIU Zhijian, SUN Rongrong, et al. Discussion on the influence of  
12  
13 464 patient safety Jculture to hospital safety management in China.[J]*Chinese*  
14  
15 465 *Hospitals*. 2017,21(7):16-17  
16  
17 466 26. Gongchun Lan, Wenguo Ying, Xiexin Qian, et al. Effective observation on  
18  
19 467 prevention for mismatched intravenous infusion by patients' participation in  
20  
21 468 double-identity confirmation.[J]. *Chinese Journal of Modern Nursing*, 2012,  
22  
23 469 18(14):1657-1659.  
24  
25 470 27. Leung G K, Patil N G. Patient safety in the undergraduate curriculum: medical  
26  
27 471 students' perception.[J]. *Hong Kong medical journal = Xianggang yi xue za zhi /*  
28  
29 472 *Hong Kong Academy of Medicine*, 2010, 16(2):101-5.  
30  
31 473 28. Singer S J, Gaba D M, Falwell A, et al. Patient Safety Climate in 92 US Hospitals:  
32  
33 474 Differences by Work Area and Discipline[J]. *Medical Care*, 2009, 47(1):23-31.  
34  
35 475 29. Karaoglu N, Seker M, Kara F, Okka B. Knowledge of new entrant medical  
36  
37 476 students about medical errors in Selcuk University: an educational perspective. *Tu*  
38  
39 477 *rkiye Klinikleri Journal of Medical S ciences* 2008; 28(5):663–71.  
40  
41 478 30. Flin R, Patey R, Jackson J, et al. Year 1 medical undergraduates' knowledge of and  
42  
43 479 attitudes to medical error.[J]. *Medical Education*, 2009, 43(12):1147–1155.  
44  
45 480 31. Wetzel A P, Dow A W, Mazmanian P E. Patient safety attitudes and behaviors of  
46  
47 481 graduating medical students.[J]. *Evaluation & the Health Professions*, 2012,  
48  
49 482 35(2):221-238.  
50  
51 483 32. Caldicott C V, Faber-Langendoen K. Deception, discrimination, and fear of  
52  
53 484 reprisal: lessons in ethics from third-year medical students[J]. *Academic Medicine*  
54  
55 485 *Journal of the Association of American Medical Colleges*, 2005, 80(9):866-73.  
56  
57 486 33. Vohra P D, Johnson J K, Daugherty C K, et al. Housestaff and medical student  
58  
59 487 attitudes toward medical errors and adverse events[J]. *Joint Commission Journal*  
60 488 *on Quality & Patient Safety*, 2007, 33(8):493.

- 1  
2  
3 489 34. Madigosky W S, Headrick L A, Nelson K, et al. Changing and sustaining medical  
4 students' knowledge, skills, and attitudes about patient safety and medical  
5 fallibility.[J]. Academic Medicine Journal of the Association of American Medical  
6 Colleges, 2006, 81(1):94-101.  
7  
8  
9 492  
10 493 35. Bowman C, Neeman N, Sehgal N L. Enculturation of unsafe attitudes and  
11 behaviors: student perceptions of safety culture.[J]. Academic Medicine Journal of  
12 the Association of American Medical Colleges, 2013, 88(6):802.  
13  
14 495  
15 496 36. Patey R, Flin R, Cuthbertson B H, et al. Patient safety: helping medical students  
16 understand error in healthcare.[J]. Quality & Safety in Health Care, 2007,  
17 16(4):256-259.  
18  
19 498  
20 499 37. Pearson P, Steven A, Howe A, et al. Learning about patient safety: organizational  
21 context and culture in the education of health care professionals[J]. J Health Serv  
22 Res Policy, 2010, 15 Suppl 1(15 Suppl 1):4-10.  
23  
24 500  
25 501  
26 502 38. Walton M M. Hierarchies: the Berlin Wall of patient safety[J]. Quality & Safety in  
27 Health Care, 2006, 15(4):229.  
28  
29 503  
30 504 39. Brainard A H, Brislen H C. Viewpoint: learning professionalism: a view from the  
31 trenches.[J]. Academic Medicine, 2007, 82(11):1010-1014.  
32  
33 505  
34 506 40. Lucey C, Souba W. Perspective: the problem with the problem of  
35 professionalism[J]. Academic Medicine Journal of the Association of American  
36 Medical Colleges, 2010, 85(6):1018.  
37  
38 508  
39 509 41. Tallentire V R, Smith S E, Skinner J, et al. Understanding the behaviour of newly  
40 qualified doctors in acute care contexts[J]. Medical Education, 2011,  
41 45(10):995-1005.  
42  
43 511  
44 512 42. Kiesewetter J, Kager M, Lux R, et al. German undergraduate medical students'  
45 attitudes and needs regarding medical errors and patient safety--a national survey  
46 in Germany.[J]. Medical Teacher, 2014, 36(6):505-10.  
47  
48 513  
49 514

50 **Acknowledgements:**

51  
52 This study was funded by the Natural Science Foundation of China (71273002,  
53 71473064); the New Century Excellent Talents of University at the Ministry of  
54 Education, China (1252-NCET02); the China Postdoctoral Science Foundation  
55  
56  
57  
58  
59  
60



519 (2015M570211, 2016T90181); and Collaborative Innovation Centre of Social Risks  
 520 Governance in Health;Project of Education Department of Heilongjiang  
 521 Province(Education Reform Project, JGXM\_HLJ\_2014087);Social science  
 522 association of Heilongjiang Province(15058).

524 **Author contributions statement:**

525 Mingli Jiao, Qunhong Wu, Ying Li and He Liu. designed the study; Jinghua Liu, Limin  
 526 Liu, Yanming Zhao, Kexin Jiang, Huiying Fang, Peihang Sun, Peng Li, Yameng Wang,  
 527 Haonan Jia and Yan Lu collected the data; He Liu, Ying Li, and Yuming Wu analysed  
 528 the data; He Liu, Ying Li, Mingli Jiao, Siqi Zhao drafted the manuscript; and Mingli  
 529 Jiao contributed to the manuscript's revision. All authors approved the final  
 530 manuscript for publication.

531 **Conflict of interest declaration:** The authors declare no conflict of interest

532 **Data sharing statement:** Data are available from the corresponding author upon  
 533 request.

534  
 535 Table 1. Participant demographic characteristics.

| subgroups | No. (%) of respondents |               |               |               |               |               |              | Overall       |
|-----------|------------------------|---------------|---------------|---------------|---------------|---------------|--------------|---------------|
|           | Gender                 |               | Level         |               |               |               |              |               |
|           | M                      | F             | First Year    | Second Year   | Third year    | Fourth year   | Fifth Year   |               |
| A*        | 322<br>(44.4)          | 404<br>(55.6) | 111<br>(15.3) | 132<br>(18.2) | 154<br>(21.2) | 245<br>(33.7) | 84<br>(11.6) | 726<br>(29.1) |
| B*        | 261<br>(41.7)          | 366<br>(58.3) | 186<br>(29.5) | 146<br>(23.1) | 117<br>(18.5) | 100<br>(15.8) | 82<br>(13)   | 631<br>(25.3) |
| C*        | 167                    | 292           | 36            | 115           | 110           | 131           | 67           | 459           |

|       |        |        |       |        |        |        |        |        |
|-------|--------|--------|-------|--------|--------|--------|--------|--------|
|       | (36.4) | (63.6) | (7.8) | (25.1) | (24)   | (28.5) | (14.6) | (18.4) |
|       | 305    | 377    | 66    | 90     | 206    | 270    | 50     | 682    |
| D*    | (45)   | (55)   | (9.7) | (13.2) | (30.2) | (39.6) | (7.3)  | (27.3) |
|       | 1055   | 1435   | 399   | 483    | 587    | 746    | 283    |        |
| Total | (42.4) | (57.4) | (16)  | (19.3) | (23.5) | (29.9) | (11.3) | 2498   |

536 \*A = Harbin Medical University.

537 \*B = Qiqihar Medical University.

538 \*C = MuDanjiang Medical University.

539 \*D = Medical College of Jiamusi University.

540

541 Table 2. Items from the APSQ-III that demonstrated significant differences between  
542 the four medical universities.

| Domain                                                                                                    | Positive responses (%) <sup>†</sup> |                 |      |      |      |
|-----------------------------------------------------------------------------------------------------------|-------------------------------------|-----------------|------|------|------|
|                                                                                                           | Over all                            | Between schools |      |      |      |
|                                                                                                           |                                     | A*              | B*   | C*   | D*   |
| <b>Patient safety training received</b>                                                                   | 84.9                                | 57.3            | 90   | 99.4 | 98.5 |
| 1. My training is preparing me to understand the causes of medical errors.                                | 84.8                                | 56.6            | 89.7 | 99   | 99   |
| 2. I have a good understanding of patient safety issues as a result of my undergraduate medical training. | 85.2                                | 58.4            | 90.2 | 99.8 | 97   |
| 3. My training is preparing me to prevent medical errors.                                                 | 84.7                                | 56.8            | 90.1 | 99.3 | 99.4 |
| <b>error reporting confidence</b>                                                                         | 74.9                                | 53.1            | 75.8 | 85.6 | 88.1 |

|                                                                                                                                                |      |     |     |     |      |
|------------------------------------------------------------------------------------------------------------------------------------------------|------|-----|-----|-----|------|
| 4. I would feel comfortable reporting any errors I had made, no matter how serious the outcome had been for the patient.                       | 71.6 | 52. | 68. | 80. | 85.7 |
|                                                                                                                                                |      | 9   | 5   | 5   |      |
| 5. I would feel comfortable reporting any errors other people had made, no matter how serious the outcome had been for the patient.            | 76.7 | 53. | 79. | 88. | 89.5 |
|                                                                                                                                                |      | 4   | 8   | 1   |      |
| 6. I am confident I can talk openly to my supervisor about an error I had made, even if it resulted in potential or actual harm to my patient. | 76.5 | 53. | 79  | 88. | 89.2 |
|                                                                                                                                                |      | 1   |     | 1   |      |
| <b>working hours as an error cause</b>                                                                                                         | 83.4 | 56. | 88. | 98  | 98.7 |
|                                                                                                                                                |      | 2   | 2   |     |      |
| 7. Shorter shifts for doctors will reduce medical errors.                                                                                      | 81.7 | 53. | 85. | 97. | 97.3 |
|                                                                                                                                                |      | 9   | 9   | 1   |      |
| 8. By not taking regular breaks during shifts, doctors are at an increased risk of making errors.                                              | 84.7 | 57. | 89. | 98. | 99.5 |
|                                                                                                                                                |      | 8   | 8   | 9   |      |
| 9. The number of hours doctors work increases the likelihood of making medical errors.                                                         | 83.8 | 56. | 89  | 97. | 99.4 |
|                                                                                                                                                |      | 8   |     | 9   |      |
| <b>error inevitability</b>                                                                                                                     | 74.9 | 55. | 80. | 87. | 82.2 |
|                                                                                                                                                |      | 2   | 9   | 1   |      |
| 10. Even the most experienced and competent doctors make errors.                                                                               | 84.3 | 56. | 89. | 99. | 98.7 |
|                                                                                                                                                |      | 7   | 4   | 8   |      |
| 11. A true professional does not make mistakes or errors.                                                                                      | 68.9 | 53  | 79. | 86. | 64.8 |
|                                                                                                                                                |      |     | 3   | 1   |      |
| 12. Human error is inevitable.                                                                                                                 | 71.6 | 56  | 73. | 75. | 83.2 |
|                                                                                                                                                |      |     | 9   | 4   |      |
| <b>professional incompetence as an error cause</b>                                                                                             | 58.4 | 53. | 59. | 61  | 60   |
|                                                                                                                                                |      | 25  | 6   |     |      |
| 13. Most medical errors result from careless nurses <sup>†</sup>                                                                               | 68.1 | 56. | 79  | 79. | 62.1 |
|                                                                                                                                                |      | 8   |     | 3   |      |

|                                                                                                                     |      |     |     |     |      |
|---------------------------------------------------------------------------------------------------------------------|------|-----|-----|-----|------|
| 14. If people paid more attention at work, medical errors would be avoided <sup>†</sup>                             | 67.2 | 53. | 62. | 72. | 80.1 |
|                                                                                                                     |      | 2   | 5   | 8   |      |
| 15. Most medical errors result from careless doctors <sup>†</sup>                                                   | 65.8 | 55. | 74. | 77. | 61.4 |
|                                                                                                                     |      | 1   | 2   | 1   |      |
| 16. Medical errors are a sign of incompetence <sup>†</sup>                                                          | 32.5 | 47. | 22. | 14. | 36.5 |
|                                                                                                                     |      | 9   | 7   | 7   |      |
| <b>disclosure responsibility</b>                                                                                    | 69.4 | 55. | 72. | 78. | 74.8 |
|                                                                                                                     |      | 1   | 6   | 4   |      |
| 17. It is not necessary to report errors which do not result in adverse outcomes for the patient <sup>†</sup>       | 60.8 | 57. | 70. | 69. | 48.8 |
|                                                                                                                     |      | 6   | 7   | 8   |      |
| 18. Doctors have a responsibility to disclose errors to patients only if the errors result in patient harm.         | 80.8 | 55  | 85. | 93. | 94.5 |
|                                                                                                                     |      |     | 2   | 8   |      |
| 19. All medical errors should be reported.                                                                          | 66.7 | 52. | 61. | 71. | 81   |
|                                                                                                                     |      | 6   | 9   | 6   |      |
| <b>team functioning</b>                                                                                             | 76.9 | 55. | 77. | 87. | 91.8 |
|                                                                                                                     |      | 7   | 5   | 6   |      |
| 20. Better multidisciplinary teamwork will reduce medical errors.                                                   | 69.2 | 54. | 64. | 75. | 84.5 |
|                                                                                                                     |      | 9   | 5   | 4   |      |
| 21. Teaching students teamwork skills will reduce medical errors.                                                   | 84.7 | 56. | 90. | 99. | 99.1 |
|                                                                                                                     |      | 6   | 5   | 8   |      |
| <b>patient involvement in reducing errors</b>                                                                       | 84.7 | 56. | 90. | 99. | 98.7 |
|                                                                                                                     |      | 7   | 2   | 4   |      |
| 22. Patients have an important role in preventing medical errors.                                                   | 85.1 | 56. | 90. | 99. | 98.6 |
|                                                                                                                     |      | 1   | 5   | 5   |      |
| 23. Encouraging patients to be more involved in their care can help to reduce the risk of medical errors occurring. | 84.5 | 57. | 90  | 99. | 98.8 |
|                                                                                                                     |      | 3   |     | 3   |      |
| <b>importance of patient safety in the curriculum</b>                                                               | 71.6 | 56. | 78. | 82. | 74.4 |
|                                                                                                                     |      | 4   | 5   | 4   |      |

|                                                                                                                                          |      |      |      |      |      |
|------------------------------------------------------------------------------------------------------------------------------------------|------|------|------|------|------|
| 24. Teaching students about patient safety should be an important priority in medical students' training.                                | 84.1 | 55.9 | 89.5 | 99.1 | 98.6 |
| 25. Patient safety issues cannot be taught; they can only be learned through clinical experience, which is gained when one is qualified. | 46.6 | 55.8 | 55.4 | 50.4 | 25.3 |
| 26. Learning about patient safety issues before I qualify will enable me to become a more effective doctor.                              | 85.5 | 57.7 | 90.7 | 99.3 | 99.4 |

543 \*A = Harbin Medical University.

544 \*B = Qiqihar Medical University.

545 \*C = MuDanJiang Medical University.

546 \*D = Medical College of Jiamusi University.

547 ‡ Positive responses are those with 'agree' or 'strongly agree'. The denominator for  
548 each question may vary because not every student responded to every question in the  
549 survey.

550 † Negatively worded item, where the percent positive response is based on those who  
551 responded, 'strongly disagree' or 'disagree.'

552

553 Table 3. Items on the APSQ-III that demonstrated significant differences between the  
554 five cohorts.

| S | Positive responses (%) <sup>†</sup> |          |          |       |          |       |      |           |          |      |
|---|-------------------------------------|----------|----------|-------|----------|-------|------|-----------|----------|------|
|   | h                                   | Patient  | Error    | Work  | Professi | Disc  | Tea  | Patient   | Importa  |      |
| o | Gra                                 | safety   | reportin | ing   | onal     | losu  | m    | involve   | nance of |      |
| o | des                                 | training | g        | hours | incompe  | re    | fun  | ment in   | patient  |      |
| l |                                     | received | confide  | as an | tence as | resp  | ctio | reducin   | safety   |      |
| s |                                     | *        | nance*   | error | ty*      | onsi  | nin  | g errors* | in the   |      |
|   |                                     |          |          | cause | an error | bilit | g*   |           | curricul |      |
|   |                                     |          |          | *     | cause    | y     |      |           | um*      |      |
| A | first                               | 78.6     | 73.4     | 79.7  | 71.9     | 56.6  | 66.4 | 73.       | 80.8     | 50.7 |

|   |        |      |      |      |      |      |      |      |      |      |
|---|--------|------|------|------|------|------|------|------|------|------|
|   |        |      |      |      |      |      | 9    |      |      |      |
|   | second | 74.3 | 62.9 | 74.4 | 71.4 | 56   | 66.6 | 64   | 71.9 | 49.8 |
|   | third  | 57.1 | 52.9 | 56.2 | 52.8 | 51.9 | 51.4 | 57.5 | 55.1 | 41.5 |
|   | fourth | 43.1 | 40   | 40.5 | 45.4 | 51.1 | 48.7 | 42.7 | 42.8 | 37.6 |
|   | fifth  | 45.2 | 46.4 | 42.6 | 41.1 | 51.8 | 46.6 | 51.2 | 42.7 | 33.7 |
|   | first  | 99.4 | 84.7 | 95.8 | 86   | 61.5 | 78.2 | 84.1 | 98.9 | 62.6 |
|   | second | 97.2 | 86.8 | 95   | 91.1 | 66.3 | 78.5 | 87   | 99.1 | 59.8 |
| B | third  | 98   | 72.7 | 95.9 | 83.8 | 59.2 | 63.3 | 81.3 | 100  | 63.5 |
|   | fourth | 98.9 | 86.5 | 97.3 | 84.4 | 60.9 | 77.5 | 78.8 | 97.3 | 63.5 |
|   | fifth  | 61.4 | 51.9 | 61.2 | 61.6 | 51.5 | 57.4 | 56.1 | 58.7 | 47.2 |
|   | first  | 99.1 | 90.3 | 96.1 | 91.9 | 62   | 84.1 | 86.4 | 98.2 | 63.5 |
|   | second | 99.6 | 90.3 | 98.3 | 84.2 | 63.6 | 81.2 | 81.1 | 99.5 | 63.2 |
| C | third  | 100  | 83.4 | 97.9 | 87.1 | 60.7 | 78.2 | 91   | 100  | 59.3 |
|   | fourth | 97   | 77.9 | 96.9 | 86.9 | 60   | 75.2 | 87.2 | 95.7 | 66.5 |
|   | fifth  | 99.7 | 79.9 | 99.4 | 85.2 | 58.5 | 70.9 | 92.6 | 100  | 58.2 |

|   |        |      |      |      |      |      |      |     |      |      |
|---|--------|------|------|------|------|------|------|-----|------|------|
|   |        |      |      |      |      |      |      | 90. |      |      |
|   | first  | 99.1 | 87.1 | 99.2 | 86   | 63.3 | 72.7 | 2   | 97.1 | 56.7 |
|   | second | 98.5 | 88.7 | 99.2 | 83.2 | 61.3 | 77.5 | 91  | 98.2 | 54.6 |
| D | third  | 97.1 | 87.2 | 97.2 | 82.9 | 59.9 | 74.8 | 89. | 99.2 | 57.8 |
|   | fourth | 100  | 96.1 | 100  | 74.2 | 52.3 | 67   | 97. | 100  | 52.4 |
|   | fifth  | 100  | 78   | 100  | 79.3 | 41   | 74.9 | 100 | 100  | 65.1 |
| O | first  | 93.5 | 82.5 | 91.7 | 82.7 | 60.4 | 74.4 | 82. | 93.5 | 58.1 |
|   | second | 91.9 | 81.6 | 90.9 | 82.6 | 61.9 | 75.8 | 79. | 91.5 | 56.9 |
| r | third  | 87.4 | 74.6 | 86.4 | 76   | 57.8 | 67   | 79. | 87.9 | 54.9 |
| a | fourth | 80.7 | 73.2 | 79.5 | 68.2 | 54.4 | 63.9 | 75. | 80   | 51.5 |
| l | fifth  | 72.4 | 61.8 | 71.7 | 64.7 | 51.6 | 60.4 | 71  | 71   | 49.1 |

555 \*P<0.05

556 \*A = Harbin Medical University.

557 \*B = Qiqihar Medical University.

558 \*C = MuDanJiang Medical University.

559 \*D = Medical College of Jiamusi University.

560 † Positive responses are those who responded, 'agree' or 'strongly agree.' The  
 561 denominator for each question may vary because not every student responded to every  
 562 question in the survey.

STROBE Statement—Checklist of items that should be included in reports of *cross-sectional studies*

|                          | Item No | Recommendation                                                                                                                                                                                    | Reported on page # |
|--------------------------|---------|---------------------------------------------------------------------------------------------------------------------------------------------------------------------------------------------------|--------------------|
| Title and abstract       | 1       | (a) Indicate the study's design with a commonly used term in the title or the abstract                                                                                                            | 1                  |
|                          |         | (b) Provide in the abstract an informative and balanced summary of what was done and what was found                                                                                               | 2                  |
| <b>Introduction</b>      |         |                                                                                                                                                                                                   |                    |
| Background/rationale     | 2       | Explain the scientific background and rationale for the investigation being reported                                                                                                              | 3-6                |
| Objectives               | 3       | State specific objectives, including any prespecified hypotheses                                                                                                                                  | 6                  |
| <b>Methods</b>           |         |                                                                                                                                                                                                   |                    |
| Study design             | 4       | Present key elements of study design early in the paper                                                                                                                                           | 6                  |
| Setting                  | 5       | Describe the setting, locations, and relevant dates, including periods of recruitment, exposure, follow-up, and data collection                                                                   | 6                  |
| Participants             | 6       | (a) Give the eligibility criteria, and the sources and methods of selection of participants                                                                                                       | 6                  |
| Variables                | 7       | Clearly define all outcomes, exposures, predictors, potential confounders, and effect modifiers. Give diagnostic criteria, if applicable                                                          | 6                  |
| Data sources/measurement | 8*      | For each variable of interest, give sources of data and details of methods of assessment (measurement). Describe comparability of assessment methods if there is more than one group              | 6-7                |
| Bias                     | 9       | Describe any efforts to address potential sources of bias                                                                                                                                         | 6                  |
| Study size               | 10      | Explain how the study size was arrived at                                                                                                                                                         | 6                  |
| Quantitative variables   | 11      | Explain how quantitative variables were handled in the analyses. If applicable, describe which groupings were chosen and why                                                                      | 6-7                |
| Statistical methods      | 12      | (a) Describe all statistical methods, including those used to control for confounding                                                                                                             | 7                  |
|                          |         | (b) Describe any methods used to examine subgroups and interactions                                                                                                                               | 6                  |
|                          |         | (c) Explain how missing data were addressed                                                                                                                                                       | 6                  |
|                          |         | (d) If applicable, describe analytical methods taking account of sampling strategy                                                                                                                | 6                  |
|                          |         | (e) Describe any sensitivity analyses                                                                                                                                                             |                    |
| <b>Results</b>           |         |                                                                                                                                                                                                   |                    |
| Participants             | 13*     | (a) Report numbers of individuals at each stage of study—eg numbers potentially eligible, examined for eligibility, confirmed eligible, included in the study, completing follow-up, and analysed | 7-8, 18-19         |
|                          |         | (b) Give reasons for non-participation at each stage                                                                                                                                              |                    |
|                          |         | (c) Consider use of a flow diagram                                                                                                                                                                |                    |
| Descriptive data         | 14*     | (a) Give characteristics of study participants (eg demographic, clinical, social) and information on exposures and potential confounders                                                          | 7                  |
|                          |         | (b) Indicate number of participants with missing data for each variable of interest                                                                                                               | 6, 18-19           |
| Outcome data             | 15*     | Report numbers of outcome events or summary measures                                                                                                                                              | 6-9                |
| Main results             | 16      | (a) Give unadjusted estimates and, if applicable, confounder-adjusted                                                                                                                             |                    |



|                          |    |                                                                                                                                                                            |             |
|--------------------------|----|----------------------------------------------------------------------------------------------------------------------------------------------------------------------------|-------------|
|                          |    | estimates and their precision (eg, 95% confidence interval). Make clear which confounders were adjusted for and why they were included                                     |             |
|                          |    | (b) Report category boundaries when continuous variables were categorized                                                                                                  |             |
|                          |    | (c) If relevant, consider translating estimates of relative risk into absolute risk for a meaningful time period                                                           |             |
| Other analyses           | 17 | Report other analyses done—eg analyses of subgroups and interactions, and sensitivity analyses                                                                             |             |
| <b>Discussion</b>        |    |                                                                                                                                                                            |             |
| Key results              | 18 | Summarise key results with reference to study objectives                                                                                                                   | 9-12, 18-24 |
| Limitations              | 19 | Discuss limitations of the study, taking into account sources of potential bias or imprecision. Discuss both direction and magnitude of any potential bias                 | 13          |
| Interpretation           | 20 | Give a cautious overall interpretation of results considering objectives, limitations, multiplicity of analyses, results from similar studies, and other relevant evidence | 13          |
| Generalisability         | 21 | Discuss the generalisability (external validity) of the study results                                                                                                      | 13          |
| <b>Other information</b> |    |                                                                                                                                                                            |             |
| Funding                  | 22 | Give the source of funding and the role of the funders for the present study and, if applicable, for the original study on which the present article is based              | 17-18       |

\*Give information separately for exposed and unexposed groups.

**Note:** An Explanation and Elaboration article discusses each checklist item and gives methodological background and published examples of transparent reporting. The STROBE checklist is best used in conjunction with this article (freely available on the Web sites of PLoS Medicine at <http://www.plosmedicine.org/>, Annals of Internal Medicine at <http://www.annals.org/>, and Epidemiology at <http://www.epidem.com/>). Information on the STROBE Initiative is available at [www.strobe-statement.org](http://www.strobe-statement.org).

# BMJ Open

## Perceptions of patient safety culture among medical students: A cross-sectional investigation in Heilongjiang Province, China

|                                 |                                                                                                                                                                                                                                                                                                                                                                                                                                                                                                                                                                                                                                                                                                                                                                                                                                                                                                                                                                                                                                                                                                                                                                                                                                                                                                                                                                                                                                                                                                                                                                                                                                                                                        |
|---------------------------------|----------------------------------------------------------------------------------------------------------------------------------------------------------------------------------------------------------------------------------------------------------------------------------------------------------------------------------------------------------------------------------------------------------------------------------------------------------------------------------------------------------------------------------------------------------------------------------------------------------------------------------------------------------------------------------------------------------------------------------------------------------------------------------------------------------------------------------------------------------------------------------------------------------------------------------------------------------------------------------------------------------------------------------------------------------------------------------------------------------------------------------------------------------------------------------------------------------------------------------------------------------------------------------------------------------------------------------------------------------------------------------------------------------------------------------------------------------------------------------------------------------------------------------------------------------------------------------------------------------------------------------------------------------------------------------------|
| Journal:                        | <i>BMJ Open</i>                                                                                                                                                                                                                                                                                                                                                                                                                                                                                                                                                                                                                                                                                                                                                                                                                                                                                                                                                                                                                                                                                                                                                                                                                                                                                                                                                                                                                                                                                                                                                                                                                                                                        |
| Manuscript ID                   | bmjopen-2017-020200.R2                                                                                                                                                                                                                                                                                                                                                                                                                                                                                                                                                                                                                                                                                                                                                                                                                                                                                                                                                                                                                                                                                                                                                                                                                                                                                                                                                                                                                                                                                                                                                                                                                                                                 |
| Article Type:                   | Research                                                                                                                                                                                                                                                                                                                                                                                                                                                                                                                                                                                                                                                                                                                                                                                                                                                                                                                                                                                                                                                                                                                                                                                                                                                                                                                                                                                                                                                                                                                                                                                                                                                                               |
| Date Submitted by the Author:   | 03-Mar-2018                                                                                                                                                                                                                                                                                                                                                                                                                                                                                                                                                                                                                                                                                                                                                                                                                                                                                                                                                                                                                                                                                                                                                                                                                                                                                                                                                                                                                                                                                                                                                                                                                                                                            |
| Complete List of Authors:       | <p>Liu, He; Hebei Medical University, Office of Academic Affairs</p> <p>Li, Ying; Harbin Medical University, Department of Health Policy and Hospital Management</p> <p>Zhao, Siqi; Hebei Medical University, Department of Nursing Psychology and Humanities</p> <p>Jiao, Mingli; Harbin Medical University, Health policy ; Chinese Academy of Social Science, Institute of Quantitative &amp; Technical Economics</p> <p>Lu, Yan; Jiamusi University, School of Public Health</p> <p>Liu, Jinghua; QiQihar Medical University</p> <p>Jiang, Kexin; Harbin Medical University, Department of Health Policy and Hospital Management, School of Public Health</p> <p>Fang, Huiying; Harbin Medical University, Department of Health, Policy and Hospital Management, School of Public Health</p> <p>Sun, Peihang; Harbin Medical University, Department of Health, Policy and Hospital Management, School of Public Health</p> <p>Li, Peng; Harbin Medical University, Department of Health Policy and Hospital Management, School of Public Health</p> <p>Wang, Yameng; Harbin Medical University, Department of Health Policy and Hospital Management</p> <p>Jia, Haonan; Harbin Medical University, Department of Health Policy and Hospital Management, School of Public Health</p> <p>Wu, Yuming; Hebei Medical University, Department of physiology, School of basic medicine</p> <p>Liu, Limin; The 2nd Affiliated Hospital of Harbin Medical University, Medical record room</p> <p>Zhao, Yanming; The 2nd Affiliated Hospital of Harbin Medical University, CT room</p> <p>Wu, Qunhong; Harbin Medical University, Department of Social Medicine, School of Public Health</p> |
| <b>Primary Subject Heading</b>: | Public health                                                                                                                                                                                                                                                                                                                                                                                                                                                                                                                                                                                                                                                                                                                                                                                                                                                                                                                                                                                                                                                                                                                                                                                                                                                                                                                                                                                                                                                                                                                                                                                                                                                                          |
| Secondary Subject Heading:      | Health policy, Medical education and training                                                                                                                                                                                                                                                                                                                                                                                                                                                                                                                                                                                                                                                                                                                                                                                                                                                                                                                                                                                                                                                                                                                                                                                                                                                                                                                                                                                                                                                                                                                                                                                                                                          |
| Keywords:                       | medical education, patient safety, medicine students                                                                                                                                                                                                                                                                                                                                                                                                                                                                                                                                                                                                                                                                                                                                                                                                                                                                                                                                                                                                                                                                                                                                                                                                                                                                                                                                                                                                                                                                                                                                                                                                                                   |
|                                 |                                                                                                                                                                                                                                                                                                                                                                                                                                                                                                                                                                                                                                                                                                                                                                                                                                                                                                                                                                                                                                                                                                                                                                                                                                                                                                                                                                                                                                                                                                                                                                                                                                                                                        |

1  
2  
3  
4  
5  
6  
7  
8  
9  
10  
11  
12  
13  
14  
15  
16  
17  
18  
19  
20  
21  
22  
23  
24  
25  
26  
27  
28  
29  
30  
31  
32  
33  
34  
35  
36  
37  
38  
39  
40  
41  
42  
43  
44  
45  
46  
47  
48  
49  
50  
51  
52  
53  
54  
55  
56  
57  
58  
59  
60

SCHOLARONE™  
Manuscripts

For peer review only

1 **Perceptions of patient safety culture among medical students: A cross-sectional**  
 2 **investigation in Heilongjiang Province, China**

3 **He Liu<sup>1†</sup>, Ying Li<sup>2†</sup>, Siqi Zhao<sup>3</sup>, Mingli Jiao<sup>2,4\*</sup>, Yan Lu<sup>5</sup>, Jinghua Liu<sup>6</sup>, Kexin Jiang<sup>2</sup>, Huiying**  
 4 **Fang<sup>2</sup>, Peihang Sun<sup>2</sup>, Peng Li<sup>2</sup>, Yameng Wang<sup>2</sup>, Haonan Jia<sup>2</sup>, Yuming Wu<sup>7\*</sup>, Limin Liu<sup>8</sup>,**  
 5 **Yanming Zhao<sup>9</sup>, Qunhong Wu<sup>10\*</sup>**

6 1 Office of Academic Affairs, Hebei Medical University, 361 Zhongshan East Road, Chang'an Di  
 7 strict, Shijiazhuang 050017, China; E-Mail: 771773207@qq.com (H.L.)

8 2 Department of Health Policy and Hospital Management, School of Public Health, Harbin  
 9 Medical University, 157 Baojian Road, Nangang District, Harbin 150081, China;  
 10 E-Mails: 1690342267@qq.com (Y.L.); 576732775@qq.com (S.Z.);  
 11 jiangkexin1994@163.com (K.J.); 565453428@qq.com (H.F.); 745450570@qq.com (P.S.);  
 12 18845146293@163.com (P.L.); 984453904@qq.com (Y.W.); 495150755@163.com (H.J.)

13 3 Department of Psychology and Humanities Nursing, Hebei Medical University, Donggang  
 14 Road 48, Yuhua District, Shijiazhuang 050017, China; E-Mail:  
 15 siqizhao1992@foxmail.com (S.Z.)

16 4 Institute of Quantitative & Technical Economics, Chinese Academy of Social Science,  
 17 5 Jian guo men nei Road, Dongcheng District, Beijing 100000, China; E-Mail: minglijiao@  
 18 126.com (M.J.)

19 5 School of Public Health, Jiamusi University, Jiamusi 154007, China; E-Mail:  
 20 yanlulyan@163.com (Y.L.)

21 6 School of Public Health, QiQihar Medical University, QiQihar 161006, China; E-Mail:  
 22 liujinghuaahl@126.com (J.L.)

23 7 Department of physiology, School of basic medicine, Hebei Medical University, 361 Zhongshan  
 24 Road, Changan District, Shijiazhuang 050017, China; E-Mail: wuyanmingymw@126.com  
 25 (Y.W.)

26 8 Medical record room, The 2nd Affiliated Hospital of Harbin Medical University,  
 27 Harbin 150081, China; E-Mail: liuliminlml@126.com (L.L.)

28 9 CT room, The 2nd Affiliated Hospital of Harbin Medical University, Harbin 150081,  
 29 China; E-Mail: yanmingzhaozym@163.com (Y.Z.)

30 10 Department of Social Medicine, School of Public Health, Harbin Medical University, 157  
 31 Baojian Road, Nangang District, Harbin 150081, China;  
 32 E-Mails: wuqunhong12345@163.com (Q.W.)

34 †These authors contributed equally to this work.

35 \*Correspondence : minglijiao@126.com; wuqunhong12345@163.com; and  
 36 wuyanmingymw@126.com

1  
2  
3 39 **Abstract**  
4

5 40 **Objectives:** Medical school education plays an important role in promoting patient  
6  
7 41 safety. The present study aimed to assess medical students' perceptions of patient  
8  
9 42 safety culture, and to identify the educational needs of these students and provide  
10  
11 43 evidence on the most important content for a curriculum relating to patient safety.

12 44 **Method:** A cross-sectional study was conducted within each of the four medical  
13  
14 45 universities in Heilongjiang province. First through fifth-year medical students  
15  
16 46 completed an anonymous questionnaire—the Attitudes toward Patient Safety  
17  
18 47 Questionnaire III (APSQ-III). Differences in responses across the four universities  
19  
20 48 and cohorts were analysed.

21 49 **Results:** Overall perceptions of patient safety cultures across the four medical  
22  
23 50 universities were positive. The highest positive response rate was for, 'I have a good  
24  
25 51 understanding of patient safety issues because of my undergraduate medical training'  
26  
27 52 (range: 58.4%–99.8%), while the lowest positive response rate was for, 'medical  
28  
29 53 errors are a sign of incompetence' (14.7%–47.9%).

30  
31 54 Younger cohorts had a better awareness of working hours and teamwork. However,  
32  
33 55 fourth and fifth-year students had a better awareness of error inevitability. The lowest  
34  
35 56 positive scores between cohorts included items related to 'professional incompetence  
36  
37 57 as an error cause' and 'disclosure responsibility'.

38 58 **Conclusions:** Students' self-assessment of patient safety culture were positive,  
39  
40 59 although none of students had received any formal curriculum content on patient  
41  
42 60 safety. Policy makers should place a greater focus on varied educational needs across  
43  
44 61 schools and cohorts to establish proper curricula.

45 62 **Keywords:** medical education, patient safety, medicine students  
46  
47 63

48  
49 64 **Strengths and limitations of this study**

50  
51 65 Strengths:

- 52  
53 66 ● This is the first use of the APSQ-III to compare patient safety in different schools  
54  
55 67 and cohorts within a developing country (China)  
56  
57 68 ● We covered almost all of the medical colleges within a rather large province  
58  
59  
60

- 1  
2  
3 69 ● This study provides the necessary evidence for educators to design future  
4 interventions and create a sense of focus on patient safety in medical education  
5  
6

7 Limitations:

- 8  
9 72 ● APSQ-III is a new instrument, the reliability and validity of which have not yet  
10 been retested  
11  
12 74 ● Our study is limited by the potential for non-response bias. Students who  
13 responded to the survey may have been more likely than their peers to be  
14 interested in patient safety, which may have led to inflation of the attitude ratings  
15  
16  
17

## 18 1. Introduction

19 Hippocrates, who is considered the ‘father of medicine’, proposed the ‘Hippocratic  
20 Oath’. Medical students take this oath worldwide to promote a rigorous and  
21 enthusiastic attitude toward medical education. Hence, the maintenance and promotion  
22 of patient safety is of utmost importance.  
23

24 However, as noted a decade ago by the Institute of Medicine (IOM), accountability  
25 for patient safety requires a multi-layered approach—one that addresses system errors  
26 as well as human ones—to help prevent medical errors [1-3]. Advancements in patient  
27 safety require a fundamental culture change in healthcare. Reducing harm through an  
28 improved safety culture is a global priority [2]. Policy makers, payers, and groups  
29 (such as the Agency for Healthcare, Research, and Quality (AHRQ), National Patient  
30 Safety Agency, and World Health Organization) have developed numerous safety  
31 initiatives at the national and institutional level [4]. However, most measures have  
32 targeted doctors, managers, and other health care professionals. Less attention has  
33 been paid to medical students, the next generation of medical scientists [5].  
34

35 The clinical practice stage is key for acquiring practical skills among medical students,  
36 at which point the student begins to shift roles from ‘student’ to ‘doctor’. To protect  
37 the rights of teachers and medical students and the interests of patients, and to ensure  
38 the quality of medical education, the National Health and Family Planning  
39 Commission and the Ministry of Education of the People’s Republic of China develop  
40 clear regulatory requirements for medical students and medical graduates in clinical  
41 trial practice. While clinical teachers bear legal responsibility for medical disputes due  
42  
43  
44  
45  
46  
47  
48  
49  
50  
51  
52  
53  
54  
55  
56  
57  
58  
59  
60

1  
2  
3 99 to incorrect guidance, when medical students conduct clinical treatment activities  
4  
5 100 without the permission of the clinical teacher, individuals bear the corresponding legal  
6  
7 101 responsibility.

8  
9 102 There is now a growing awareness that students are influenced not only by what is  
10  
11 103 taught in the formal curriculum, but also by unspoken, powerful messages conveyed  
12  
13 104 through interactions with superiors and educators during students' clinical practice  
14  
15 105 [6-8]. For example, although students are taught to wash their hands before interacting  
16  
17 106 with patients, it is not until they witness doctors engaging in this behaviour within a  
18  
19 107 clinical setting that this requirement is truly understood.

20  
21 108 One of the medical teachers from Harbin Medical University said that the main  
22  
23 109 purpose of clinical practice is to form proper 'clinical thinking'. This lays a solid  
24  
25 110 foundation for the student's future work. My teachers not only provided us with  
26  
27 111 knowledge but exemplars of proper work ethic and style. Thus, I am attempting to  
28  
29 112 pass on these characteristics to students.

30  
31 113 Medical school curricula need to be strengthened to comprehensively advocate safety  
32  
33 114 training. Work within this 'hidden curriculum' can deal with students who may engage  
34  
35 115 in or be taught practices that oppose content from the formal curriculum, professional  
36  
37 116 values, and even safe patient care. During pressure situations, such as those  
38  
39 117 experienced during emergencies, doctors can be challenged with making proper  
40  
41 118 decisions in a timely fashion, which could be an enormous threat to patient safety [9].

42  
43 119 Therefore, the nation's medical schools, teaching hospitals, and health systems  
44  
45 120 recognize that achieving greater patient safety requires more than a brief course in an  
46  
47 121 already crowded medical school curriculum. There is a need for a fundamental culture  
48  
49 122 change across all phases of medical education. [10].

50  
51 123 Some scholars have addressed issues related to improved patient safety. For instance,  
52  
53 124 we previously observed that open communication, non-punitive responses to errors,  
54  
55 125 and professionalism are key areas of concern regarding medical students' perceptions  
56  
57 126 of the patient safety culture [11]. Leung investigated perspectives of the patient safety  
58  
59 127 culture among medical students in Hong Kong and Singapore and compared students'  
60  
128 educational needs. However, the study only surveyed two cohorts of second-year

1  
2  
3 129 medical students, and it did not consider students in different years of medical school.  
4  
5 130 [12].

6  
7 131 Patient safety education in areas with low medical standards and high medical risks,  
8  
9 132 as is the case in developing countries like China, is in its infancy [13]. While a few  
10  
11 133 reports have explored safety education content and teaching methods in China [14],  
12  
13 134 patient safety education has not been fully implemented within curricula and clinical  
14  
15 135 practice. Ensuring the safety of patients is the primary task of medical staff. Medical  
16  
17 136 students should have the capacity to ensure the safety of patients in the process of  
18  
19 137 pursuing a medical career in the future. Patient safety education for medical students  
20  
21 138 is to curb or reduce medical errors from the source and to promote patient safety. [13].  
22  
23 139 The first important question, then, is to determine what knowledge medical students  
24  
25 140 are specifically lacking. Additionally, information is needed regarding cognitive  
26  
27 141 components of students' perceptions of patient safety culture. Finally, we need to  
28  
29 142 assess students' explicit educational needs and what should be focused upon within a  
30  
31 143 patient safety curriculum. Understanding these various components are the first steps  
32  
33 144 in providing patient safety education.

34  
35 145 Low levels of hospital management, limited personal technology, and other issues are  
36  
37 146 prevalent in developing countries; therefore, patient safety problems tend to be more  
38  
39 147 serious than what is observed in developed countries [15]. Addressing safety  
40  
41 148 education for medical students in developing countries is particularly urgent. The  
42  
43 149 WHO Director General, Margaret Chan, highlighted patient safety as a key task going  
44  
45 150 forward [16]. This led to the publication of a Chinese version of the 'WHO Patient  
46  
47 151 Safety Course Guide' in July 2012 in support of a resolution from the Ministry of  
48  
49 152 Health (National Health and Family Planning Commission of the People's Republic  
50  
51 153 of China).

52  
53 154 Heilongjiang province, as the healthcare centre of Northeast China, has the largest  
54  
55 155 area and availability of health resources, and it has more than 30 million people [17],  
56  
57 156 while Harbin Medical University has the best educational reputation with the most  
58  
59 157 stringent entrance requirements. Qiqihar Medical University, Mudanjiang Medical  
60  
158 University, and the Medical College of Jiamusi University are also prominent (along



1  
2  
3 159 with their three-level hospitals) in Heilongjiang province. The four medical schools  
4  
5 160 provide medical and health service personnel training for the province. The medical  
6  
7 161 students as the future medical workers trained by the medical schools in the region  
8  
9 162 need to bear some pressure and mission. However, there are few studies on patient  
10  
11 163 safety culture of medical students. Understanding the baseline patient safety culture,  
12  
13 164 and identifying important and urgent educational needs, is critical for the effective  
14  
15 165 design and successful implementation of education programs at Heilongjiang's  
16  
17 166 medical institutions. Consequently, we evaluated patient safety culture from students'  
18  
19 167 perspectives. This was done to explore factors critical to transforming patient safety  
20  
21 168 perspectives and address students' educational needs.

## 21 169 **2. Methods**

### 22 170 **2.1 Sampling and Data collection**

23  
24  
25 171 In 2014, a cross-sectional survey was conducted with four medical schools in  
26  
27 172 Heilongjiang province. Cooperation was obtained from managers in the student  
28  
29 173 offices. Some schools offered courses in doctor-patient relations and evidence-based  
30  
31 174 medicine, but there was no dedicated and systematic patient safety course. None of  
32  
33 175 the students had received any prior formal teaching on patient safety, enabling a  
34  
35 176 baseline assessment of safety culture among these students. We used systematic  
36  
37 177 random sampling to select 800 clinical medical students from a roster of all medical  
38  
39 178 undergraduates at each school. We provided these students with detailed explanations  
40  
41 179 of the objective of this investigation; some students expressed interest in participating  
42  
43 180 in the survey, while others declined to participate. Students who were willing to  
44  
45 181 participate in the investigation were given two days to complete the questionnaire  
46  
47 182 anonymously; they were asked to then return it to a box provided in a counsellor's  
48  
49 183 office. Respondents' names and other identifiers were not collected. Using this  
50  
51 184 procedure, we obtained 2498 valid questionnaires (total response rate: 78.1%). Of the  
52  
53 185 students who participated, 726 (response rate: 90.8%) came from Harbin Medical  
54  
55 186 University, 631 (78.9%) from Qiqihar Medical University, 459 (57.4%) from  
56  
57 187 Mudanjiang Medical University, and 682 (85.3%) from the Medical College of  
58  
59 188 Jiamusi University.

## 189 **2.2 Questionnaire**

190 We used the Attitudes toward Patient Safety Questionnaire III (APSQ-III) [12,18-21],  
191 which was specifically designed for students and covers nine key factors related to  
192 patient safety culture. The APSQ-III assesses several factors regarding patient safety  
193 culture, rather than examining differences in patient safety education. Therefore, this  
194 measure can more accurately reflect realistic educational needs [12].

195 The questionnaire consists of 26 items covering nine key patient safety factors:

- 196 (a) patient safety training received (items 1–3);
- 197 (b) error reporting confidence (items 4–6);
- 198 (c) working hours as an error cause (items 7–9);
- 199 (d) error inevitability (items 10–12);
- 200 (e) professional incompetence as an error cause (items 13–16);
- 201 (f) disclosure responsibility (items 17–19);
- 202 (g) team functioning (items 20 and 21);
- 203 (h) patient involvement in reducing error (items 22 and 23);
- 204 and (i) importance of patient safety in the curriculum (items 24–26).

## 205 **2.3 Data analyses**

206 Responses were recorded on a five-point Likert scale, with 5 = strongly agree and 1 =  
207 strongly disagree. Responses were grouped into agree (i.e. 4 or 5) and disagree (i.e. 1  
208 or 2), and overall percentages were obtained [12]. An analysis of variance was used to  
209 compare the rate of positive responses between students in different years of medical school.  
210 We also excluded unanswered questions from the analyses. Level of significance was  
211 set at  $p < 0.05$ .

## 212 **2.4 Ethics approval**

213 The study protocol was reviewed and approved by the Research Ethics Committee of  
214 Harbin Medical University. Before the survey, approval was also obtained from each  
215 school. All participants voluntarily and anonymously participated and provided their  
216 written informed consent.

## 217 **3. Results**

218 Of the Year 1–5 students who responded to the demographic questions, 1,055 (42.4%)

1  
2  
3 219 were male, and 1,435 (57.4%) were female. Response rates varied between cohorts  
4  
5 220 (from first to fifth-years): 399 (16%); 483 (19.3%); 587 (23.5%); 746 (29.9%); 283  
6  
7 221 (11.3%) (Table 1).

8  
9 222 Table 2 summarizes safety culture perceptions, by survey domain, for the combined  
10  
11 223 group and the four subgroups. The overall highest scores were for, 'patient safety  
12  
13 224 training received', 'patient involvement in reducing errors', 'I have a good  
14  
15 225 understanding of patient safety issues as a result of my undergraduate medical  
16  
17 226 training', and 'patients have an important role in preventing medical errors'. The  
18  
19 227 lowest average domain scores were for, 'professional incompetence as an error cause',  
20  
21 228 'disclosure responsibility', 'medical errors are a sign of incompetence', and 'it is not  
22  
229 necessary to report errors, which do not result in adverse outcomes for the patient'.

23  
24 230 Specific to each medical institution, the highest level of positive safety perceptions  
25  
26 231 was from Mudanjiang Medical College, with the highest score for the 'patient safety  
27  
28 232 training received' domain. Jiamusi Medical College was second with their highest  
29  
30 233 domain score for 'working hours as an error cause'. Qiqihar Medical University  
31  
32 234 reported their highest score for 'patient involvement in reducing errors'. The lowest  
33  
34 235 score among these three institutions was for 'professional incompetence as an error  
35  
36 236 cause'. The lowest positive patient safety perceptions came from Harbin Medical  
37  
38 237 University, with their highest domain score for 'patient safety training received', and  
39  
40 238 their lowest score for 'error reporting confidence'. There was a statistically significant  
41  
42 239 difference between schools on responses to all nine key patient safety factors.

43  
44 240 Table 3 summarizes safety culture perceptions based on survey domains for the  
45  
46 241 combined group and for the five subgroups. The table displays results sorted by safety  
47  
48 242 domain score. Perceptions of patient safety culture varied based on cohort. All five  
49  
50 243 cohorts had a positive perception of 'patient safety training received' and 'patient  
51  
52 244 involvement in reducing errors'. Moreover, first and second-year students' perceptions  
53  
54 245 of 'working hours as an error cause' were high. Third-year students had a better  
55  
56 246 awareness of 'team functioning'. In addition to the aforementioned domains, fourth  
57  
58 247 and fifth-year students also had a deep understanding of 'error inevitability'. The  
59  
60 248 lowest scores were in the 'professional incompetence as an error cause' and

1  
2  
3 249 'importance of patient safety in the curriculum' domains for all cohorts. Table 4 shows  
4  
5 250 that there was a significant difference ( $p < 0.05$ ) between cohorts on responses to the  
6  
7 251 factors 'patient safety training received', 'error reporting confidence', 'working hours  
8  
9 252 as an error cause', 'error inevitability', 'team functioning', 'patient involvement in  
10  
11 253 reducing errors', and 'importance of patient safety in the curriculum'.

#### 12 254 **4. Discussion**

13  
14 255 As patient safety is a top health care priority, all medical undergraduates should have  
15  
16 256 the necessary capacity to ensure minimal patient harm as they embark on their future  
17  
18 257 career. Education and training are key to achieving this goal [4]. As medical students  
19  
20 258 are an integral part of our future health care systems, their experiences during school  
21  
22 259 (and their perceptions of patient safety culture) have an important influence on their  
23  
24 260 attitudes toward patient safety and their behaviours within this domain [22]. Screening  
25  
26 261 perceptions in key areas regarding patient safety is an opportunity to improve clinical  
27  
28 262 acumen and future medical education. The present findings provide explicit medical  
29  
30 263 student perspectives relevant to critical clinical services. Such information can be  
31  
32 264 utilized by medical directors and clinical service supervisors for real-time assessment  
33  
34 265 while promoting a safety culture. The APSQ-III has a stable factor structure and  
35  
36 266 criterion validity; it can also distinguish between diverse student subgroups [12]. We  
37  
38 267 conducted the present study to demonstrate how the APSQ-III can identify differences  
39  
40 268 between different cohorts across several medical universities in Northeast China.

41 269 Overall, our study highlights that medical student opinions/evaluations regarding  
42  
43 270 patient safety cultures are positive [23]. Interestingly, although none of our  
44  
45 271 participants had received any formal teaching on the subject, students from all four  
46  
47 272 universities were more likely to report having been trained well in the subject (84.9%).  
48  
49 273 This finding is similar to that of a previous study by Leung in Hong Kong [12], who  
50  
51 274 revealed that the result could be due to students' misunderstanding or an inability to  
52  
53 275 distinguish teaching from what had been learned from the public media. We believe  
54  
55 276 that this may be due to a common psychological phenomenon of escaping  
56  
57 277 responsibility among students in China, which refers to the notion that students in this  
58  
59 278 culture are struggling to cope with and protect themselves in an intensely hierarchical

1  
2  
3 279 environment. This means that not only are they afraid to tell the truth, but they also  
4  
5 280 fear the effects of doing so on teachers' evaluations of them. Many students do not  
6  
7 281 want to acknowledge errors or defects, and they may be unwilling to report problems  
8  
9 282 to avoid poor evaluations or to fit in with their teams [4]. Therefore, more attention  
10  
11 283 must be paid to the phenomenon of reluctance to “speak up” in Chinese culture and  
12  
13 284 more vigilance is required to prevent this fear of exposing deficiencies.

14  
15 285 Compared with results from Leung, their three highest scores were for ‘working hours  
16  
17 286 as an error cause’, ‘error inevitability’, and ‘importance of patient safety in the  
18  
19 287 curriculum’. ‘Patient involvement in reducing error’ and ‘team functioning’ received  
20  
21 288 the lowest overall scores in that previous study [12]. In the present study, ‘patient  
22  
23 289 involvement in reducing errors’ and ‘patient safety training received’ were the most  
24  
25 290 positively endorsed domains, while ‘professional incompetence as an error cause’ and  
26  
27 291 ‘disclosure responsibility’ were strong barriers to positive student patient safety  
28  
29 292 perceptions. In contrast with students in Hong Kong, mainland students responded  
30  
31 293 positively to items relating to ‘patient involvement in reducing errors’. A probable  
32  
33 294 reason for this is that patients in Hong Kong must follow the arrangements made by  
34  
35 295 public medical institutions regarding waiting lists, hospitalisation, and surgery, in  
36  
37 296 accordance with the process established for their illness. They cannot choose their  
38  
39 297 doctors for themselves; however, they are generally trusting of doctors and hospitals.  
40  
41 298 In mainland China, however, the patient's understanding of their diagnosis and  
42  
43 299 treatment has been continuously improving, and the traditional medical model has  
44  
45 300 gradually been replaced by active patient participation [24]. The doctor and patient  
46  
47 301 undertake the process of medical decision-making together, and the patient has the  
48  
49 302 right to choose their doctor independently. In addition, medical staff often encourage  
50  
51 303 patients and their families to participate in procedures relating to diagnosis and  
52  
53 304 treatment [25]. This may include encouraging patients or family members to  
54  
55 305 participate in examining the label on an infusion bottle for the name of the drug,  
56  
57 306 reading drug information, and so on. Furthermore, previous work has shown that  
58  
59 307 patient participation can reduce the occurrence of medical errors [26]; therefore,

1  
2  
3 308 Chinese medical students have positive attitudes on the item.  
4  
5 309 Our study found that responses to the ‘professional incompetence as an error cause’  
6  
7 310 domain were negative, especially for the following items: ‘medical errors are a sign of  
8  
9 311 incompetence’ (32.5%), ‘medical students generally consider errors as inevitable’  
10  
11 312 (74.9%), and ‘even the most experienced and competent doctors make errors’ (84.3%);  
12  
13 313 however, the students lack a proper understanding regarding the reasons for errors.  
14  
15 314 Our results are similar to those of Moskowitz et al., who found that students in the US  
16  
17 315 were uncertain what defined an error and what led to medical errors [19].  
18  
19 316 Medical students generally agreed that medical errors are caused by humans and a  
20  
21 317 sign of incompetence (32.5%). This shows that the present sample of medical students  
22  
23 318 lacked awareness regarding systematic errors. Long working hours and medical staff  
24  
25 319 incompetence were noted by several students as important reasons for errors. This  
26  
27 320 may indicate that the students were placing an emphasis on human factors resulting in  
28  
29 321 errors. This is in line with findings from a previous study involving Hong Kong  
30  
31 322 students, where most students reported that ‘if they work hard, they can eliminate  
32  
33 323 errors’ was an effective strategy for preventing future errors [27]. These findings  
34  
35 324 could suggest a need for emphasizing the potential role of other factors (e.g. system  
36  
37 325 errors and procedural complexity) during the occurrence of medical errors.  
38  
39 326 Several students reported positive evaluations of their error reporting confidence, but  
40  
41 327 a punitive evaluation surrounding their responsibility in reporting (i.e. what and how  
42  
43 328 to report when witnessing a problem with patient care). Medical students’ high  
44  
45 329 confidence in reporting medical errors (74.9%) is similar to the results of a Turkish  
46  
47 330 study conducted by Karaoglu et al [28-29]. They found that 60.7% (n = 147) of  
48  
49 331 students stated that they would report an error to the hospital committee if they,  
50  
51 332 themselves, made a medical error. Furthermore, 68.6% (n = 166) of the students stated  
52  
53 333 that they would report a medical error they witnessed.  
54  
55 334 In Flin et al.’s study, most students stated they would speak up about an error.  
56  
57 335 However, this result was a bit confusing, since students also endorsed the item, ‘it is  
58  
59 336 not necessary to report errors that do not result in adverse outcomes for the patient’  
60  
337 (60.8%)[30]. More than 50% of students from the Medical College at Jiamusi

1  
2  
3 338 University agreed with this statement, as well. All members of the medical team,  
4  
5 339 including medical students, should be able to recognize unsafe conditions, report  
6  
7 340 errors, and improve error disclosure if not sufficiently conducted. This persistent  
8  
9 341 cultural change should contribute to the eradication of errors and reduce patient safety  
10  
11 342 concerns [31-33].

12 343 Several students agreed with the following statements: ‘my training is preparing me to  
13  
14 344 understand the causes of medical errors’ (84.8%) and ‘I have a good understanding of  
15  
16 345 patient safety issues because of my undergraduate medical training’ (85.2%). This  
17  
18 346 illustrates that medical students have grand expectations regarding patient safety  
19  
20 347 education, which is in line with the findings of Madigosky and colleagues [34]. This  
21  
22 348 US-based study revealed that awareness of patient safety and medical errors can be  
23  
24 349 increased and sustained using an experiential curriculum, which students rated as a  
25  
26 350 valuable experience [34-35].

27 351 Insights can also be gained from the similarities observed between the four medical  
28  
29 352 schools. The descending order of positive perceptions regarding patient safety cultures  
30  
31 353 from the four universities were as follows: Mudanjiang Medical University, the  
32  
33 354 Medical College of Jiamusi University, Qiqihar Medical University, and Harbin  
34  
35 355 Medical University. There was no evidence of different reporting practices between  
36  
37 356 the four medical schools. Yet, differences in local patient safety cultures, as well as  
38  
39 357 differences in students’ social and cultural backgrounds, may be significant  
40  
41 358 contributing factors [31]. However, the present study design did not enable an  
42  
43 359 exploration of these factors; we could only determine focal aspects of future teaching.  
44  
45 360 For example, Mudanjiang Medical University, the Medical College of Jiamusi  
46  
47 361 University, and Qiqihar Medical University would likely target education toward the  
48  
49 362 classification, and underlying mechanisms of medical errors. In contrast, Harbin  
50  
51 363 Medical University might target confidence in error reporting as an area for  
52  
53 364 improvement.

54 365 Our results are counter to those from other countries. For example, Flin et al.’s study  
55  
56 366 in the UK found that most first-year students reported ‘medium low’ or ‘average’  
57  
58 367 levels of knowledge regarding errors and patient safety issues [36-40]. Our results

1  
2  
3 368 revealed that positive perceptions of patient safety culture tended to decrease from  
4  
5 369 younger to older cohorts. As seen in Table 3, more senior students appeared to have  
6  
7 370 less positive perceptions of ‘error reporting confidence’ and ‘the importance of patient  
8  
9 371 safety in the curriculum’. Possible reasons include their experience of working in  
10  
11 372 strong clinical hierarchies, which is known to have a negative influence on error  
12  
13 373 reporting and disclosure of medical errors [41]. It is likely that this decrease in  
14  
15 374 medical error disclosure emerges as result of the increasing awareness and more  
16  
17 375 realistic self-assessment that students develop during the process of medical education  
18  
19 376 [42]. It could also be the result of inadequate training and preparation of young  
20  
21 377 doctors. Additionally, more senior students appeared to have less positive perceptions  
22  
23 378 of ‘the importance of patient safety in the curriculum’. A likely reason for this is that  
24  
25 379 from the first grade to the fifth grade in university, with the increasing number of  
26  
27 380 courses and pressure of examinations, students do not want to add new courses to the  
28  
29 381 curriculum. However, the underlying reason for this remains to be established.

30  
31 382 One of the limitations of this study is a possible non-response bias. Students who  
32  
33 383 agreed to respond to the survey may have been more likely than their non-responding  
34  
35 384 peers to be interested in patient safety. This greater level of interest may have led to  
36  
37 385 inflation of attitude ratings. Another limitation is that the study made use of a  
38  
39 386 non-standardised survey instrument, and that the APSQ-III is a self-assessment  
40  
41 387 questionnaire which addresses students' self-assessment of patient safety culture  
42  
43 388 rather than the actual teachings provided. Therefore, the present results may not be  
44  
45 389 indicative of students' actual skills and knowledge. Moreover extrapolation of the  
46  
47 390 findings to other medical colleges should be done with caution. Nevertheless, this is  
48  
49 391 the first use of the APSQ-III to compare patient safety cultures in different schools  
50  
51 392 and cohorts within mainland China. While the present sample was taken from only  
52  
53 393 one region in China, we covered almost all the medical colleges within a rather large  
54  
55 394 province. Furthermore, we recruited a cohort of medical students across five years of  
56  
57 395 their programs; therefore, the present study represents an important first step toward  
58  
59 396 patient safety education research in China. We believe that our findings can help  
60  
397 educators develop curricula for patient safety education.



1  
2  
3 398 In conclusion, our study researched perceptions of patient safety culture among  
4  
5 399 medical students in China. Our results further suggest that medical students'  
6  
7 400 perceptions regarding patient safety cultures can provide a tool for guiding medical  
8  
9 401 education. Institutions should have an increased emphasis on issues related to the  
10  
11 402 reasons behind medical errors and error reporting. Shifts in patient safety cultures  
12  
13 403 should be based on situations affecting different schools and cohorts, especially  
14  
15 404 among third-year medical students. Longitudinal studies using a validated instrument  
16  
17 405 should also be conducted to better evaluate patient safety education programs and  
18  
19 406 their relative impact on local healthcare development. Further studies should explore  
20  
21 407 the culture of reporting errors and how students in nursing and healthcare profession  
22  
23 408 programs address these errors.

## 409 **References**

- 410 1. Kohn LT, Corrigan JM, Donaldson MS, *et al.* To err is human. Building a safer  
411 health system. Washington DC: National Academies Press, 2000.
- 412 2. Willeumier D. Advocate health care: a systemwide approach to quality and  
413 safety[J]. Joint Commission Journal on Quality & Safety, 2004, 30(10):559.
- 414 3. Stefl M E. To Err is Human: Building a Safer Health System in 1999.[J]. Frontiers  
415 of Health Services Management, 2001, 18(1):1.
- 416 4. Liao J M, Etchegaray J M, Williams S T, *et al.* Assessing medical students'  
417 perceptions of patient safety: the medical student safety attitudes and  
418 professionalism survey[J]. Academic Medicine Journal of the Association of  
419 American Medical Colleges, 2014, 89(2):343.
- 420 5. Kirch D G, Boysen P G. Changing the culture in medical education to teach patient  
421 safety[J]. Health Affairs, 2010, 29(9):1600.
- 422 6. Chuang A W, Nuthalapaty F S, Casey P M, *et al.* To the point: reviews in medical  
423 education—taking control of the hidden curriculum[J]. American Journal of  
424 Obstetrics & Gynecology, 2010, 203(4):316.e1.
- 425 7. Institute of Medicine (US) Committee on Quality of Health Care in America.  
426 Crossing the Quality Chasm: A New Health System for the 21st Century[J]. BMJ,  
427 2001, 323(4): 1192.

- 428 8. Peterson C. Health professions education: a bridge to quality[J]. *Tar Heel Nurse*,  
429 2003, 65(4):12.
- 430 9. Flanagan B, Nestel D, Joseph M. Making patient safety the focus: crisis resource  
431 management in the undergraduate curriculum.[J]. *Medical Education*, 2004,  
432 38(1):56–66.
- 433 10. Sandars J, Bax N, Mayer D, et al. Educating undergraduate medical students about  
434 patient safety: Priority areas for curriculum development[J]. *Medical Teacher*,  
435 2007, 29(1):60-1.
- 436 11. Nie Y, Lin L, Duan Y, et al. Patient safety education for undergraduate medical  
437 students: a systematic review.[J]. *Bmc Medical Education*, 2011, 11(1):33.
- 438 12. Leung G K, Ang S B, Lau T C, et al. Patient safety culture among medical  
439 students in Singapore and Hong Kong[J]. *Singapore Medical Journal*, 2013,  
440 54(9):501-505.
- 441 13. Mingming Zhang, Yurong Duan, Jing Li, et al. Patient safety education: One of the  
442 important topics for 21<sup>st</sup> medical education[J]. *Chin J Evid-based*  
443 *Med.* 2010. 10(6):637-639.
- 444 14. Walton M M, Barraclough B H, Van Staalduinen S A, et al. An Educational  
445 Approach to Improving Healthcare Safety and Quality[J]. *Chinese Journal of*  
446 *Evidence-Based Medicine*, 2009, 2(3):136-142.
- 447 15. Hendee W R. To Err is Humans: Building a Safer Health System[J]. *Journal of*  
448 *Vascular & Interventional Radiology*, 2001, 12(1):112–113.
- 449 16. WHO Patient Safety Curriculum Guide for Medical Schools. 2009. Available from:  
450 <http://www.who.int/patientsafety/education/curriculum/download/en/index.html>.
- 451 17. China Statistical Yearbook of health and family planning. National Health and  
452 Family Planning Commission of the People's Republic of China. China Union  
453 Medical University Press. 2014.
- 454 18. Carruthers S, Lawton R, Sandars J, et al. Attitudes to patient safety amongst  
455 medical students and tutors: Developing a reliable and valid measure.[J]. *Medical*  
456 *Teacher*, 2009, 31(8):370-6.
- 457 19. James B, Roberts P R, Keryn V, et al. The Safety Attitudes Questionnaire:

- 1  
2  
3 458 psychometric properties, benchmarking data, and emerging research[J]. *Bmc*  
4 459 *Health Services Research*, 2006, 6(1):44.
- 6  
7 460 20. Wiggleton C, Petrusa E, Loomis K, et al. Medical students' experiences of moral  
8 461 distress: development of a web-based survey[J]. *Academic Medicine*, 2010,  
9 462 85(1):111-117.
- 11  
12 463 21. Etchegaray J M, Gallagher T H, Bell S K, et al. Error disclosure: a new domain for  
13 464 safety culture assessment.[J]. *Bmj Quality & Safety*, 2012, 21(7):594.
- 15  
16 465 22. Agency for Healthcare Research and Quality. Hospital Survey on Patient Safety  
17 466 Culture. [http://www.ahrq.gov/qual/](http://www.ahrq.gov/qual/patientsafetyculture/hospsurvindex.htm)  
18 466 [patientsafetyculture/hospsurvindex.htm](http://www.ahrq.gov/qual/patientsafetyculture/hospsurvindex.htm).  
19 467 Accessed October 17, 2013.
- 21  
22 468 23. Edition T. *Principles and Practice of Structural Equation Modeling*[J]. Guilford  
23 469 Press, 2015.
- 25  
26 470 24. Na Yuan, Chune Liu, Lei Yu. Study Process of Patients Involved in Treatment  
27 471 Decision—Making State Quo and Influencing Factors [J]. *Medicine and Society*,  
28 472 2017, 30(3):58-61.
- 30  
31 473 25. FAN Xin, LIU Zhijian, SUN Rongrong, et al. Discussion on the influence of  
32 474 patient safety Jculture to hospital safety management in China.[J]*Chinese*  
33 475 *Hospitals*. 2017,21(7):16-17
- 35  
36 476 26. Gongchun Lan, Wenguo Ying, Xiexin Qian, et al. Effective observation on  
37 477 prevention for mismatched intravenous infusion by patients' participation in  
38 478 double-identity confirmation.[J]. *Chinese Journal of Modern Nursing*, 2012,  
39 479 18(14):1657-1659.
- 41  
42 480 27. Leung G K, Patil N G. Patient safety in the undergraduate curriculum: medical  
43 481 students' perception.[J]. *Hong Kong medical journal = Xianggang yi xue za zhi /*  
44 482 *Hong Kong Academy of Medicine*, 2010, 16(2):101-5.
- 46  
47 483 28. Singer S J, Gaba D M, Falwell A, et al. Patient Safety Climate in 92 US Hospitals:  
48 484 Differences by Work Area and Discipline[J]. *Medical Care*, 2009, 47(1):23-31.
- 50  
51 485 29. Karaoglu N, Seker M, Kara F, Okka B. Knowledge of new entrant medical  
52 486 students about medical errors in Selcuk University: an educational perspective. *Tu*  
53 487 *rkiye Klinikleri Journal of Medical S ciences* 2008; 28(5):663–71.

- 1  
2  
3 488 30. Flin R, Patey R, Jackson J, et al. Year 1 medical undergraduates' knowledge of and  
4 attitudes to medical error.[J]. *Medical Education*, 2009, 43(12):1147–1155.  
5 489  
6  
7 490 31. Wetzel A P, Dow A W, Mazmanian P E. Patient safety attitudes and behaviors of  
8 graduating medical students.[J]. *Evaluation & the Health Professions*, 2012,  
9 491 35(2):221-238.  
10 492  
11  
12 493 32. Caldicott C V, Faber-Langendoen K. Deception, discrimination, and fear of  
13 reprisal: lessons in ethics from third-year medical students[J]. *Academic Medicine*  
14 494 *Journal of the Association of American Medical Colleges*, 2005, 80(9):866-73.  
15 495  
16  
17 496 33. Vohra P D, Johnson J K, Daugherty C K, et al. Housestaff and medical student  
18 attitudes toward medical errors and adverse events[J]. *Joint Commission Journal*  
19 497 *on Quality & Patient Safety*, 2007, 33(8):493.  
20 498  
21  
22 499 34. Madigosky W S, Headrick L A, Nelson K, et al. Changing and sustaining medical  
23 students' knowledge, skills, and attitudes about patient safety and medical  
24 fallibility.[J]. *Academic Medicine Journal of the Association of American Medical*  
25 500 *Colleges*, 2006, 81(1):94-101.  
26 501  
27  
28 502 35. Bowman C, Neeman N, Sehgal N L. Enculturation of unsafe attitudes and  
29 behaviors: student perceptions of safety culture.[J]. *Academic Medicine Journal of*  
30 503 *the Association of American Medical Colleges*, 2013, 88(6):802.  
31 504  
32  
33 505 36. Patey R, Flin R, Cuthbertson B H, et al. Patient safety: helping medical students  
34 understand error in healthcare.[J]. *Quality & Safety in Health Care*, 2007,  
35 506 16(4):256-259.  
36 507  
37  
38 508 37. Pearson P, Steven A, Howe A, et al. Learning about patient safety: organizational  
39 context and culture in the education of health care professionals[J]. *J Health Serv*  
40 509 *Res Policy*, 2010, 15 Suppl 1(15 Suppl 1):4-10.  
41 510  
42  
43 511 38. Walton M M. Hierarchies: the Berlin Wall of patient safety[J]. *Quality & Safety in*  
44 512 *Health Care*, 2006, 15(4):229.  
45 513  
46  
47 514 39. Brainard A H, Brislen H C. Viewpoint: learning professionalism: a view from the  
48 515 trenches.[J]. *Academic Medicine*, 2007, 82(11):1010-1014.  
49 516  
50  
51 517 40. Lucey C, Souba W. Perspective: the problem with the problem of  
52 professionalism[J]. *Academic Medicine Journal of the Association of American*  
53  
54  
55  
56  
57  
58  
59  
60

1  
2  
3 518 Medical Colleges, 2010, 85(6):1018.

4  
5 519 41. Tallentire V R, Smith S E, Skinner J, et al. Understanding the behaviour of newly  
6  
7 520 qualified doctors in acute care contexts[J]. Medical Education, 2011,  
8  
9 521 45(10):995-1005.

10  
11 522 42. Kiesewetter J, Kager M, Lux R, et al. German undergraduate medical students'  
12  
13 523 attitudes and needs regarding medical errors and patient safety--a national survey  
14  
15 524 in Germany.[J]. Medical Teacher, 2014, 36(6):505-10.

16 525 **Acknowledgements:**

17  
18 526 This study was funded by the Natural Science Foundation of China (71273002,  
19  
20 527 71473064); the New Century Excellent Talents of University at the Ministry of  
21  
22 528 Education, China (1252-NCET02); the China Postdoctoral Science Foundation  
23  
24 529 (2015M570211, 2016T90181); and Collaborative Innovation Centre of Social Risks  
25  
26 530 Governance in Health;Project of Education Department of Heilongjiang  
27  
28 531 Province(Education Reform Project, JGXM\_HLJ\_2014087);Social science  
29  
30 532 association of Heilongjiang Province(15058).

31  
32

33 534 **Author contributions statement:**

34 535 Mingli Jiao, Qunhong Wu, Ying Li and He Liu. designed the study; Jinghua Liu, Limin  
35  
36 536 Liu, Yanming Zhao, Kexin Jiang, Huiying Fang, Peihang Sun, Peng Li, Yameng Wang,  
37  
38 537 Haonan Jia and Yan Lu collected the data; He Liu, Ying Li, and Yuming Wu analysed  
39  
40 538 the data; He Liu, Ying Li, Mingli Jiao, Siqi Zhao drafted the manuscript; and Mingli  
41  
42 539 Jiao contributed to the manuscript's revision. All authors approved the final  
43  
44 540 manuscript for publication.

45 541 **Conflict of interest declaration:** The authors declare no conflict of interest

46 542 **Data sharing statement:** Data are available from the corresponding author upon  
47  
48 543 request.

49 544

50 545

51 546

52 547

53 548

54  
55  
56  
57  
58  
59  
60

549 Table 1 Participants' demographic characteristic

| Characteristic         | Number. (%) of respondents |            |            |            |
|------------------------|----------------------------|------------|------------|------------|
|                        | A                          | B          | C          | D          |
| Gender                 |                            |            |            |            |
| Male                   | 322 (44.4)                 | 261 (41.7) | 167 (36.4) | 305 (45)   |
| Female                 | 404 (55.6)                 | 366 (58.3) | 292 (63.6) | 377 (55)   |
| Year in medical school |                            |            |            |            |
| First year             | 111 (15.3)                 | 186 (29.5) | 36 (7.8)   | 66 (9.7)   |
| Second year            | 132 (18.2)                 | 146 (23.1) | 115 (25.1) | 90 (13.2)  |
| Third year             | 154 (21.2)                 | 117 (18.5) | 110 (24)   | 206 (30.2) |
| Fourth year            | 245 (33.7)                 | 100 (15.9) | 131 (28.5) | 270 (39.6) |
| Fifth year             | 84 (11.6)                  | 82 (13)    | 67 (14.6)  | 50 (7.3)   |
| Overall                | 726 (29.1)                 | 631 (25.3) | 459 (18.4) | 682 (27.3) |

550 A = Harbin Medical University; B = Qiqihar Medical University; C = Mudanjiang

551 Medical University; D = Medical College of Jiamusi University.

552 Table 2 Student responses to the items in the APSQ-III.

| Domain                                                                                                                                         | Positive responses (%) <sup>‡</sup> |                 |      |      |      |
|------------------------------------------------------------------------------------------------------------------------------------------------|-------------------------------------|-----------------|------|------|------|
|                                                                                                                                                | Overall                             | Between schools |      |      |      |
|                                                                                                                                                |                                     | A               | B    | C    | D    |
| <b>Patient safety training received</b>                                                                                                        | 84.9                                | 57.3            | 90   | 99.4 | 98.5 |
| 1. My training is preparing me to understand the causes of medical errors.                                                                     | 84.8                                | 56.6            | 89.7 | 99   | 99   |
| 2. I have a good understanding of patient safety issues as a result of my undergraduate medical training.                                      | 85.2                                | 58.4            | 90.2 | 99.8 | 97   |
| 3. My training is preparing me to prevent medical errors.                                                                                      | 84.7                                | 56.8            | 90.1 | 99.3 | 99.4 |
| <b>Error reporting confidence</b>                                                                                                              | 74.9                                | 53.1            | 75.8 | 85.6 | 88.1 |
| 4. I would feel comfortable reporting any errors I had made, no matter how serious the outcome had been for the patient.                       | 71.6                                | 52.9            | 68.5 | 80.5 | 85.7 |
| 5. I would feel comfortable reporting any errors other people had made, no matter how serious the outcome had been for the patient.            | 76.7                                | 53.4            | 79.8 | 88.1 | 89.5 |
| 6. I am confident I can talk openly to my supervisor about an error I had made, even if it resulted in potential or actual harm to my patient. | 76.5                                | 53.1            | 79   | 88.1 | 89.2 |
| <b>Working hours as an error cause</b>                                                                                                         | 83.4                                | 56.2            | 88.2 | 98   | 98.7 |

|                                                                                                               |      |       |      |      |      |
|---------------------------------------------------------------------------------------------------------------|------|-------|------|------|------|
| 7. Shorter shifts for doctors will reduce medical errors.                                                     | 81.7 | 53.9  | 85.9 | 97.1 | 97.3 |
| 8. By not taking regular breaks during shifts, doctors are at an increased risk of making errors.             | 84.7 | 57.8  | 89.8 | 98.9 | 99.5 |
| 9. The number of hours doctors work increases the likelihood of making medical errors.                        | 83.8 | 56.8  | 89   | 97.9 | 99.4 |
| <b>Error inevitability</b>                                                                                    | 74.9 | 55.2  | 80.9 | 87.1 | 82.2 |
| 10. Even the most experienced and competent doctors make errors.                                              | 84.3 | 56.7  | 89.4 | 99.8 | 98.7 |
| 11. A true professional does not make mistakes or errors. <sup>†</sup>                                        | 68.9 | 53    | 79.3 | 86.1 | 64.8 |
| 12. Human error is inevitable.                                                                                | 71.6 | 56    | 73.9 | 75.4 | 83.2 |
| <b>Professional incompetence as an error cause</b>                                                            | 58.4 | 53.25 | 59.6 | 61   | 60   |
| 13. Most medical errors result from careless nurses                                                           | 68.1 | 56.8  | 79   | 79.3 | 62.1 |
| 14. If people paid more attention at work, medical errors would be avoided <sup>†</sup>                       | 67.2 | 53.2  | 62.5 | 72.8 | 80.1 |
| 15. Most medical errors result from careless doctors <sup>†</sup>                                             | 65.8 | 55.1  | 74.2 | 77.1 | 61.4 |
| 16. Medical errors are a sign of incompetence <sup>†</sup>                                                    | 32.5 | 47.9  | 22.7 | 14.7 | 36.5 |
| <b>Disclosure responsibility</b>                                                                              | 69.4 | 55.1  | 72.6 | 78.4 | 74.8 |
| 17. It is not necessary to report errors which do not result in adverse outcomes for the patient <sup>†</sup> | 60.8 | 57.6  | 70.7 | 69.8 | 48.8 |
| 18. Doctors have a responsibility to disclose errors to patients only if the errors result in patient harm.   | 80.8 | 55    | 85.2 | 93.8 | 94.5 |
| 19. All medical errors should be reported.                                                                    | 66.7 | 52.6  | 61.9 | 71.6 | 81   |



1  
2  
3  
4  
5  
6  
7  
8  
9  
10  
11  
12  
13  
14  
15  
16  
17  
18  
19  
20  
21  
22  
23  
24  
25  
26  
27  
28  
29  
30  
31  
32  
33  
34  
35  
36  
37  
38  
39  
40  
41  
42  
43  
44  
45  
46  
47

|                                                                                                                                            |      |      |      |      |      |
|--------------------------------------------------------------------------------------------------------------------------------------------|------|------|------|------|------|
| <b>Team functioning</b>                                                                                                                    | 76.9 | 55.7 | 77.5 | 87.6 | 91.8 |
| 20. Better multidisciplinary teamwork will reduce medical errors.                                                                          | 69.2 | 54.9 | 64.5 | 75.4 | 84.5 |
| 21. Teaching students teamwork skills will reduce medical errors.                                                                          | 84.7 | 56.6 | 90.5 | 99.8 | 99.1 |
| <b>Patient involvement in reducing errors</b>                                                                                              | 84.7 | 56.7 | 90.2 | 99.4 | 98.7 |
| 22. Patients have an important role in preventing medical errors.                                                                          | 85.1 | 56.1 | 90.5 | 99.5 | 98.6 |
| 23. Encouraging patients to be more involved in their care can help to reduce the risk of medical errors occurring.                        | 84.5 | 57.3 | 90   | 99.3 | 98.8 |
| <b>Importance of patient safety in the curriculum</b>                                                                                      | 71.6 | 56.4 | 78.5 | 82.4 | 74.4 |
| 24. Teaching students about patient safety should be an important priority in medical students' training.                                  | 84.1 | 55.9 | 89.5 | 99.1 | 98.6 |
| 25. Patient safety issues cannot be taught; they can only be learned through clinical experience, which is gained when one is qualified. † | 46.6 | 55.8 | 55.4 | 50   | 25.3 |
| 26. Learning about patient safety issues before I qualify will enable me to become a more effective doctor.                                | 85   | 57.5 | 90.7 | 99.3 | 99.4 |

553 A = Harbin Medical University; B = Qiqihar Medical University; C = Mudanjiang Medical University; D = Medical College of Jiamusi  
554 University; †Positive responses are those with 'agree' or 'strongly agree'. The denominator for each question may vary because not every  
555 student responded to every question in the survey; † Negatively worded item, where the percent positive response is based on those who

556 responded, 'strongly disagree' or 'disagree.'

557

558 Table 3 Student responses to the nine factors in the APSQ-III.

|         |                        | Positive responses (%) <sup>‡</sup> |                            |                                 |                     |                                             |                           |                  |                                        |                                                |
|---------|------------------------|-------------------------------------|----------------------------|---------------------------------|---------------------|---------------------------------------------|---------------------------|------------------|----------------------------------------|------------------------------------------------|
| Schools | Year in medical school | Patient safety training received    | Error reporting confidence | Working hours as an error cause | Error inevitability | Professional incompetence as an error cause | Disclosure responsibility | Team functioning | Patient involvement in reducing errors | Importance of patient safety in the curriculum |
| A       | first                  | 78.6                                | 73.4                       | 79.7                            | 71.9                | 56.6                                        | 66.4                      | 73.9             | 80.8                                   | 50.7                                           |
|         | second                 | 74.3                                | 62.9                       | 74.4                            | 71.4                | 56                                          | 66.6                      | 64               | 71.9                                   | 49.8                                           |
|         | third                  | 57.1                                | 52.9                       | 56.2                            | 52.8                | 51.9                                        | 51.4                      | 57.5             | 55.1                                   | 41.5                                           |
|         | fourth                 | 43.1                                | 40                         | 40.5                            | 45.4                | 51.1                                        | 48.7                      | 42.7             | 42.8                                   | 37.6                                           |
|         | fifth                  | 45.2                                | 46.4                       | 42.6                            | 41.1                | 51.8                                        | 46.6                      | 51.2             | 42.7                                   | 33.7                                           |
| B       | first                  | 99.4                                | 84.7                       | 95.8                            | 86                  | 61.5                                        | 78.2                      | 84.1             | 98.9                                   | 62.6                                           |
|         | second                 | 97.2                                | 86.8                       | 95                              | 91.1                | 66.3                                        | 78.5                      | 87               | 99.1                                   | 59.8                                           |
|         | third                  | 98                                  | 72.7                       | 95.9                            | 83.8                | 59.2                                        | 63.3                      | 81.3             | 100                                    | 63.5                                           |
|         | fourth                 | 98.9                                | 86.5                       | 97.3                            | 84.4                | 60.9                                        | 77.5                      | 78.8             | 97.3                                   | 63.5                                           |

1  
2  
3  
4  
5  
6  
7  
8  
9  
10  
11  
12  
13  
14  
15  
16  
17  
18  
19  
20  
21  
22  
23  
24  
25  
26  
27  
28  
29  
30  
31  
32  
33  
34  
35  
36  
37  
38  
39  
40  
41  
42  
43  
44  
45  
46  
47

|   |        |      |      |      |      |      |      |      |      |      |
|---|--------|------|------|------|------|------|------|------|------|------|
|   | fifth  | 61.4 | 51.9 | 61.2 | 61.6 | 51.5 | 57.4 | 56.1 | 58.7 | 47.2 |
| C | first  | 99.1 | 90.3 | 96.1 | 91.9 | 62   | 84.1 | 86.4 | 98.2 | 63.5 |
|   | second | 99.6 | 90.3 | 98.3 | 84.2 | 63.6 | 81.2 | 81.1 | 99.5 | 63.2 |
|   | third  | 100  | 83.4 | 97.9 | 87.1 | 60.7 | 78.2 | 91   | 100  | 59.3 |
|   | fourth | 97   | 77.9 | 96.9 | 86.9 | 60   | 75.2 | 87.2 | 95.7 | 66.5 |
|   | fifth  | 99.7 | 79.9 | 99.4 | 85.2 | 58.5 | 70.9 | 92.6 | 100  | 58.2 |
| D | first  | 99.1 | 87.1 | 99.2 | 86   | 63.3 | 72.7 | 90.2 | 97.1 | 56.7 |
|   | second | 98.5 | 88.7 | 99.2 | 83.2 | 61.3 | 77.5 | 91   | 98.2 | 54.6 |
|   | third  | 97.1 | 87.2 | 97.2 | 82.9 | 59.9 | 74.8 | 89.3 | 99.2 | 57.8 |
|   | fourth | 100  | 96.1 | 100  | 74.2 | 52.3 | 67   | 97.7 | 100  | 52.4 |
|   | fifth  | 100  | 78   | 100  | 79.3 | 41   | 74.9 | 100  | 100  | 65.1 |

559 A = Harbin Medical University; B = Qiqihar Medical University; C = Mudanjiang Medical University; D = Medical College of Jiamusi  
 560 University; †Positive responses are those who responded, ‘agree’ or ‘strongly agree.’ The denominator for each question may vary because not  
 561 every student responded to every question in the survey.

562  
 563 Table 4 Factors in the APSQ-III that demonstrated significant differences between the five cohorts of four schools.

| Year in | Positive responses (%) <sup>†</sup> |
|---------|-------------------------------------|
|---------|-------------------------------------|

| medical school | Patient safety training received* | Error reporting confidence* | Working hours as an error cause* | Error inevitability* | Professional incompetence as an error cause | Disclosure responsibility | Team functioning* | Patient involvement in reducing errors* | Importance of patient safety in the curriculum* |
|----------------|-----------------------------------|-----------------------------|----------------------------------|----------------------|---------------------------------------------|---------------------------|-------------------|-----------------------------------------|-------------------------------------------------|
| first          | 93.5                              | 82.5                        | 91.7                             | 82.7                 | 60.4                                        | 74.4                      | 82.5              | 93.5                                    | 58.1                                            |
| second         | 91.9                              | 81.6                        | 90.9                             | 82.6                 | 61.9                                        | 75.8                      | 79.9              | 91.5                                    | 56.9                                            |
| third          | 87.4                              | 74.6                        | 86.4                             | 76                   | 57.8                                        | 67                        | 79.7              | 87.9                                    | 54.9                                            |
| fourth         | 80.7                              | 73.2                        | 79.5                             | 68.2                 | 54.4                                        | 63.9                      | 75.3              | 80                                      | 51.5                                            |
| fifth          | 72.4                              | 61.8                        | 71.7                             | 64.7                 | 51.6                                        | 60.4                      | 71                | 71                                      | 49.1                                            |

564 \*P<0.05; †Positive responses are those who responded, ‘agree’ or ‘strongly agree.’ The denominator for each question may vary because not  
 565 every student responded to every question in the survey.

STROBE Statement—Checklist of items that should be included in reports of *cross-sectional studies*

|                              | Item No | Recommendation                                                                                                                                                                                    | Reported on page # |
|------------------------------|---------|---------------------------------------------------------------------------------------------------------------------------------------------------------------------------------------------------|--------------------|
| <b>Title and abstract</b>    | 1       | (a) Indicate the study's design with a commonly used term in the title or the abstract                                                                                                            | 1                  |
|                              |         | (b) Provide in the abstract an informative and balanced summary of what was done and what was found                                                                                               | 2                  |
| <b>Introduction</b>          |         |                                                                                                                                                                                                   |                    |
| Background/rationale         | 2       | Explain the scientific background and rationale for the investigation being reported                                                                                                              | 3-6                |
| Objectives                   | 3       | State specific objectives, including any prespecified hypotheses                                                                                                                                  | 6                  |
| <b>Methods</b>               |         |                                                                                                                                                                                                   |                    |
| Study design                 | 4       | Present key elements of study design early in the paper                                                                                                                                           | 6                  |
| Setting                      | 5       | Describe the setting, locations, and relevant dates, including periods of recruitment, exposure, follow-up, and data collection                                                                   | 6                  |
| Participants                 | 6       | (a) Give the eligibility criteria, and the sources and methods of selection of participants                                                                                                       | 6                  |
| Variables                    | 7       | Clearly define all outcomes, exposures, predictors, potential confounders, and effect modifiers. Give diagnostic criteria, if applicable                                                          | 6                  |
| Data sources/<br>measurement | 8*      | For each variable of interest, give sources of data and details of methods of assessment (measurement). Describe comparability of assessment methods if there is more than one group              | 6-7                |
| Bias                         | 9       | Describe any efforts to address potential sources of bias                                                                                                                                         | 6                  |
| Study size                   | 10      | Explain how the study size was arrived at                                                                                                                                                         | 6                  |
| Quantitative variables       | 11      | Explain how quantitative variables were handled in the analyses. If applicable, describe which groupings were chosen and why                                                                      | 6-7                |
| Statistical methods          | 12      | (a) Describe all statistical methods, including those used to control for confounding                                                                                                             | 7                  |
|                              |         | (b) Describe any methods used to examine subgroups and interactions                                                                                                                               | 6                  |
|                              |         | (c) Explain how missing data were addressed                                                                                                                                                       | 6                  |
|                              |         | (d) If applicable, describe analytical methods taking account of sampling strategy                                                                                                                | 6                  |
|                              |         | (e) Describe any sensitivity analyses                                                                                                                                                             |                    |
| <b>Results</b>               |         |                                                                                                                                                                                                   |                    |
| Participants                 | 13*     | (a) Report numbers of individuals at each stage of study—eg numbers potentially eligible, examined for eligibility, confirmed eligible, included in the study, completing follow-up, and analysed | 7-8, 19            |
|                              |         | (b) Give reasons for non-participation at each stage                                                                                                                                              |                    |
|                              |         | (c) Consider use of a flow diagram                                                                                                                                                                |                    |
| Descriptive data             | 14*     | (a) Give characteristics of study participants (eg demographic, clinical, social) and information on exposures and potential confounders                                                          | 7                  |
|                              |         | (b) Indicate number of participants with missing data for each variable of interest                                                                                                               | 6, 19              |
| Outcome data                 | 15*     | Report numbers of outcome events or summary measures                                                                                                                                              | 6-9                |
| Main results                 | 16      | (a) Give unadjusted estimates and, if applicable, confounder-adjusted                                                                                                                             |                    |

|                          |    |                                                                                                                                                                            |             |
|--------------------------|----|----------------------------------------------------------------------------------------------------------------------------------------------------------------------------|-------------|
|                          |    | estimates and their precision (eg, 95% confidence interval). Make clear which confounders were adjusted for and why they were included                                     |             |
|                          |    | (b) Report category boundaries when continuous variables were categorized                                                                                                  |             |
|                          |    | (c) If relevant, consider translating estimates of relative risk into absolute risk for a meaningful time period                                                           |             |
| Other analyses           | 17 | Report other analyses done—eg analyses of subgroups and interactions, and sensitivity analyses                                                                             |             |
| <b>Discussion</b>        |    |                                                                                                                                                                            |             |
| Key results              | 18 | Summarise key results with reference to study objectives                                                                                                                   | 9-12, 19-25 |
| Limitations              | 19 | Discuss limitations of the study, taking into account sources of potential bias or imprecision. Discuss both direction and magnitude of any potential bias                 | 13          |
| Interpretation           | 20 | Give a cautious overall interpretation of results considering objectives, limitations, multiplicity of analyses, results from similar studies, and other relevant evidence | 13          |
| Generalisability         | 21 | Discuss the generalisability (external validity) of the study results                                                                                                      | 13          |
| <b>Other information</b> |    |                                                                                                                                                                            |             |
| Funding                  | 22 | Give the source of funding and the role of the funders for the present study and, if applicable, for the original study on which the present article is based              | 17-18       |

\*Give information separately for exposed and unexposed groups.

**Note:** An Explanation and Elaboration article discusses each checklist item and gives methodological background and published examples of transparent reporting. The STROBE checklist is best used in conjunction with this article (freely available on the Web sites of PLoS Medicine at <http://www.plosmedicine.org/>, Annals of Internal Medicine at <http://www.annals.org/>, and Epidemiology at <http://www.epidem.com/>). Information on the STROBE Initiative is available at [www.strobe-statement.org](http://www.strobe-statement.org).

# BMJ Open

## Perceptions of patient safety culture among medical students: A cross-sectional investigation in Heilongjiang Province, China

|                                 |                                                                                                                                                                                                                                                                                                                                                                                                                                                                                                                                                                                                                                                                                                                                                                                                                                                                                                                                                                                                                                                                                                                                                                                                                                                                                                                                                                                                                                                                                                                                                                                                                                                                                        |
|---------------------------------|----------------------------------------------------------------------------------------------------------------------------------------------------------------------------------------------------------------------------------------------------------------------------------------------------------------------------------------------------------------------------------------------------------------------------------------------------------------------------------------------------------------------------------------------------------------------------------------------------------------------------------------------------------------------------------------------------------------------------------------------------------------------------------------------------------------------------------------------------------------------------------------------------------------------------------------------------------------------------------------------------------------------------------------------------------------------------------------------------------------------------------------------------------------------------------------------------------------------------------------------------------------------------------------------------------------------------------------------------------------------------------------------------------------------------------------------------------------------------------------------------------------------------------------------------------------------------------------------------------------------------------------------------------------------------------------|
| Journal:                        | <i>BMJ Open</i>                                                                                                                                                                                                                                                                                                                                                                                                                                                                                                                                                                                                                                                                                                                                                                                                                                                                                                                                                                                                                                                                                                                                                                                                                                                                                                                                                                                                                                                                                                                                                                                                                                                                        |
| Manuscript ID                   | bmjopen-2017-020200.R3                                                                                                                                                                                                                                                                                                                                                                                                                                                                                                                                                                                                                                                                                                                                                                                                                                                                                                                                                                                                                                                                                                                                                                                                                                                                                                                                                                                                                                                                                                                                                                                                                                                                 |
| Article Type:                   | Research                                                                                                                                                                                                                                                                                                                                                                                                                                                                                                                                                                                                                                                                                                                                                                                                                                                                                                                                                                                                                                                                                                                                                                                                                                                                                                                                                                                                                                                                                                                                                                                                                                                                               |
| Date Submitted by the Author:   | 18-May-2018                                                                                                                                                                                                                                                                                                                                                                                                                                                                                                                                                                                                                                                                                                                                                                                                                                                                                                                                                                                                                                                                                                                                                                                                                                                                                                                                                                                                                                                                                                                                                                                                                                                                            |
| Complete List of Authors:       | <p>Liu, He; Hebei Medical University, Office of Academic Affairs</p> <p>Li, Ying; Harbin Medical University, Department of Health Policy and Hospital Management</p> <p>Zhao, Siqi; Hebei Medical University, Department of Nursing Psychology and Humanities</p> <p>Jiao, Mingli; Harbin Medical University, Health policy ; Chinese Academy of Social Science, Institute of Quantitative &amp; Technical Economics</p> <p>Lu, Yan; Jiamusi University, School of Public Health</p> <p>Liu, Jinghua; QiQihar Medical University</p> <p>Jiang, Kexin; Harbin Medical University, Department of Health Policy and Hospital Management, School of Public Health</p> <p>Fang, Huiying; Harbin Medical University, Department of Health, Policy and Hospital Management, School of Public Health</p> <p>Sun, Peihang; Harbin Medical University, Department of Health, Policy and Hospital Management, School of Public Health</p> <p>Li, Peng; Harbin Medical University, Department of Health Policy and Hospital Management, School of Public Health</p> <p>Wang, Yameng; Harbin Medical University, Department of Health Policy and Hospital Management</p> <p>Jia, Haonan; Harbin Medical University, Department of Health Policy and Hospital Management, School of Public Health</p> <p>Wu, Yuming; Hebei Medical University, Department of physiology, School of basic medicine</p> <p>Liu, Limin; The 2nd Affiliated Hospital of Harbin Medical University, Medical record room</p> <p>Zhao, Yanming; The 2nd Affiliated Hospital of Harbin Medical University, CT room</p> <p>Wu, Qunhong; Harbin Medical University, Department of Social Medicine, School of Public Health</p> |
| <b>Primary Subject Heading</b>: | Public health                                                                                                                                                                                                                                                                                                                                                                                                                                                                                                                                                                                                                                                                                                                                                                                                                                                                                                                                                                                                                                                                                                                                                                                                                                                                                                                                                                                                                                                                                                                                                                                                                                                                          |
| Secondary Subject Heading:      | Health policy, Medical education and training                                                                                                                                                                                                                                                                                                                                                                                                                                                                                                                                                                                                                                                                                                                                                                                                                                                                                                                                                                                                                                                                                                                                                                                                                                                                                                                                                                                                                                                                                                                                                                                                                                          |
| Keywords:                       | medical education, patient safety, medicine students                                                                                                                                                                                                                                                                                                                                                                                                                                                                                                                                                                                                                                                                                                                                                                                                                                                                                                                                                                                                                                                                                                                                                                                                                                                                                                                                                                                                                                                                                                                                                                                                                                   |
|                                 |                                                                                                                                                                                                                                                                                                                                                                                                                                                                                                                                                                                                                                                                                                                                                                                                                                                                                                                                                                                                                                                                                                                                                                                                                                                                                                                                                                                                                                                                                                                                                                                                                                                                                        |

1  
2  
3  
4  
5  
6  
7  
8  
9  
10  
11  
12  
13  
14  
15  
16  
17  
18  
19  
20  
21  
22  
23  
24  
25  
26  
27  
28  
29  
30  
31  
32  
33  
34  
35  
36  
37  
38  
39  
40  
41  
42  
43  
44  
45  
46  
47  
48  
49  
50  
51  
52  
53  
54  
55  
56  
57  
58  
59  
60

SCHOLARONE™  
Manuscripts

For peer review only



1 **Perceptions of patient safety culture among medical students: A cross-sectional**  
2 **investigation in Heilongjiang Province, China**

3 **He Liu<sup>1†</sup>, Ying Li<sup>2†</sup>, Siqi Zhao<sup>3</sup>, Mingli Jiao<sup>2,4\*</sup>, Yan Lu<sup>5</sup>, Jinghua Liu<sup>6</sup>, Kexin Jiang<sup>2</sup>, Huiying**  
4 **Fang<sup>2</sup>, Peihang Sun<sup>2</sup>, Peng Li<sup>2</sup>, Yameng Wang<sup>2</sup>, Haonan Jia<sup>2</sup>, Yuming Wu<sup>7</sup>, Limin Liu<sup>8</sup>,**  
5 **Yanming Zhao<sup>9</sup>, Qunhong Wu<sup>10\*</sup>**

- 6  
7 1 Office of Academic Affairs, Hebei Medical University, 361 Zhongshan East Road, Chang'an  
8 District, Shijiazhuang 050017, China; E-Mail: 771773207@qq.com (H.L.)
- 9 2 Department of Health Policy and Hospital Management, School of Public Health, Harbin  
10 Medical University, 157 Baojian Road, Nangang District, Harbin 150081, China; E-Mails:  
11 1690342267@qq.com (Y.L.); 576732775@qq.com (S.Z.); jiangkexin1994@163.com (K.J.);  
12 565453428@qq.com (H.F.); 745450570@qq.com (P.S.); 18845146293@163.com (P.L.);  
13 984453904@qq.com (Y.W.); 495150755@163.com (H.J.)
- 14 3 Department of Psychology and Humanities Nursing, Hebei Medical University, Donggang  
15 Road 48, Yuhua District, Shijiazhuang 050017, China; E-Mail: siqizhao1992@foxmail.com  
16 (S.Z.)
- 17 4 Institute of Quantitative & Technical Economics, Chinese Academy of Social Science, 5 Jian  
18 guo men nei Road, Dongcheng District, Beijing 100000, China; E-Mail: minglijiao@  
19 126.com (M.J.)
- 20 5 School of Public Health, Jiamusi University, Jiamusi 154007, China; E-Mail:  
21 yanlulyan@163.com (Y.L.)
- 22 6 School of Public Health, Qiqihar Medical University, Qiqihar 161006, China; E-Mail:  
23 liujinghuaahl@126.com (J.L.)
- 24 7 Department of physiology, School of Masic medicine, Hebei Medical University, 361  
25 Zhongshan Road, Changan District, Shijiazhuang 050017, China; E-Mail:  
26 wuyanmingymw@126.com (Y.W.)
- 27 8 Medical Record Room, The 2nd Affiliated Hospital of Harbin Medical University,  
28 Harbin 150081, China; E-Mail: liuliminlml@126.com (L.L.)
- 29 9 CT Room, The 2nd Affiliated Hospital of Harbin Medical University, Harbin 150081, China;  
30 E-Mail: yanmingzhaozym@163.com (Y.Z.)
- 31 10 Department of Social Medicine, School of Public Health, Harbin Medical University, 157  
32 Baojian Road, Nangang District, Harbin 150081, China; E-Mail: wuqunhong12345@163.com  
33 (Q.W.)

34  
35 †These authors contributed equally to this work.

36 \*Correspondence: minglijiao@126.com and wuqunhong12345@163.com

37  
38

39

**Abstract**

**Objectives:** The medical school education plays an important role in promoting patient safety. In this study, we assess medical students' perceptions of patient safety culture, identify their educational needs, and provide evidence on the most important content relating to patient safety for the medical school curriculum.

**Method:** This cross-sectional study was conducted in four medical universities in Heilongjiang province. First through fifth year medical students completed an anonymous questionnaire—the Attitudes toward Patient Safety Questionnaire III (APSQ-III). We analysed the differences in responses across the four universities and cohorts.

**Results:** Overall perceptions of patient safety culture across the four medical universities were positive. The highest positive response rate was for 'I have a good understanding of patient safety issues as a result of my undergraduate medical training' (range: 58.4%–99.8%), whereas the lowest positive response rate was for 'medical errors are a sign of incompetence' (14.7%–47.9%). Respondents in the earlier years of school tended to have more positive responses for items concerning working hours and teamwork; however, fourth and fifth year students had more positive responses for error inevitability. Items with the lowest positive response rates across the cohorts included items related to 'professional incompetence as a cause of error' and 'disclosure responsibility'.

**Conclusions:** While students had generally positive views of the patient safety culture, none of them had been exposed to any formal curriculum content on patient safety. Policymakers should focus more on how educational needs vary across schools and cohorts in order to establish appropriate curricula.

**Keywords:** medical education, patient safety, medicine students

**Strengths and limitations of this study**

- ▶ This is the first study to use the APSQ-III to compare patient safety culture across different medical schools and grades in Heilongjiang province, China.

- 1  
2  
3 69 ► We covered almost all the medical colleges in Heilongjiang province.  
4  
5 70 ► The study is limited by the potential non-response bias. Students who responded  
6  
7 71 to the survey might have been more interested than their peers in patient safety,  
8  
9 72 which might have inflated the attitude ratings.  
10  
11 73 ► The results might not be generalisable to all medical colleges in China, although  
12  
13 74 our sample size was large.

## 14 75 **1. Introduction**

16 76 Providing patients with a safe and comfortable medical environment is an important  
17  
18 77 task for medical and healthcare organizations worldwide. Indeed, in 1999, the  
19  
20 78 Institute of Medicine (IOM) released a report called ‘To Err Is Human: Building a  
21  
22 79 Safer Health System’ to highlight the importance of patient safety.<sup>1</sup> Studies conducted  
23  
24 80 in several countries have shown that a lack of attention to patient safety can lead to  
25  
26 81 medical errors, which in turn can harm patients and increase their hospitalization  
27  
28 82 time.<sup>2 3</sup> Hence, the maintenance and promotion of patient safety is of utmost  
29  
30 83 importance.

31 84 The advancement of patient safety requires a fundamental change in the healthcare  
32  
33 85 culture. Reducing harm through an improved safety culture is a global priority.<sup>4</sup>  
34  
35 86 Policymakers, payers, and groups such as the Agency for Healthcare Research and  
36  
37 87 Quality (AHRQ), National Patient Safety Agency, and World Health Organization  
38  
39 88 have developed numerous safety initiatives at the national and institutional levels.<sup>5</sup>  
40  
41 89 However, most of these initiatives targeted doctors, managers, and other healthcare  
42  
43 90 professionals—rather less attention has been paid to medical students, who are the  
44  
45 91 next generation of medical workers.<sup>6</sup> It is essential for medical students to have a  
46  
47 92 good understanding of the patient safety culture. Because this understanding will  
48  
49 93 doubtlessly influence their treatment of patient safety issues throughout their working  
50  
51 94 lives

51 95 In 1980, Hilfiker proposed that medical graduates lack the ability to handle medical  
52  
53 96 errors.<sup>7</sup> Even by 1998, Pilpel and his colleagues found that there was not yet any  
54  
55 97 formal document for medical students that described how to handle medical errors.<sup>8</sup>  
56  
57 98 While the launch of the ‘Building a Safer Health Care System’ in 1999 triggered a

1  
2  
3 99 global discussion of patient safety issues,<sup>1</sup> a later study by Leape et al. concluded that  
4  
5 100 the status of patient safety education is not optimal.<sup>9</sup> The Australian Health Safety and  
6  
7 101 Quality Committee published the National Patient Safety Education Framework  
8  
9 102 (NPSF) in 2005.<sup>10</sup> Then, in 2008, the WHO launched the first expert committee on  
10  
11 103 patient safety issues in undergraduate medical curricula.<sup>11</sup> Subsequently, the  
12  
13 104 Patient Safety Alliance conducted pilot studies in 11 schools worldwide, and  
14  
15 105 proposed that advocacy for patient safety activities is one of the most important  
16  
17 106 WHO initiatives in the 21st century globally.

18 107 The primary prerequisite for the implementation of education on patient safety culture  
19  
20 108 is to understand medical students' current awareness of a safety culture. To this end,  
21  
22 109 Carruthers et al. used the Attitudes toward Patient Safety Questionnaire (APSQ) to  
23  
24 110 study medical students' perceptions of the patient safety culture.<sup>12</sup> Similarly, Liao et  
25  
26 111 al. surveyed 367 medical students at three medical colleges in the United States about  
27  
28 112 the patient safety culture,<sup>5</sup> while Bowman et al. explored knowledge of patient safety  
29  
30 113 culture among 170 medical students at the University of California at San Francisco.<sup>13</sup>  
31  
32 114 Leung et al. surveyed second year students at medical schools in Hong Kong and  
33  
34 115 Singapore about their perceptions of the patient safety culture and compared their  
35  
36 116 different educational needs.<sup>14</sup> However, patient safety education in areas with low  
37  
38 117 medical standards and high medical risks—for example, in developing countries  
39  
40 118 like China—is still in its infancy.<sup>15</sup> One thing we do understand, from a report  
41  
42 119 exploring safety education content and teaching methods in China,<sup>16</sup> is that patient  
43  
44 120 safety education has not been fully implemented within the curricula and clinical  
45  
46 121 practice therein.

47 122 Heilongjiang province, as the healthcare centre of Northeast China, has the largest  
48  
49 123 area and availability of health resources, and it has more than 30 million people.<sup>17</sup>  
50  
51 124 Heilongjiang province has four prominent medical schools that provide medical and  
52  
53 125 health service personnel training for the entire province: Harbin Medical University,  
54  
55 126 Qiqihar Medical University, Mudanjiang Medical University, and the Medical College  
56  
57 127 of Jiamusi University. Of these, Harbin Medical University has the best educational  
58  
59 128 reputation and most stringent entrance requirements, although the others (along with

1  
2  
3 129 their affiliated tertiary hospitals) have good reputations as well. However, there are no  
4  
5 130 studies examining perceptions of a patient safety culture among medical students in  
6  
7 131 Heilongjiang province, and few in China as a whole. Understanding current  
8  
9 132 perceptions of the patient safety culture and identifying medical students' most urgent  
10  
11 133 educational needs in that area, is critical for the effective design and successful  
12  
13 134 implementation of education programs at Heilongjiang's medical institutions.  
14  
15 135 Consequently, we evaluated the students' perceptions of the patient safety culture at  
16  
17 136 these four medical schools, with the goal of identifying domains critical to  
18  
19 137 transforming patient safety perspectives and addressing students' educational needs.

## 20 138 **2. Methods**

### 21 139 **2.1 Sampling and Data collection**

22  
23 140 In 2014, we conducted a cross-sectional survey of four medical schools in  
24  
25 141 Heilongjiang province. The cooperation of the schools was obtained by contacting the  
26  
27 142 managers of the student affairs offices. While some of these schools offered courses in  
28  
29 143 doctor-patient relations and evidence-based medicine, none of them had a dedicated  
30  
31 144 or systematic patient safety course. Furthermore, none of the students had received  
32  
33 145 any prior formal teaching on patient safety. As such, we could obtain a baseline  
34  
35 146 assessment of these students' views on the patient safety culture. We used systematic  
36  
37 147 random sampling to select 800 clinical medical students from a roster of all medical  
38  
39 148 undergraduates at each school. We provided these students with detailed explanations  
40  
41 149 of the objective of this investigation; some students expressed interest in participating  
42  
43 150 in the survey, while others declined to participate. Students who were willing to  
44  
45 151 participate were given two days to complete the questionnaire anonymously, after  
46  
47 152 which they returned it to a box provided in a counsellor's office. We did not collect  
48  
49 153 respondents' names or any other identifiers. Using this procedure, we obtained 2498  
50  
51 154 valid questionnaires (total response rate: 78.1%). Of the students who participated,  
52  
53 155 726 (response rate: 90.8%) came from Harbin Medical University, 631 (78.9%) from  
54  
55 156 Qiqihar Medical University, 459 (57.4%) from Mudanjiang Medical University, and  
56  
57 157 682 (85.3%) from the Medical College of Jiamusi University.

### 58 158 **2.2 Questionnaire**

1  
2  
3 159 We used the APSQ-III,<sup>12 14 18-20</sup> which was specifically designed for students and  
4  
5 160 covers nine key domains related to the patient safety culture. The APSQ-III assesses  
6  
7 161 several domains regarding patient safety culture, rather than examining differences in  
8  
9 162 patient safety education. As such, it can more accurately reflect realistic educational  
10  
11 163 needs.<sup>14</sup> The APSQ-III has a stable domain structure and criterion validity; it can also  
12  
13 164 distinguish between diverse student subgroups.<sup>14</sup>

14 165 The questionnaire comprises 26 items covering nine key patient safety domains:

- 15  
16 166 (a) patient safety training received (items 1–3);  
17  
18 167 (b) error reporting confidence (items 4–6);  
19  
20 168 (c) working hours as an error cause (items 7–9);  
21  
22 169 (d) error inevitability (items 10–12);  
23  
24 170 (e) professional incompetence as an error cause (items 13–16);  
25  
26 171 (f) disclosure responsibility (items 17–19);  
27  
28 172 (g) team functioning (items 20 and 21);  
29  
30 173 (h) patient involvement in reducing error (items 22 and 23); and  
31  
32 174 (i) importance of patient safety in the curriculum (items 24–26).

### 33 175 **2.3 Data analyses**

34 176 Responses were recorded on a five-point Likert scale, with 5 = strongly agree and 1 =  
35 177 strongly disagree. Responses were grouped into agree (i.e. 4 or 5) and disagree (i.e. 1  
36 178 or 2), and overall percentages were obtained.<sup>14</sup> An analysis of variance was used to  
37  
38 179 compare the positive responses rate among students in different years of medical  
39  
40 180 school. We also excluded unanswered questions from the analyses. The significance  
41  
42 181 was set at  $p < 0.05$ .

### 43 182 **2.4 Patient and public involvement**

44  
45 183 Patients and public are not involved in the process of this study. As described in more  
46  
47 184 detail in the methods section, we investigated the cognition of medical students on  
48  
49 185 patient safety culture. And the participants will be informed of the study results via  
50  
51 186 lectures in their schools.

### 52 187 **2.5 Ethics approval**

1  
2  
3 188 The study protocol was reviewed and approved by the Research Ethics Committee of  
4 189 Harbin Medical University. Before conducting the survey, we obtained approval from  
5 190 each school. All participants voluntarily and anonymously participated and provided  
6 191 their written informed consent.

### 192 **3. Results**

193 Of the students who responded to the demographic questions, 1,055 (42.4%) were  
194 male, and 1,435 (57.4%) were female. The response rates varied among the school  
195 year cohorts: first year, 399 (16%); second year, 483 (19.3%); third year, 587 (23.5%);  
196 fourth year, 746 (29.9%); and fifth year, 283 (11.3%) (Table 1).

197 Table 2 summarizes the patient safety culture perceptions, by survey domain, for the  
198 total sample and the four subgroups by medical school. The overall highest positive  
199 response rates were for the following domains: ‘patient safety training received’,  
200 ‘patient involvement in reducing errors’, ‘I have a good understanding of patient  
201 safety issues as a result of my undergraduate medical training’, and ‘patients have an  
202 important role in preventing medical errors’. The lowest positive response rates were  
203 for the domains ‘professional incompetence as an error cause’, ‘disclosure  
204 responsibility’, ‘medical errors are a sign of incompetence’, and ‘it is not necessary to  
205 report errors, which do not result in adverse outcomes for the patient’.

206 When looking at specific medical schools, the highest positive response rates were  
207 found in Mudanjiang Medical College, for the domain ‘patient safety training  
208 received’. Jiamusi Medical College had the second highest rates overall, and its  
209 highest positive response rate was for the domain ‘working hours as an error cause’.  
210 In Qiqihar Medical University, the highest positive response rate was for ‘patient  
211 involvement in reducing errors’. In all four institutions, the lowest positive response  
212 rate was for ‘professional incompetence as an error cause’. The overall lowest positive  
213 response rates came from Harbin Medical University; the highest positive response  
214 rate was for the domain ‘patient safety training received’, and the lowest for ‘error  
215 reporting confidence’. We observed statistically significant differences among the  
216 schools in their responses to all nine key patient safety domains.

217 Table 3 summarizes the patient safety culture perceptions for the total sample and five

1  
2  
3 218 school year cohorts, according to the APSQ-III domains. Perceptions of patient safety  
4  
5 219 culture varied noticeably according to school year. All five cohorts had a positive  
6  
7 220 perception of ‘patient safety training received’ and ‘patient involvement in reducing  
8  
9 221 errors’. However, first and second year students had more positive perceptions of  
10  
11 222 ‘working hours as an error cause’, while third year students had a more positive view  
12  
13 223 of ‘team functioning’. Besides the aforementioned domains, fourth and fifth year  
14  
15 224 students had high positive response rates for ‘error inevitability’. The lowest positive  
16  
17 225 response rates were for ‘professional incompetence as an error cause’ and ‘importance  
18  
19 226 of patient safety in the curriculum’ for all cohorts. As shown in Table 4, there was a  
20  
21 227 significant difference ( $p < 0.05$ ) among cohorts in their positive response rates for  
22  
23 228 ‘patient safety training received’, ‘error reporting confidence’, ‘working hours as an  
24  
25 229 error cause’, ‘error inevitability’, ‘team functioning’, ‘patient involvement in reducing  
26  
27 230 errors’, and ‘importance of patient safety in the curriculum’.

#### 231 **4. Discussion**

232 Patient safety is a top health care priority, and all medical undergraduates must have  
233 the necessary capacity to minimize patient harm as they embark on their future career.  
234 Education and training are key to achieving this goal.<sup>5</sup> Medical students’ experiences  
235 at medical school, as well as their perceptions of the patient safety culture, have an  
236 important influence on their attitudes toward patient safety and their behaviours  
237 within this domain.<sup>21</sup> Therefore, screening their perceptions of the key areas of patient  
238 safety, as in the present study, offers an opportunity to improve their clinical acumen  
239 and future medical education. It can also be utilized by medical directors and clinical  
240 service supervisors for real-time assessment in promoting a safety culture. We also  
241 conducted the present study to demonstrate how the APSQ-III can be used to identify  
242 differences among school year cohorts across several medical universities in  
243 Northeast China.  
244 The findings of this study highlight that medical students tend to have generally  
245 positive perceptions of the patient safety culture.<sup>22</sup> Interestingly, although none of our  
246 participants had received any formal teaching on the subject, students from all four  
247 universities tended to report that they had been trained in this subject well (84.9%).



1  
2  
3 248 This finding is similar to that of a previous study by Leung et al. in Hong Kong,<sup>14</sup>  
4  
5 249 who proposed that the result could be due to students' misunderstanding or an  
6  
7 250 inability to distinguish teaching from they have learned from public media. We also  
8  
9 251 believe that this is because of a rather common psychological phenomenon among  
10  
11 252 students in China—that is, escaping responsibility. This phenomenon refers to the idea  
12  
13 253 that Chinese students are struggling to cope with and protect themselves in an  
14  
15 254 intensely hierarchical environment, which manifests as a fear of telling the truth  
16  
17 255 because of its potential impact on teachers' evaluations of them. Accordingly, many  
18  
19 256 students do not want to acknowledge errors or defects, and may be unwilling to report  
20  
21 257 problems to avoid poor evaluations or to fit in within their teams.<sup>5</sup> Therefore, more  
22  
23 258 attention should be paid to this reluctance to 'speak up' in Chinese culture, and greater  
24  
25 259 vigilance is required to prevent a fear of exposing deficiencies.

25 260 Leung et al. found the highest positive response rates for 'working hours as an error  
26  
27 261 cause', 'error inevitability', and 'importance of patient safety in the curriculum',  
28  
29 262 whereas 'patient involvement in reducing error' and 'team functioning' had the lowest  
30  
31 263 overall positive response rates.<sup>14</sup> By contrast, in the present study, 'patient  
32  
33 264 involvement in reducing errors' and 'patient safety training received' had the highest  
34  
35 265 positive response rates, while 'professional incompetence as an error cause' and  
36  
37 266 'disclosure responsibility' had the lowest. In contrast with students in Hong Kong,  
38  
39 267 students in mainland China responded positively to items relating to 'patient  
40  
41 268 involvement in reducing errors'. A probable reason for this finding is that patients in  
42  
43 269 Hong Kong must adhere to the illness-specific arrangements made by public medical  
44  
45 270 institutions regarding waiting lists, hospitalisation, and surgery. Additionally, they  
46  
47 271 cannot choose their own doctors (however, they are generally trusting of doctors and  
48  
49 272 hospitals). In mainland China, however, patients' understanding of their diagnosis and  
50  
51 273 treatment has been continuously improving, and the traditional medical model is  
52  
53 274 gradually being replaced with more active patient participation.<sup>23</sup> The doctor and  
54  
55 275 patient undertake the process of medical decision-making together, and the patient has  
56  
57 276 the right to choose their doctor independently. In addition, medical staff in mainland  
58  
59 277 China often encourage patients and their families to participate in diagnosis- and

1  
2  
3 278 treatment-related procedures.<sup>24</sup> This might include encouraging patients or family  
4  
5 279 members to participate in examining the label on an infusion bottle to obtain the name  
6  
7 280 of the drug, reading drug information, and so on. Previous research has shown that  
8  
9 281 patient participation can reduce the occurrence of medical errors.<sup>25</sup> All these points  
10  
11 282 might explain why Chinese medical students show positive attitudes for this domain.  
12  
13 283 We found that responses to the ‘professional incompetence as an error cause’ domain  
14  
15 284 were more negative compared to responses in the other domains, especially for the  
16  
17 285 following items: ‘medical errors are a sign of incompetence’ (32.5%), ‘medical  
18  
19 286 students generally consider errors as inevitable’ (74.9%), and ‘even the most  
20  
21 287 experienced and competent doctors make errors’ (84.3%). These findings suggest that  
22  
23 288 students lack a proper understanding of the causes for certain errors. Our results are  
24  
25 289 similar to those of Moskowitz et al., who found that students in the US were uncertain  
26  
27 290 as to what constituted an error and what caused errors.<sup>18</sup>  
28  
29 291 Medical students generally agreed that medical errors are caused by humans and a  
30  
31 292 sign of incompetence (32.5%), showing that they lacked awareness of systematic  
32  
33 293 errors. Furthermore, a number of students agreed that long working hours and medical  
34  
35 294 staff incompetence were important causes of errors. This finding indicates that the  
36  
37 295 students emphasized human factors in judging the causes of errors, which aligns with  
38  
39 296 findings from a previous study on students from Hong Kong: in that study, most  
40  
41 297 students reported that ‘if they work hard, they can eliminate errors’ was an effective  
42  
43 298 strategy for preventing future errors.<sup>26</sup> These findings suggest a need for emphasizing  
44  
45 299 the potential role of other factors (e.g. systemic errors and procedural complexity)  
46  
47 300 during the occurrence of medical errors.  
48  
49 301 Several students reported positive perceptions of their error reporting confidence, but  
50  
51 302 had less positive perceptions of their responsibility for reporting (i.e. what and how to  
52  
53 303 report a problem with patient care when they witness it). Their highly positive views  
54  
55 304 on reporting medical errors (74.9%) are similar to the results of a Turkish study  
56  
57 305 conducted by Karaoglu et al.,<sup>27 28</sup> who found that 60.7% (n = 147) of students stated  
58  
59 306 that they would report an error to the hospital committee if they had made it  
60  
307 themselves. Furthermore, 68.6% (n = 166) of the students in that study stated that they

1  
2  
3 308 would report a medical error if they witnessed one.  
4  
5 309 In Flin et al.'s study, most students reported that they would speak up about an error.  
6  
7 310 However, this result was somewhat confusing, since students also had high positive  
8  
9 311 response rates for the item, 'it is not necessary to report errors that do not result in  
10  
11 312 adverse outcomes for the patient' (60.8%).<sup>29</sup> More than 50% of the students attending  
12  
13 313 the Medical College at Jiamusi University agreed with this statement. All members of  
14  
15 314 the medical team, including medical students, should be able to recognize unsafe  
16  
17 315 conditions, report errors, and strive to improve error disclosure in settings where it is  
18  
19 316 lacking. This persistent cultural change should contribute to the eradication of errors  
20  
21 317 and reduce patient safety concerns.<sup>30-32</sup>  
22  
23 318 Numerous students agreed with the following statements: 'my training is preparing  
24  
25 319 me to understand the causes of medical errors' (84.8%) and 'I have a good  
26  
27 320 understanding of patient safety issues because of my undergraduate medical training'  
28  
29 321 (85.2%). This finding illustrates that medical students tend to have grand expectations  
30  
31 322 regarding patient safety education, which is in line with the findings of Madigosky et  
32  
33 323 al.<sup>33</sup> This US-based study also revealed that awareness of patient safety and medical  
34  
35 324 errors can be increased and sustained via an experiential curriculum, which students  
36  
37 325 rated as a valuable experience.<sup>13 33</sup>  
38  
39 326 Insights can be gleaned from the differences observed among the four medical schools.  
40  
41 327 The four universities ranked as follows in their positive response rates, in descending  
42  
43 328 order: Mudanjiang Medical University, the Medical College of Jiamusi University,  
44  
45 329 Qiqihar Medical University, and Harbin Medical University. Notably, we found no  
46  
47 330 evidence of different reporting practices between the four medical schools. Possibly,  
48  
49 331 the differences in local patient safety cultures, as well as students' social and cultural  
50  
51 332 backgrounds, are significant contributing factors to these different positive response  
52  
53 333 rates.<sup>30</sup> However, the present study design did not enable an exploration of these  
54  
55 334 factors; we could only determine the focal aspects of future teaching. For example,  
56  
57 335 Mudanjiang Medical University, the Medical College of Jiamusi University, and  
58  
59 336 Qiqihar Medical University might target education toward the classification and  
337 underlying mechanisms of medical errors. In contrast, Harbin Medical University

1  
2  
3 338 might target students' confidence in error reporting as an area for improvement.  
4  
5 339 Our results run counter to those from other countries. For example, Flin et al.'s study  
6  
7 340 in the UK found that most first year students reported 'medium low' or 'average'  
8  
9 341 levels of knowledge regarding errors and patient safety issues.<sup>34-38</sup> Our results  
10  
11 342 revealed that positive perceptions of a patient safety culture tended to decrease as  
12  
13 343 students progressed through medical school. As seen in Table 3, more senior students  
14  
15 344 appeared to have less positive perceptions of 'error reporting confidence' and 'the  
16  
17 345 importance of patient safety in the curriculum'. Possible reasons for these findings  
18  
19 346 include senior students' experience of working in strong clinical hierarchies, which is  
20  
21 347 known to have a negative influence on error reporting and disclosure of medical  
22  
23 348 errors.<sup>39</sup> Furthermore, this decrease in medical error disclosure might emerge as result  
24  
25 349 of the increasing awareness and more realistic self-assessment that students develop  
26  
27 350 during the process of medical education.<sup>40</sup> It could also be the result of inadequate  
28  
29 351 training and preparation of young doctors. More senior students also appeared to have  
30  
31 352 less positive perceptions of 'the importance of patient safety in the curriculum'. A  
32  
33 353 likely reason for this finding is that because students face an increasing number of  
34  
35 354 courses and pressure of examinations as they progress from their first to their fifth  
36  
37 355 year, they do not want to add new courses to their curriculum. Still, the precise reason  
38  
39 356 for this remains to be determined.

40 357 A limitation of this study is the possible non-response bias. Students who agreed to  
41  
42 358 respond to the survey might have been more interested in patient safety than their  
43  
44 359 non-responding peers. This greater level of interest might have led to the inflation of  
45  
46 360 attitude ratings. Another limitation is that we made use of a non-standardised survey  
47  
48 361 instrument. In addition, the APSQ-III is a self-assessment questionnaire that addresses  
49  
50 362 students' own perceptions of a patient safety culture rather than their actual teachings  
51  
52 363 in this area. Therefore, the present results might not be indicative of students' actual  
53  
54 364 skills and knowledge. Moreover, extrapolation of our findings to other medical  
55  
56 365 colleges should be done with caution. Nevertheless, this is the first use of the  
57  
58 366 APSQ-III to compare patient safety cultures across different schools and school year  
59  
60 367 cohorts within mainland China. While the present sample was taken from only one

1  
2  
3 368 region in China, we covered almost all the medical colleges within this rather large  
4  
5 369 province. Furthermore, we recruited a cohort of medical students across all five years  
6  
7 370 of their programs; therefore, this study represents an important advancement in  
8  
9 371 research on patient safety education in China. We believe that our findings can help  
10  
11 372 educators develop suitable curricula for a patient safety education.

12 373 In conclusion, our study explored perceptions of the patient safety culture among  
13  
14 374 medical students in China. These findings suggest that medical students' perceptions  
15  
16 375 of the patient safety culture can provide a tool for guiding medical education.  
17  
18 376 Institutions should focus more on issues related to the causes of medical errors and  
19  
20 377 error reporting. Shifts in patient safety culture should also be based on situations  
21  
22 378 affecting different schools and cohorts, especially among third year medical students.  
23  
24 379 Longitudinal studies using a validated instrument should also be conducted to better  
25  
26 380 evaluate patient safety education programs and their relative impact on local  
27  
28 381 healthcare development. Further studies should also explore the culture of reporting  
29  
30 382 errors and how students in nursing and healthcare education programs address these  
31  
32 383 errors.

33 384

### 34 385 **References**

- 36 386 1. Kohn LT, Corrigan JM, Donaldson MS. Institute of Medicine. To err is human:  
37  
38 387 building a safer health system. *Annales Francaises D Anesthesie Et De*  
39  
40 388 *Reanimation* 2000;7(12):245-46.
- 41 389 2. De VEN, Ramrattan MA, Smorenburg SM, et al. The incidence and nature of  
42  
43 390 in-hospital adverse events: a systematic review. *Quality & Safety in Health Care*  
44  
45 391 2008;17(3):216.
- 46 392 3. Huang DT, Clermont G, Kong L, et al. Intensive care unit safety culture and  
47  
48 393 outcomes: a US multicenter study. *International Journal for Quality in Health*  
49  
50 394 *Care Journal of the International Society for Quality in Health Care*  
51  
52 395 2010;22(3):151-61.
- 53 396 4. Willeumier D. Advocate Health Care: A Systemwide Approach to Quality and  
54  
55 397 Safety. *Joint Commission Journal on Quality & Safety* 2004;30(10):559-66.

- 1  
2  
3 398 5. Liao JM, Etchegaray JM, Williams ST, et al. Assessing medical students'  
4  
5 399 perceptions of patient safety: the medical student safety attitudes and  
6  
7 400 professionalism survey. *Academic Medicine Journal of the Association of*  
8  
9 401 *American Medical Colleges* 2013;89(2):343.
- 10  
11 402 6. Kirch DG, Boysen PG. Changing the culture in medical education to teach patient  
12  
13 403 safety. *Health Aff* 2010;29(9):1600-04.
- 14  
15 404 7. Hilfiker D. Facing our mistakes. *New England Journal of Medicine*  
16  
17 405 1984;310(2):118.
- 18  
19 406 8. Pilpel D, Schor R, Benbassat J. Barriers to acceptance of medical error: the case  
20  
21 407 for a teaching program (695). *Medical Education* 1998;32(1):3.
- 22  
23 408 9. Leape LL, Berwick DM. Five years after *To Err Is Human*: what have we learned?  
24  
25 409 *Jama* 2005;293(19):2384-90.
- 26  
27 410 10. Walton MM, Shaw T, Barnet S, et al. Developing a national patient safety  
28  
29 411 education framework for Australia. *Quality & Safety in Health Care*  
30  
31 412 2006;15(6):437-42.
- 32  
33 413 11. WHO Patient Safety Curriculum Guide for Medical Schools. 2009,  
34  
35 414 <http://www.who.int/patient/education/curriculum/download/en/index.html>.
- 36  
37 415 12. Carruthers S, Lawton R, Sandars J, et al. Attitudes to patient safety amongst  
38  
39 416 medical students and tutors: Developing a reliable and valid measure. *Medical*  
40  
41 417 *Teacher* 2009;31(8):370-6.
- 42  
43 418 13. Bowman C, Neeman N, Sehgal NL. Enculturation of unsafe attitudes and  
44  
45 419 behaviors: student perceptions of safety culture. *Academic Medicine Journal of*  
46  
47 420 *the Association of American Medical Colleges* 2013;88(6):802-10.
- 48  
49 421 14. Leung GK, Ang SB, Lau TC, et al. Patient safety culture among medical students  
50  
51 422 in Singapore and Hong Kong. *Singapore Med J* 2013;54(9):501-05.
- 52  
53 423 15. Mingming Zhang, Yurong Duan, Jing Li, et al. Patient Safety Education: One of  
54  
55 424 the Important Topics for 21st Medical Education. *Chinese Journal of*  
56  
57 425 *Evidence-Based Medicine* 2010;10(6):637-39.
- 58  
59 426 16. Walton MM, Barraclough BH, Van Staalduinen SA, et al. An educational  
60  
427 approach to improving healthcare safety and quality. *Chinese Journal of*

- 1  
2  
3 428 Evidence-Based Medicine 2009;2(3):136-42.  
4  
5 429 17. China Statistical Yearbook of health and family planning.National Health and  
6  
7 430 Family Planning Commission of the People's Republic of China.China Union  
8  
9 431 Medical University Press.2014.  
10  
11 432 18. Sexton JB, Helmreich RL, Neilands TB, et al. The Safety Attitudes Questionnaire:  
12  
13 433 psychometric properties, benchmarking data, and emerging research. BMC Health  
14  
15 434 Services Research 2006;6(1):44.  
16  
17 435 19. Wiggleton C, Petrusa E, Loomis K, et al. Medical students' experiences of moral  
18  
19 436 distress: development of a web-based survey. Academic Medicine Journal of the  
20  
21 437 Association of American Medical Colleges 2010;85(1):111-17.  
22  
23 438 20. Etchegaray JM, Gallagher TH, Bell SK, et al. Error disclosure: a new domain for  
24  
25 439 safety culture assessment. BMJ Quality & Safety 2012;21(7):594.  
26  
27 440 21. Agency for Healthcare Research and Quality. Hospital Survey on Patient Safety  
28  
29 441 Culture. [http://www.ahrq.gov/qual/](http://www.ahrq.gov/qual/patientsafetyculture/hospindex.htm) patientsafetyculture/hospindex.htm.  
30  
31 442 Accessed October 17, 2013.  
32  
33 443 22. Edition T. Principles and Practice of Structural Equation Modeling. Guilford  
34  
35 444 Press 2015.  
36  
37 445 23. Na Yuan, Chune Liu, Lei Yu, et al. Study Process of Patients Involved in  
38  
39 446 Treatment Decision—Making State Quo and Influencing Factors. Medicine and  
40  
41 447 Society, 2017, 30(3):58-61.  
42  
43 448 24. Fan X, Liu Z, Sun R, et al. Discussion on the influence of patient safety culture to  
44  
45 449 hospital safety management in China. Chinese Hospitals 2017.  
46  
47 450 25. Gongchun Lan, Wenguo Ying, Xiexin Qian, et al. Effective observation on  
48  
49 451 prevention for mismatched intravenous infusion by patients' participation in  
50  
51 452 double-identity confirmation. Chinese Journal of Modern Nursing, 2012,  
52  
53 453 18(14):1657-1659.  
54  
55 454 26. Leung GK, Patil NG. Patient safety in the undergraduate curriculum: medical  
56  
57 455 students' perception. Hong Kong medical journal = Xianggang yi xue za zhi /  
58  
59 456 Hong Kong Academy of Medicine 2010;16(2):101-5.  
60  
457 27. Singer SJ, Gaba DM, Falwell A, et al. Patient Safety Climate in 92 US Hospitals:

- 1  
2  
3 458 Differences by Work Area and Discipline. *Medical Care* 2009;47(1):23-31.  
4  
5 459 28. Seker M. Knowledge of new entrant medical students about medical errors in  
6  
7 460 Selcuk University: an educational perspective. *Turkiye Klinikleri J Med Sci* 2008;  
8  
9 461 28:217-22.  
10  
11 462 29. Flin R, Rjackson P. Year 1 medical undergraduates' knowledge of and attitudes to  
12  
13 463 medical error. *Medical Education* 2009;43(12):1147-55.  
14  
15 464 30. Wetzel AP, Dow AW, Mazmanian PE. Patient safety attitudes and behaviors of  
16  
17 465 graduating medical students. *Evaluation & the Health Professions*  
18  
19 466 2012;35(2):221-38.  
20  
21 467 31. Caldicott CV, Faber-Langendoen K. Deception, discrimination, and fear of  
22  
23 468 reprisal: lessons in ethics from third-year medical students. *Academic Medicine*  
24  
25 469 *Journal of the Association of American Medical Colleges* 2005;80(9):866-73.  
26  
27 470 32. Vohra PD, Johnson JK, Daugherty CK, et al. Housestaff and medical student  
28  
29 471 attitudes toward medical errors and adverse events. *Jt Comm J Qual Patient Saf*  
30  
31 472 2007;33(8):493-501.  
32  
33 473 33. Madigosky WS, Headrick LA, Nelson K, et al. Changing and sustaining medical  
34  
35 474 students' knowledge, skills, and attitudes about patient safety and medical  
36  
37 475 fallibility. *Academic Medicine* 2006;81(1):94-101.  
38  
39 476 34. Patey R, Flin R, Cuthbertson BH, et al. Patient safety: helping medical students  
40  
41 477 understand error in healthcare. *Quality & Safety in Health Care*  
42  
43 478 2007;16(4):256-59.  
44  
45 479 35. Pearson P, Steven A, Howe A, et al. Learning about patient safety: organizational  
46  
47 480 context and culture in the education of health care professionals. *J Health Serv*  
48  
49 481 *Res Policy* 2010;15 Suppl 1(15 Suppl 1):4-10.  
50  
51 482 36. Walton MM. Hierarchies: the Berlin Wall of patient safety. *Quality & Safety in*  
52  
53 483 *Health Care* 2006;15(4):229-30.  
54  
55 484 37. Brainard AH, Brislen HC. Viewpoint: learning professionalism: a view from the  
56  
57 485 trenches. *Academic Medicine* 2007;82(11):1010-14.  
58  
59 486 38. Lucey C, Souba W. Perspective: the problem with the problem of professionalism.  
56  
57 487 *Academic Medicine Journal of the Association of American Medical Colleges*



1  
2  
3 488 2010;85(6):1018-24.  
4

5 489 39. Tallentire VR, Smith SE, Skinner J, et al. Understanding the behaviour of newly  
6  
7 490 qualified doctors in acute care contexts. *Medical Education* 2011;45(10):995.

8  
9 491 40. Kiesewetter J, Kager M, Lux R, et al. German undergraduate medical students'  
10  
11 492 attitudes and needs regarding medical errors and patient safety – A national  
12  
13 493 survey in Germany. *Medical Teacher* 2014;36(6):505-10.

14 494 **Acknowledgements:**

15  
16 495 This study was funded by the Natural Science Foundation of China (71273002,  
17  
18 496 71473064); the New Century Excellent Talents of University at the Ministry of  
19  
20 497 Education, China (1252-NCET02); the China Postdoctoral Science Foundation  
21  
22 498 (2015M570211, 2016T90181); and Collaborative Innovation Centre of Social Risks  
23  
24 499 Governance in Health;Project of Education Department of Heilongjiang  
25  
26 500 Province(Education Reform Project, JGXM\_HLJ\_2014087);Social science  
27  
28 501 association of Heilongjiang Province(15058).

29 502

30 503 **Author contributions statement:**

31 504 Mingli Jiao, Qunhong Wu, Ying Li and He Liu. designed the study; Jinghua Liu, Limin  
32  
33 505 Liu, Yanming Zhao, Kexin Jiang, Huiying Fang, Peihang Sun, Peng Li, Yameng Wang,  
34  
35 506 Haonan Jia and Yan Lu collected the data; He Liu, Ying Li, and Yuming Wu analysed  
36  
37 507 the data; He Liu, Ying Li, Mingli Jiao, Siqi Zhao drafted the manuscript; and Mingli  
38  
39 508 Jiao contributed to the manuscript's revision. All authors approved the final  
40  
41 509 manuscript for publication.

42 510 **Conflict of interest declaration:** The authors declare no conflict of interest

43 511 **Data sharing statement:** Data are available from the corresponding author upon  
44  
45 512 request.

46 513

47 514

48 515

49 516

50 517

51 518

1  
2  
3  
4  
5  
6  
7  
8  
9  
10  
11  
12  
13  
14  
15  
16  
17  
18  
19  
20  
21  
22  
23  
24  
25  
26  
27  
28  
29  
30  
31  
32  
33  
34  
35  
36  
37  
38  
39  
40  
41  
42  
43  
44  
45  
46  
47  
48  
49  
50  
51  
52  
53  
54  
55  
56  
57  
58  
59  
60

519

For peer review only

520 Table 1 Respondents' demographic characteristics

| Characteristic         | n (%)      |            |            |            |
|------------------------|------------|------------|------------|------------|
|                        | A          | B          | C          | D          |
| Gender                 |            |            |            |            |
| Male                   | 322 (44.4) | 261 (41.7) | 167 (36.4) | 305 (45)   |
| Female                 | 404 (55.6) | 366 (58.3) | 292 (63.6) | 377 (55)   |
| Year in medical school |            |            |            |            |
| First                  | 111 (15.3) | 186 (29.5) | 36 (7.8)   | 66 (9.7)   |
| Second                 | 132 (18.2) | 146 (23.1) | 115 (25.1) | 90 (13.2)  |
| Third                  | 154 (21.2) | 117 (18.5) | 110 (24)   | 206 (30.2) |
| Fourth                 | 245 (33.7) | 100 (15.9) | 131 (28.5) | 270 (39.6) |
| Fifth                  | 84 (11.6)  | 82 (13)    | 67 (14.6)  | 50 (7.3)   |
| Overall                | 726 (29.1) | 631 (25.3) | 459 (18.4) | 682 (27.3) |

521 A = Harbin Medical University; B = Qiqihar Medical University; C = Mudanjiang

522 Medical University; D = Medical College of Jiamusi University

523 Table 2 Responses to APSQ-III items

| Domain                                                                                                                                         | Positive responses (%) <sup>†</sup> |                 |      |      |      |
|------------------------------------------------------------------------------------------------------------------------------------------------|-------------------------------------|-----------------|------|------|------|
|                                                                                                                                                | Overall                             | Between schools |      |      |      |
|                                                                                                                                                |                                     | A               | B    | C    | D    |
| <b>Patient safety training received</b>                                                                                                        | 84.9                                | 57.3            | 90   | 99.4 | 98.5 |
| 1. My training is preparing me to understand the causes of medical errors.                                                                     | 84.8                                | 56.6            | 89.7 | 99   | 99   |
| 2. I have a good understanding of patient safety issues as a result of my undergraduate medical training.                                      | 85.2                                | 58.4            | 90.2 | 99.8 | 97   |
| 3. My training is preparing me to prevent medical errors.                                                                                      | 84.7                                | 56.8            | 90.1 | 99.3 | 99.4 |
| <b>Error reporting confidence</b>                                                                                                              | 74.9                                | 53.1            | 75.8 | 85.6 | 88.1 |
| 4. I would feel comfortable reporting any errors I had made, no matter how serious the outcome had been for the patient.                       | 71.6                                | 52.9            | 68.5 | 80.5 | 85.7 |
| 5. I would feel comfortable reporting any errors other people had made, no matter how serious the outcome had been for the patient.            | 76.7                                | 53.4            | 79.8 | 88.1 | 89.5 |
| 6. I am confident I can talk openly to my supervisor about an error I had made, even if it resulted in potential or actual harm to my patient. | 76.5                                | 53.1            | 79   | 88.1 | 89.2 |
| <b>Working hours as an error cause</b>                                                                                                         | 83.4                                | 56.2            | 88.2 | 98   | 98.7 |

|                                                                                                               |      |       |      |      |      |
|---------------------------------------------------------------------------------------------------------------|------|-------|------|------|------|
| 7. Shorter shifts for doctors will reduce medical errors.                                                     | 81.7 | 53.9  | 85.9 | 97.1 | 97.3 |
| 8. By not taking regular breaks during shifts, doctors are at an increased risk of making errors.             | 84.7 | 57.8  | 89.8 | 98.9 | 99.5 |
| 9. The number of hours doctors work increases the likelihood of making medical errors.                        | 83.8 | 56.8  | 89   | 97.9 | 99.4 |
| <b>Error inevitability</b>                                                                                    | 74.9 | 55.2  | 80.9 | 87.1 | 82.2 |
| 10. Even the most experienced and competent doctors make errors.                                              | 84.3 | 56.7  | 89.4 | 99.8 | 98.7 |
| 11. A true professional does not make mistakes or errors. <sup>†</sup>                                        | 68.9 | 53    | 79.3 | 86.1 | 64.8 |
| 12. Human error is inevitable.                                                                                | 71.6 | 56    | 73.9 | 75.4 | 83.2 |
| <b>Professional incompetence as an error cause</b>                                                            | 58.4 | 53.25 | 59.6 | 61   | 60   |
| 13. Most medical errors result from careless nurses                                                           | 68.1 | 56.8  | 79   | 79.3 | 62.1 |
| 14. If people paid more attention at work, medical errors would be avoided <sup>†</sup>                       | 67.2 | 53.2  | 62.5 | 72.8 | 80.1 |
| 15. Most medical errors result from careless doctors <sup>†</sup>                                             | 65.8 | 55.1  | 74.2 | 77.1 | 61.4 |
| 16. Medical errors are a sign of incompetence <sup>†</sup>                                                    | 32.5 | 47.9  | 22.7 | 14.7 | 36.5 |
| <b>Disclosure responsibility</b>                                                                              | 69.4 | 55.1  | 72.6 | 78.4 | 74.8 |
| 17. It is not necessary to report errors which do not result in adverse outcomes for the patient <sup>†</sup> | 60.8 | 57.6  | 70.7 | 69.8 | 48.8 |
| 18. Doctors have a responsibility to disclose errors to patients only if the errors result in patient harm.   | 80.8 | 55    | 85.2 | 93.8 | 94.5 |
| 19. All medical errors should be reported.                                                                    | 66.7 | 52.6  | 61.9 | 71.6 | 81   |

1  
2  
3  
4  
5  
6  
7  
8  
9  
10  
11  
12  
13  
14  
15  
16  
17  
18  
19  
20  
21  
22  
23  
24  
25  
26  
27  
28  
29  
30  
31  
32  
33  
34  
35  
36  
37  
38  
39  
40  
41  
42  
43  
44  
45  
46  
47

|                                                                                                                                            |      |      |      |      |      |
|--------------------------------------------------------------------------------------------------------------------------------------------|------|------|------|------|------|
| <b>Team functioning</b>                                                                                                                    | 76.9 | 55.7 | 77.5 | 87.6 | 91.8 |
| 20. Better multidisciplinary teamwork will reduce medical errors.                                                                          | 69.2 | 54.9 | 64.5 | 75.4 | 84.5 |
| 21. Teaching students teamwork skills will reduce medical errors.                                                                          | 84.7 | 56.6 | 90.5 | 99.8 | 99.1 |
| <b>Patient involvement in reducing errors</b>                                                                                              | 84.7 | 56.7 | 90.2 | 99.4 | 98.7 |
| 22. Patients have an important role in preventing medical errors.                                                                          | 85.1 | 56.1 | 90.5 | 99.5 | 98.6 |
| 23. Encouraging patients to be more involved in their care can help to reduce the risk of medical errors occurring.                        | 84.5 | 57.3 | 90   | 99.3 | 98.8 |
| <b>Importance of patient safety in the curriculum</b>                                                                                      | 71.6 | 56.4 | 78.5 | 82.4 | 74.4 |
| 24. Teaching students about patient safety should be an important priority in medical students' training.                                  | 84.1 | 55.9 | 89.5 | 99.1 | 98.6 |
| 25. Patient safety issues cannot be taught; they can only be learned through clinical experience, which is gained when one is qualified. † | 46.6 | 55.8 | 55.4 | 50   | 25.3 |
| 26. Learning about patient safety issues before I qualify will enable me to become a more effective doctor.                                | 85   | 57.5 | 90.7 | 99.3 | 99.4 |

524 A = Harbin Medical University; B = Qiqihar Medical University; C = Mudanjiang Medical University; D = Medical College of Jiamusi  
525 University; †Positive responses include responses of 'agree' or 'strongly agree'. The denominator for each question might vary because some  
526 students did not respond to every question in the survey; † Negatively worded item, where the positive response rate is based on responses of

527 'strongly disagree' or 'disagree'.

528

529 Table 3 Responses to the nine domains of the APSQ-III

|         |                        | Positive responses (%) <sup>‡</sup> |                            |                                 |                     |                                             |                           |                  |                                        |                                                |
|---------|------------------------|-------------------------------------|----------------------------|---------------------------------|---------------------|---------------------------------------------|---------------------------|------------------|----------------------------------------|------------------------------------------------|
| Schools | Year in medical school | Patient safety training received    | Error reporting confidence | Working hours as an error cause | Error inevitability | Professional incompetence as an error cause | Disclosure responsibility | Team functioning | Patient involvement in reducing errors | Importance of patient safety in the curriculum |
| A       | First                  | 78.6                                | 73.4                       | 79.7                            | 71.9                | 56.6                                        | 66.4                      | 73.9             | 80.8                                   | 50.7                                           |
|         | Second                 | 74.3                                | 62.9                       | 74.4                            | 71.4                | 56                                          | 66.6                      | 64               | 71.9                                   | 49.8                                           |
|         | Third                  | 57.1                                | 52.9                       | 56.2                            | 52.8                | 51.9                                        | 51.4                      | 57.5             | 55.1                                   | 41.5                                           |
|         | Fourth                 | 43.1                                | 40                         | 40.5                            | 45.4                | 51.1                                        | 48.7                      | 42.7             | 42.8                                   | 37.6                                           |
|         | Fifth                  | 45.2                                | 46.4                       | 42.6                            | 41.1                | 51.8                                        | 46.6                      | 51.2             | 42.7                                   | 33.7                                           |
| B       | First                  | 99.4                                | 84.7                       | 95.8                            | 86                  | 61.5                                        | 78.2                      | 84.1             | 98.9                                   | 62.6                                           |
|         | Second                 | 97.2                                | 86.8                       | 95                              | 91.1                | 66.3                                        | 78.5                      | 87               | 99.1                                   | 59.8                                           |
|         | Third                  | 98                                  | 72.7                       | 95.9                            | 83.8                | 59.2                                        | 63.3                      | 81.3             | 100                                    | 63.5                                           |
|         | Fourth                 | 98.9                                | 86.5                       | 97.3                            | 84.4                | 60.9                                        | 77.5                      | 78.8             | 97.3                                   | 63.5                                           |

1  
2  
3  
4  
5  
6  
7  
8  
9  
10  
11  
12  
13  
14  
15  
16  
17  
18  
19  
20  
21  
22  
23  
24  
25  
26  
27  
28  
29  
30  
31  
32  
33  
34  
35  
36  
37  
38  
39  
40  
41  
42  
43  
44  
45  
46  
47

|   |        |      |      |      |      |      |      |      |      |      |
|---|--------|------|------|------|------|------|------|------|------|------|
|   | Fifth  | 61.4 | 51.9 | 61.2 | 61.6 | 51.5 | 57.4 | 56.1 | 58.7 | 47.2 |
| C | First  | 99.1 | 90.3 | 96.1 | 91.9 | 62   | 84.1 | 86.4 | 98.2 | 63.5 |
|   | Second | 99.6 | 90.3 | 98.3 | 84.2 | 63.6 | 81.2 | 81.1 | 99.5 | 63.2 |
|   | Third  | 100  | 83.4 | 97.9 | 87.1 | 60.7 | 78.2 | 91   | 100  | 59.3 |
|   | Fourth | 97   | 77.9 | 96.9 | 86.9 | 60   | 75.2 | 87.2 | 95.7 | 66.5 |
|   | Fifth  | 99.7 | 79.9 | 99.4 | 85.2 | 58.5 | 70.9 | 92.6 | 100  | 58.2 |
| D | First  | 99.1 | 87.1 | 99.2 | 86   | 63.3 | 72.7 | 90.2 | 97.1 | 56.7 |
|   | Second | 98.5 | 88.7 | 99.2 | 83.2 | 61.3 | 77.5 | 91   | 98.2 | 54.6 |
|   | Third  | 97.1 | 87.2 | 97.2 | 82.9 | 59.9 | 74.8 | 89.3 | 99.2 | 57.8 |
|   | Fourth | 100  | 96.1 | 100  | 74.2 | 52.3 | 67   | 97.7 | 100  | 52.4 |
|   | Fifth  | 100  | 78   | 100  | 79.3 | 41   | 74.9 | 100  | 100  | 65.1 |

530 A = Harbin Medical University; B = Qiqihar Medical University; C = Mudanjiang Medical University; D = Medical College of Jiamusi  
 531 University; †Positive responses include responses of ‘agree’ or ‘strongly agree’. The denominator for each question might vary because some  
 532 students did not respond to every question in the survey.

533  
534  
535  
536



537 Table 4 APSQ-III domains that demonstrated significant differences between the five cohorts across all four schools

| Year in<br>medical<br>school | Positive responses (%) <sup>†</sup>        |                                   |                                           |                         |                                                      |                              |                      |                                                  |                                                          |
|------------------------------|--------------------------------------------|-----------------------------------|-------------------------------------------|-------------------------|------------------------------------------------------|------------------------------|----------------------|--------------------------------------------------|----------------------------------------------------------|
|                              | Patient<br>safety<br>training<br>received* | Error<br>reporting<br>confidence* | Working<br>hours as<br>an error<br>cause* | Error<br>inevitability* | Professional<br>incompetence<br>as an error<br>cause | Disclosure<br>responsibility | Team<br>functioning* | Patient<br>involvement<br>in reducing<br>errors* | Importance<br>of patient<br>safety in the<br>curriculum* |
| First                        | 93.5                                       | 82.5                              | 91.7                                      | 82.7                    | 60.4                                                 | 74.4                         | 82.5                 | 93.5                                             | 58.1                                                     |
| Second                       | 91.9                                       | 81.6                              | 90.9                                      | 82.6                    | 61.9                                                 | 75.8                         | 79.9                 | 91.5                                             | 56.9                                                     |
| Third                        | 87.4                                       | 74.6                              | 86.4                                      | 76                      | 57.8                                                 | 67                           | 79.7                 | 87.9                                             | 54.9                                                     |
| Fourth                       | 80.7                                       | 73.2                              | 79.5                                      | 68.2                    | 54.4                                                 | 63.9                         | 75.3                 | 80                                               | 51.5                                                     |
| Fifth                        | 72.4                                       | 61.8                              | 71.7                                      | 64.7                    | 51.6                                                 | 60.4                         | 71                   | 71                                               | 49.1                                                     |

538 \*P < 0.05; <sup>†</sup>Positive responses include responses of 'agree' or 'strongly agree'. The denominator for each question might vary because some  
539 students did not respond to every question in the survey.

540

STROBE Statement—Checklist of items that should be included in reports of *cross-sectional studies*

|                              | Item No | Recommendation                                                                                                                                                                                    | Reported on page # |
|------------------------------|---------|---------------------------------------------------------------------------------------------------------------------------------------------------------------------------------------------------|--------------------|
| <b>Title and abstract</b>    | 1       | (a) Indicate the study's design with a commonly used term in the title or the abstract                                                                                                            | 1                  |
|                              |         | (b) Provide in the abstract an informative and balanced summary of what was done and what was found                                                                                               | 2                  |
| <b>Introduction</b>          |         |                                                                                                                                                                                                   |                    |
| Background/rationale         | 2       | Explain the scientific background and rationale for the investigation being reported                                                                                                              | 3-5                |
| Objectives                   | 3       | State specific objectives, including any prespecified hypotheses                                                                                                                                  | 5                  |
| <b>Methods</b>               |         |                                                                                                                                                                                                   |                    |
| Study design                 | 4       | Present key elements of study design early in the paper                                                                                                                                           | 5                  |
| Setting                      | 5       | Describe the setting, locations, and relevant dates, including periods of recruitment, exposure, follow-up, and data collection                                                                   | 5                  |
| Participants                 | 6       | (a) Give the eligibility criteria, and the sources and methods of selection of participants                                                                                                       | 5                  |
| Variables                    | 7       | Clearly define all outcomes, exposures, predictors, potential confounders, and effect modifiers. Give diagnostic criteria, if applicable                                                          | 5                  |
| Data sources/<br>measurement | 8*      | For each variable of interest, give sources of data and details of methods of assessment (measurement). Describe comparability of assessment methods if there is more than one group              | 5-6                |
| Bias                         | 9       | Describe any efforts to address potential sources of bias                                                                                                                                         | 5                  |
| Study size                   | 10      | Explain how the study size was arrived at                                                                                                                                                         | 5                  |
| Quantitative variables       | 11      | Explain how quantitative variables were handled in the analyses. If applicable, describe which groupings were chosen and why                                                                      | 5-6                |
| Statistical methods          | 12      | (a) Describe all statistical methods, including those used to control for confounding                                                                                                             | 6                  |
|                              |         | (b) Describe any methods used to examine subgroups and interactions                                                                                                                               | 5                  |
|                              |         | (c) Explain how missing data were addressed                                                                                                                                                       | 5                  |
|                              |         | (d) If applicable, describe analytical methods taking account of sampling strategy                                                                                                                | 5                  |
|                              |         | (e) Describe any sensitivity analyses                                                                                                                                                             |                    |
| <b>Results</b>               |         |                                                                                                                                                                                                   |                    |
| Participants                 | 13*     | (a) Report numbers of individuals at each stage of study—eg numbers potentially eligible, examined for eligibility, confirmed eligible, included in the study, completing follow-up, and analysed | 6-7, 18            |
|                              |         | (b) Give reasons for non-participation at each stage                                                                                                                                              |                    |
|                              |         | (c) Consider use of a flow diagram                                                                                                                                                                |                    |
| Descriptive data             | 14*     | (a) Give characteristics of study participants (eg demographic, clinical, social) and information on exposures and potential confounders                                                          | 6                  |
|                              |         | (b) Indicate number of participants with missing data for each variable of interest                                                                                                               | 5, 18              |
| Outcome data                 | 15*     | Report numbers of outcome events or summary measures                                                                                                                                              | 5-8                |
| Main results                 | 16      | (a) Give unadjusted estimates and, if applicable, confounder-adjusted                                                                                                                             |                    |

|                          |    |                                                                                                                                                                            |             |
|--------------------------|----|----------------------------------------------------------------------------------------------------------------------------------------------------------------------------|-------------|
|                          |    | estimates and their precision (eg, 95% confidence interval). Make clear which confounders were adjusted for and why they were included                                     |             |
|                          |    | (b) Report category boundaries when continuous variables were categorized                                                                                                  |             |
|                          |    | (c) If relevant, consider translating estimates of relative risk into absolute risk for a meaningful time period                                                           |             |
| Other analyses           | 17 | Report other analyses done—eg analyses of subgroups and interactions, and sensitivity analyses                                                                             |             |
| <b>Discussion</b>        |    |                                                                                                                                                                            |             |
| Key results              | 18 | Summarise key results with reference to study objectives                                                                                                                   | 8-11, 18-24 |
| Limitations              | 19 | Discuss limitations of the study, taking into account sources of potential bias or imprecision. Discuss both direction and magnitude of any potential bias                 | 12          |
| Interpretation           | 20 | Give a cautious overall interpretation of results considering objectives, limitations, multiplicity of analyses, results from similar studies, and other relevant evidence | 12          |
| Generalisability         | 21 | Discuss the generalisability (external validity) of the study results                                                                                                      | 12          |
| <b>Other information</b> |    |                                                                                                                                                                            |             |
| Funding                  | 22 | Give the source of funding and the role of the funders for the present study and, if applicable, for the original study on which the present article is based              | 17          |

\*Give information separately for exposed and unexposed groups.

**Note:** An Explanation and Elaboration article discusses each checklist item and gives methodological background and published examples of transparent reporting. The STROBE checklist is best used in conjunction with this article (freely available on the Web sites of PLoS Medicine at <http://www.plosmedicine.org/>, Annals of Internal Medicine at <http://www.annals.org/>, and Epidemiology at <http://www.epidem.com/>). Information on the STROBE Initiative is available at [www.strobe-statement.org](http://www.strobe-statement.org).
